# Supplementary material for: dTAF10- and dTAF10b-Containing Complexes Are Required for Ecdysone-Driven Larval-Pupal Morphogenesis in Drosophila melanogaster
Source: PubMed Central journal article supplement (PMC4640578; doi:10.1371/journal.pone.0142226), 2015-11-10
Supplement: pone.0142226.s007.pdf [file pone.0142226.s007.pdf]

Supplementary table 1: Gene Ontology categories of genes affected by Taf10 and dAda2a mutation with altered expression patterns compared to control.

| Taf10 - Repression |                                                                                 |                          |            |          |            |           |
|--------------------|---------------------------------------------------------------------------------|--------------------------|------------|----------|------------|-----------|
| Category           | Term                                                                            | Number of affected genes | percentage | PValue   | Bonferroni | Benjamini |
| GOTERM_BP_FAT      | GO:0006928~cell motion                                                          | 114                      | 4,2        | 6,19E-19 | 1,58E-15   | 1,58E-15  |
| GOTERM_BP_FAT      | GO:0045165~cell fate commitment                                                 | 93                       | 3,4        | 8,13E-18 | 2,07E-14   | 1,04E-14  |
| GOTERM_BP_FAT      | GO:0009092~cell morphogenesis                                                   | 144                      | 5,3        | 1,50E-17 | 3,83E-14   | 1,28E-14  |
| GOTERM_BP_FAT      | GO:0048732~gland development                                                    | 72                       | 2,7        | 1,48E-16 | 2,83E-13   | 7,07E-14  |
| GOTERM_BP_FAT      | GO:0002165~instar larval or pupal development                                   | 136                      | 5,0        | 2,63E-16 | 5,66E-13   | 1,13E-13  |
| GOTERM_BP_FAT      | GO:0009791~post-embryonic development                                           | 139                      | 5,2        | 5,11E-16 | 1,41E-12   | 2,36E-13  |
| GOTERM_BP_FAT      | GO:0009886~post-embryonic morphogenesis                                         | 120                      | 4,4        | 5,30E-16 | 1,41E-12   | 2,02E-13  |
| GOTERM_BP_FAT      | GO:0030182~neuron differentiation                                               | 133                      | 4,9        | 5,81E-16 | 1,41E-12   | 1,77E-13  |
| GOTERM_BP_FAT      | GO:0048707~instar larval or pupal morphogenesis                                 | 118                      | 4,4        | 8,78E-16 | 2,26E-12   | 2,52E-13  |
| GOTERM_BP_FAT      | GO:0007552~metamorphosis                                                        | 121                      | 4,5        | 1,50E-15 | 3,96E-12   | 3,96E-13  |
| GOTERM_BP_FAT      | GO:0030030~cell projection organization                                         | 121                      | 4,5        | 2,99E-15 | 7,64E-12   | 6,95E-13  |
| GOTERM_BP_FAT      | GO:0032989~cellular component morphogenesis                                     | 155                      | 5,7        | 6,27E-15 | 1,58E-11   | 1,32E-12  |
| GOTERM_BP_FAT      | GO:0048666~neuron development                                                   | 114                      | 4,2        | 4,36E-14 | 1,11E-10   | 8,56E-12  |
| GOTERM_BP_FAT      | GO:0007444~imaginal disc development                                            | 129                      | 4,8        | 4,37E-14 | 1,12E-10   | 7,96E-12  |
| GOTERM_BP_FAT      | GO:0000904~cell morphogenesis involved in differentiation                       | 103                      | 3,8        | 7,68E-14 | 1,96E-10   | 1,31E-11  |
| GOTERM_BP_FAT      | GO:0035272~exocrine system development                                          | 60                       | 2,2        | 2,87E-13 | 7,32E-10   | 4,58E-11  |
| GOTERM_BP_FAT      | GO:0007431~salivary gland development                                           | 60                       | 2,2        | 2,87E-13 | 7,32E-10   | 4,58E-11  |
| GOTERM_BP_FAT      | GO:0007409~axonogenesis                                                         | 75                       | 2,8        | 7,01E-13 | 1,79E-09   | 1,05E-10  |
| GOTERM_BP_FAT      | GO:0035218~leg disc development                                                 | 32                       | 1,2        | 1,11E-12 | 2,82E-09   | 1,57E-10  |
| GOTERM_BP_FAT      | GO:0048667~cell morphogenesis involved in neuron differentiation                | 96                       | 3,6        | 2,25E-12 | 5,73E-09   | 3,02E-10  |
| GOTERM_BP_FAT      | GO:0007560~imaginal disc morphogenesis                                          | 95                       | 3,5        | 2,36E-12 | 6,03E-09   | 3,01E-10  |
| GOTERM_BP_FAT      | GO:0048563~post-embryonic organ morphogenesis                                   | 95                       | 3,5        | 2,36E-12 | 6,03E-09   | 3,01E-10  |
| GOTERM_BP_FAT      | GO:0048569~post-embryonic organ development                                     | 98                       | 3,6        | 2,54E-12 | 6,46E-09   | 3,08E-10  |
| GOTERM_BP_FAT      | GO:0048858~cell projection morphogenesis                                        | 103                      | 3,8        | 3,60E-12 | 9,17E-09   | 4,17E-10  |
| GOTERM_BP_FAT      | GO:0048812~neuron projection morphogenesis                                      | 95                       | 3,5        | 3,74E-12 | 9,53E-09   | 4,14E-10  |
| GOTERM_BP_FAT      | GO:0031175~neuron projection development                                        | 95                       | 3,5        | 4,69E-12 | 1,20E-08   | 4,98E-10  |
| GOTERM_BP_FAT      | GO:0007411~axon guidance                                                        | 57                       | 2,1        | 5,22E-12 | 1,33E-08   | 5,32E-10  |
| GOTERM_BP_FAT      | GO:0032990~cell part morphogenesis                                              | 105                      | 3,9        | 5,87E-12 | 1,50E-08   | 5,76E-10  |
| GOTERM_BP_FAT      | GO:0007389~pattern specification process                                        | 137                      | 5,1        | 1,46E-11 | 3,71E-08   | 1,37E-09  |
| GOTERM_BP_FAT      | GO:0045449~regulation of transcription                                          | 202                      | 7,5        | 3,08E-11 | 7,85E-08   | 2,80E-09  |
| GOTERM_BP_FAT      | GO:0007435~salivary gland morphogenesis                                         | 49                       | 1,8        | 6,88E-11 | 1,75E-07   | 6,05E-09  |
| GOTERM_BP_FAT      | GO:0022612~gland morphogenesis                                                  | 49                       | 1,8        | 6,88E-11 | 1,75E-07   | 6,05E-09  |
| GOTERM_BP_FAT      | GO:0003002~regionalization                                                      | 129                      | 4,8        | 8,87E-11 | 2,26E-07   | 7,54E-09  |
| GOTERM_BP_FAT      | GO:0007423~sensory organ development                                            | 119                      | 4,4        | 1,26E-10 | 3,21E-07   | 1,03E-08  |
| GOTERM_BP_FAT      | GO:0051252~regulation of RNA metabolic process                                  | 175                      | 6,5        | 1,52E-10 | 3,88E-07   | 1,21E-08  |
| GOTERM_BP_FAT      | GO:0007447~imaginal disc pattern formation                                      | 43                       | 1,6        | 2,53E-10 | 6,45E-07   | 1,95E-08  |
| GOTERM_BP_FAT      | GO:0048736~appendage development                                                | 81                       | 3,0        | 2,89E-10 | 7,36E-07   | 2,16E-08  |
| GOTERM_BP_FAT      | GO:0048737~imaginal disc-derived appendage development                          | 80                       | 3,0        | 3,81E-10 | 9,70E-07   | 2,77E-08  |
| GOTERM_BP_FAT      | GO:0060173~limb development                                                     | 25                       | 0,9        | 6,05E-10 | 1,54E-06   | 4,28E-08  |
| GOTERM_BP_FAT      | GO:0035108~limb morphogenesis                                                   | 25                       | 0,9        | 6,05E-10 | 1,54E-06   | 4,28E-08  |
| GOTERM_BP_FAT      | GO:0048870~cell motility                                                        | 66                       | 2,4        | 6,60E-10 | 1,68E-06   | 4,55E-08  |
| GOTERM_BP_FAT      | GO:0016477~cell migration                                                       | 63                       | 2,3        | 6,87E-10 | 1,75E-06   | 4,61E-08  |
| GOTERM_BP_FAT      | GO:0006355~regulation of transcription, DNA-dependent                           | 159                      | 5,9        | 7,55E-10 | 1,92E-06   | 4,94E-08  |
| GOTERM_BP_FAT      | GO:0035107~appendage morphogenesis                                              | 79                       | 2,9        | 7,78E-10 | 1,98E-06   | 4,96E-08  |
| GOTERM_BP_FAT      | GO:0051674~localization of cell                                                 | 68                       | 2,5        | 8,08E-10 | 2,06E-06   | 5,02E-08  |
| GOTERM_BP_FAT      | GO:0035114~imaginal disc-derived appendage morphogenesis                        | 78                       | 2,9        | 1,03E-09 | 2,61E-06   | 6,22E-08  |
| GOTERM_BP_FAT      | GO:0035110~leg morphogenesis                                                    | 24                       | 0,9        | 2,24E-09 | 5,70E-06   | 1,33E-07  |
| GOTERM_BP_FAT      | GO:0007155~cell adhesion                                                        | 60                       | 2,2        | 1,18E-08 | 3,01E-05   | 6,85E-07  |
| GOTERM_BP_FAT      | GO:0048729~tissue morphogenesis                                                 | 77                       | 2,9        | 1,30E-08 | 3,32E-05   | 7,39E-07  |
| GOTERM_BP_FAT      | GO:0009954~proximal/distal pattern formation                                    | 17                       | 0,6        | 2,19E-08 | 5,59E-05   | 1,22E-06  |
| GOTERM_BP_FAT      | GO:0007478~leg disc morphogenesis                                               | 20                       | 0,7        | 2,36E-08 | 6,01E-05   | 1,28E-06  |
| GOTERM_BP_FAT      | GO:0001708~cell fate specification                                              | 30                       | 1,1        | 2,45E-08 | 6,25E-05   | 1,30E-06  |
| GOTERM_BP_FAT      | GO:0006350~transcription                                                        | 122                      | 4,5        | 2,50E-08 | 6,37E-05   | 1,30E-06  |
| GOTERM_BP_FAT      | GO:0001709~cell fate determination                                              | 48                       | 1,8        | 2,99E-08 | 7,62E-05   | 1,52E-06  |
| GOTERM_BP_FAT      | GO:0007498~mesoderm development                                                 | 38                       | 1,4        | 3,26E-08 | 8,32E-05   | 1,63E-06  |
| GOTERM_BP_FAT      | GO:0007449~proximal/distal pattern formation, imaginal disc                     | 16                       | 0,6        | 3,52E-08 | 8,96E-05   | 1,72E-06  |
| GOTERM_BP_FAT      | GO:0016265~death                                                                | 56                       | 2,1        | 4,50E-08 | 1,15E-04   | 2,16E-06  |
| GOTERM_BP_FAT      | GO:0007166~cell surface receptor linked signal transduction                     | 155                      | 5,7        | 5,62E-08 | 1,43E-04   | 2,65E-06  |
| GOTERM_BP_FAT      | GO:0035120~post-embryonic appendage morphogenesis                               | 71                       | 2,6        | 6,62E-08 | 1,69E-04   | 3,07E-06  |
| GOTERM_BP_FAT      | GO:0012501~programmed cell death                                                | 53                       | 2,0        | 8,03E-08 | 2,05E-04   | 3,65E-06  |
| GOTERM_BP_FAT      | GO:0060541~respiratory system development                                       | 53                       | 2,0        | 8,03E-08 | 2,05E-04   | 3,65E-06  |
| GOTERM_BP_FAT      | GO:0007424~open tracheal system development                                     | 53                       | 2,0        | 8,03E-08 | 2,05E-04   | 3,65E-06  |
| GOTERM_BP_FAT      | GO:0035109~imaginal disc-derived limb morphogenesis                             | 19                       | 0,7        | 8,90E-08 | 2,27E-04   | 3,98E-06  |
| GOTERM_BP_FAT      | GO:0008219~cell death                                                           | 55                       | 2,0        | 9,48E-08 | 2,42E-04   | 4,16E-06  |
| GOTERM_BP_FAT      | GO:0048749~compound eye development                                             | 88                       | 3,3        | 9,93E-08 | 2,53E-04   | 4,29E-06  |
| GOTERM_BP_FAT      | GO:0007507~heart development                                                    | 31                       | 1,1        | 1,10E-07 | 2,81E-04   | 4,69E-06  |
| GOTERM_BP_FAT      | GO:0001654~eye development                                                      | 93                       | 3,4        | 1,13E-07 | 2,88E-04   | 4,72E-06  |
| GOTERM_BP_FAT      | GO:0016337~cell-cell adhesion                                                   | 28                       | 1,0        | 1,31E-07 | 3,35E-04   | 5,41E-06  |
| GOTERM_BP_FAT      | GO:0007156~homophilic cell adhesion                                             | 18                       | 0,7        | 1,61E-07 | 4,09E-04   | 6,50E-06  |
| GOTERM_BP_FAT      | GO:0002009~morphogenesis of an epithelium                                       | 69                       | 2,6        | 1,66E-07 | 4,23E-04   | 6,60E-06  |
| GOTERM_BP_FAT      | GO:0060429~epithelium development                                               | 71                       | 2,6        | 2,03E-07 | 5,18E-04   | 7,98E-06  |
| GOTERM_BP_FAT      | GO:0006357~regulation of transcription from RNA polymerase II promoter          | 61                       | 2,3        | 2,49E-07 | 6,33E-04   | 9,60E-06  |
| GOTERM_BP_FAT      | GO:0022610~biological adhesion                                                  | 60                       | 2,2        | 2,66E-07 | 6,78E-04   | 1,01E-05  |
| GOTERM_BP_FAT      | GO:0007365~periodic partitioning                                                | 26                       | 1,0        | 2,91E-07 | 7,41E-04   | 1,09E-05  |
| GOTERM_BP_FAT      | GO:0007480~imaginal disc-derived leg morphogenesis                              | 18                       | 0,7        | 3,28E-07 | 8,37E-04   | 1,21E-05  |
| GOTERM_BP_FAT      | GO:0035127~post-embryonic limb morphogenesis                                    | 18                       | 0,7        | 3,28E-07 | 8,37E-04   | 1,21E-05  |
| GOTERM_BP_FAT      | GO:0035220~wing disc development                                                | 80                       | 3,0        | 4,83E-07 | 1,23E-03   | 1,76E-05  |
| GOTERM_BP_FAT      | GO:0007548~sex differentiation                                                  | 27                       | 1,0        | 8,38E-07 | 2,13E-03   | 3,01E-05  |
| GOTERM_BP_FAT      | GO:0000122~negative regulation of transcription from RNA polymerase II promoter | 27                       | 1,0        | 1,23E-06 | 3,14E-03   | 4,37E-05  |
| GOTERM_BP_FAT      | GO:0048859~formation of anatomical boundary                                     | 22                       | 0,8        | 1,40E-06 | 3,55E-03   | 4,88E-05  |
| GOTERM_BP_FAT      | GO:0007219~Notch signaling pathway                                              | 26                       | 1,0        | 1,53E-06 | 3,90E-03   | 5,29E-05  |
| GOTERM_BP_FAT      | GO:0035214~eye-antennal disc development                                        | 27                       | 1,0        | 1,79E-06 | 4,56E-03   | 6,10E-05  |
| GOTERM_BP_FAT      | GO:0008038~neuron recognition                                                   | 23                       | 0,9        | 2,85E-06 | 7,24E-03   | 9,56E-05  |
| GOTERM_BP_FAT      | GO:0016055~Wnt receptor signaling pathway                                       | 29                       | 1,1        | 3,14E-06 | 7,98E-03   | 1,04E-04  |
| GOTERM_BP_FAT      | GO:0045596~negative regulation of cell differentiation                          | 30                       | 1,1        | 3,37E-06 | 8,54E-03   | 1,10E-04  |
| GOTERM_BP_FAT      | GO:0007398~ectoderm development                                                 | 28                       | 1,0        | 4,03E-06 | 1,02E-02   | 1,30E-04  |
| GOTERM_BP_FAT      | GO:0008037~cell recognition                                                     | 23                       | 0,9        | 4,30E-06 | 1,09E-02   | 1,37E-04  |
| GOTERM_BP_FAT      | GO:0007479~leg disc proximal/distal pattern formation                           | 12                       | 0,4        | 4,71E-06 | 1,19E-02   | 1,48E-04  |
| GOTERM_BP_FAT      | GO:0035223~leg disc pattern formation                                           | 12                       | 0,4        | 4,71E-06 | 1,19E-02   | 1,48E-04  |

|               |                                                                                                         |     |     |          |          |          |
|---------------|---------------------------------------------------------------------------------------------------------|-----|-----|----------|----------|----------|
| GOTERM_BP_FAT | GO:0048645~organ formation                                                                              | 20  | 0,7 | 4,87E-06 | 1,23E-02 | 1,51E-04 |
| GOTERM_BP_FAT | GO:0007472~wing disc morphogenesis                                                                      | 63  | 2,3 | 7,63E-06 | 1,93E-02 | 2,34E-04 |
| GOTERM_BP_FAT | GO:0001738~morphogenesis of a polarized epithelium                                                      | 28  | 1,0 | 7,70E-06 | 1,94E-02 | 2,34E-04 |
| GOTERM_BP_FAT | GO:0016271~tissue death                                                                                 | 28  | 1,0 | 7,70E-06 | 1,94E-02 | 2,34E-04 |
| GOTERM_BP_FAT | GO:0007559~histolysis                                                                                   | 28  | 1,0 | 7,70E-06 | 1,94E-02 | 2,34E-04 |
| GOTERM_BP_FAT | GO:0010623~developmental programmed cell death                                                          | 11  | 0,4 | 7,77E-06 | 1,96E-02 | 2,33E-04 |
| GOTERM_BP_FAT | GO:0048598~embryonic morphogenesis                                                                      | 64  | 2,4 | 9,48E-06 | 2,39E-02 | 2,81E-04 |
| GOTERM_BP_FAT | GO:0007476~imaginal disc-derived wing morphogenesis                                                     | 62  | 2,3 | 1,15E-05 | 2,90E-02 | 3,38E-04 |
| GOTERM_BP_FAT | GO:0035222~wing disc pattern formation                                                                  | 27  | 1,0 | 1,36E-05 | 3,41E-02 | 3,94E-04 |
| GOTERM_BP_FAT | GO:0042067~establishment of ommatidial polarity                                                         | 21  | 0,8 | 1,46E-05 | 3,65E-02 | 4,17E-04 |
| GOTERM_BP_FAT | GO:0007610~behavior                                                                                     | 105 | 3,9 | 1,62E-05 | 4,05E-02 | 4,59E-04 |
| GOTERM_BP_FAT | GO:0007163~establishment or maintenance of cell polarity                                                | 37  | 1,4 | 1,63E-05 | 4,08E-02 | 4,57E-04 |
| GOTERM_BP_FAT | GO:0001736~establishment of planar polarity                                                             | 25  | 0,9 | 1,65E-05 | 4,12E-02 | 4,58E-04 |
| GOTERM_BP_FAT | GO:0045137~development of primary sexual characteristics                                                | 18  | 0,7 | 1,70E-05 | 4,24E-02 | 4,65E-04 |
| GOTERM_BP_FAT | GO:0007164~establishment of tissue polarity                                                             | 25  | 0,9 | 2,28E-05 | 5,64E-02 | 6,18E-04 |
| GOTERM_BP_FAT | GO:0007626~locomotory behavior                                                                          | 53  | 2,0 | 2,30E-05 | 5,71E-02 | 6,18E-04 |
| GOTERM_BP_FAT | GO:0010160~formation of organ boundary                                                                  | 18  | 0,7 | 4,08E-05 | 9,88E-02 | 1,08E-03 |
| GOTERM_BP_FAT | GO:0035215~genital disc development                                                                     | 15  | 0,6 | 4,27E-05 | 1,03E-01 | 1,12E-03 |
| GOTERM_BP_FAT | GO:0035071~salivary gland cell autophagic cell death                                                    | 26  | 1,0 | 4,32E-05 | 1,04E-01 | 1,12E-03 |
| GOTERM_BP_FAT | GO:0048102~autophagic cell death                                                                        | 26  | 1,0 | 4,32E-05 | 1,04E-01 | 1,12E-03 |
| GOTERM_BP_FAT | GO:0035070~salivary gland histolysis                                                                    | 26  | 1,0 | 4,32E-05 | 1,04E-01 | 1,12E-03 |
| GOTERM_BP_FAT | GO:0051301~cell division                                                                                | 57  | 2,1 | 5,48E-05 | 1,30E-01 | 1,41E-03 |
| GOTERM_BP_FAT | GO:0048565~gut development                                                                              | 27  | 1,0 | 5,74E-05 | 1,36E-01 | 1,46E-03 |
| GOTERM_BP_FAT | GO:0045944~positive regulation of transcription from RNA polymerase II promoter                         | 21  | 0,8 | 6,28E-05 | 1,48E-01 | 1,58E-03 |
| GOTERM_BP_FAT | GO:0001751~compound eye photoreceptor cell differentiation                                              | 36  | 1,3 | 6,38E-05 | 1,50E-01 | 1,59E-03 |
| GOTERM_BP_FAT | GO:0051254~positive regulation of RNA metabolic process                                                 | 31  | 1,1 | 6,70E-05 | 1,57E-01 | 1,66E-03 |
| GOTERM_BP_FAT | GO:0035282~segmentation                                                                                 | 68  | 2,5 | 7,79E-05 | 1,80E-01 | 1,91E-03 |
| GOTERM_BP_FAT | GO:0007469~antennal development                                                                         | 13  | 0,5 | 8,95E-05 | 2,04E-01 | 2,17E-03 |
| GOTERM_BP_FAT | GO:0035285~appendage segmentation                                                                       | 11  | 0,4 | 9,33E-05 | 2,12E-01 | 2,24E-03 |
| GOTERM_BP_FAT | GO:0035286~leg segmentation                                                                             | 11  | 0,4 | 9,33E-05 | 2,12E-01 | 2,24E-03 |
| GOTERM_BP_FAT | GO:0042330~taxis                                                                                        | 19  | 0,7 | 1,03E-04 | 2,31E-01 | 2,45E-03 |
| GOTERM_BP_FAT | GO:0045893~positive regulation of transcription, DNA-dependent                                          | 30  | 1,1 | 1,11E-04 | 2,47E-01 | 2,62E-03 |
| GOTERM_BP_FAT | GO:0046530~photoreceptor cell differentiation                                                           | 39  | 1,4 | 1,34E-04 | 2,89E-01 | 3,12E-03 |
| GOTERM_BP_FAT | GO:0009880~embryonic pattern specification                                                              | 61  | 2,3 | 1,44E-04 | 3,07E-01 | 3,33E-03 |
| GOTERM_BP_FAT | GO:0010942~positive regulation of cell death                                                            | 19  | 0,7 | 1,45E-04 | 3,09E-01 | 3,33E-03 |
| GOTERM_BP_FAT | GO:0043068~positive regulation of programmed cell death                                                 | 19  | 0,7 | 1,45E-04 | 3,09E-01 | 3,33E-03 |
| GOTERM_BP_FAT | GO:0010604~positive regulation of macromolecule metabolic process                                       | 42  | 1,6 | 1,46E-04 | 3,11E-01 | 3,32E-03 |
| GOTERM_BP_FAT | GO:0001754~eye photoreceptor cell differentiation                                                       | 36  | 1,3 | 1,71E-04 | 3,54E-01 | 3,85E-03 |
| GOTERM_BP_FAT | GO:0003006~reproductive developmental process                                                           | 115 | 4,3 | 1,83E-04 | 3,73E-01 | 4,08E-03 |
| GOTERM_BP_FAT | GO:0035295~tube development                                                                             | 32  | 1,2 | 1,89E-04 | 3,83E-01 | 4,19E-03 |
| GOTERM_BP_FAT | GO:0007059~chromosome segregation                                                                       | 36  | 1,3 | 2,06E-04 | 4,09E-01 | 4,52E-03 |
| GOTERM_BP_FAT | GO:0048511~rhythmic process                                                                             | 20  | 0,7 | 2,13E-04 | 4,19E-01 | 4,64E-03 |
| GOTERM_BP_FAT | GO:0048592~eye morphogenesis                                                                            | 68  | 2,5 | 2,31E-04 | 4,44E-01 | 4,97E-03 |
| GOTERM_BP_FAT | GO:0007367~segment polarity determination                                                               | 17  | 0,6 | 2,38E-04 | 4,55E-01 | 5,09E-03 |
| GOTERM_BP_FAT | GO:0001745~compound eye morphogenesis                                                                   | 64  | 2,4 | 2,49E-04 | 4,70E-01 | 5,28E-03 |
| GOTERM_BP_FAT | GO:0035017~cuticle pattern formation                                                                    | 13  | 0,5 | 2,49E-04 | 4,70E-01 | 5,23E-03 |
| GOTERM_BP_FAT | GO:0007422~peripheral nervous system development                                                        | 29  | 1,1 | 2,83E-04 | 5,14E-01 | 5,90E-03 |
| GOTERM_BP_FAT | GO:0007280~pole cell migration                                                                          | 11  | 0,4 | 3,22E-04 | 5,60E-01 | 6,65E-03 |
| GOTERM_BP_FAT | GO:0007350~blastoderm segmentation                                                                      | 57  | 2,1 | 3,22E-04 | 5,60E-01 | 6,60E-03 |
| GOTERM_BP_FAT | GO:0048103~somatic stem cell division                                                                   | 14  | 0,5 | 3,23E-04 | 5,61E-01 | 6,56E-03 |
| GOTERM_BP_FAT | GO:0009968~negative regulation of signal transduction                                                   | 32  | 1,2 | 3,43E-04 | 5,83E-01 | 6,91E-03 |
| GOTERM_BP_FAT | GO:0043067~regulation of programmed cell death                                                          | 34  | 1,3 | 3,51E-04 | 5,92E-01 | 7,03E-03 |
| GOTERM_BP_FAT | GO:0010648~negative regulation of cell communication                                                    | 32  | 1,2 | 4,14E-04 | 6,52E-01 | 8,22E-03 |
| GOTERM_BP_FAT | GO:0007611~learning or memory                                                                           | 26  | 1,0 | 4,18E-04 | 6,56E-01 | 8,24E-03 |
| GOTERM_BP_FAT | GO:0008406~gonad development                                                                            | 14  | 0,5 | 4,84E-04 | 7,09E-01 | 9,44E-03 |
| GOTERM_BP_FAT | GO:0048608~reproductive structure development                                                           | 14  | 0,5 | 4,84E-04 | 7,09E-01 | 9,44E-03 |
| GOTERM_BP_FAT | GO:0007450~dorsal/ventral pattern formation, imaginal disc                                              | 21  | 0,8 | 5,04E-04 | 7,23E-01 | 9,75E-03 |
| GOTERM_BP_FAT | GO:0007623~circadian rhythm                                                                             | 19  | 0,7 | 5,05E-04 | 7,24E-01 | 9,70E-03 |
| GOTERM_BP_FAT | GO:0016198~axon choice point recognition                                                                | 11  | 0,4 | 5,49E-04 | 7,53E-01 | 1,05E-02 |
| GOTERM_BP_FAT | GO:0035051~cardiac cell differentiation                                                                 | 11  | 0,4 | 5,49E-04 | 7,53E-01 | 1,05E-02 |
| GOTERM_BP_FAT | GO:0008354~germ cell migration                                                                          | 16  | 0,6 | 6,08E-04 | 7,88E-01 | 1,15E-02 |
| GOTERM_BP_FAT | GO:0046668~regulation of retinal cell programmed cell death                                             | 10  | 0,4 | 6,14E-04 | 7,91E-01 | 1,15E-02 |
| GOTERM_BP_FAT | GO:0035290~trunk segmentation                                                                           | 10  | 0,4 | 6,14E-04 | 7,91E-01 | 1,15E-02 |
| GOTERM_BP_FAT | GO:0050890~cognition                                                                                    | 82  | 3,0 | 6,75E-04 | 8,21E-01 | 1,26E-02 |
| GOTERM_BP_FAT | GO:0010941~regulation of cell death                                                                     | 34  | 1,3 | 7,07E-04 | 8,35E-01 | 1,31E-02 |
| GOTERM_BP_FAT | GO:0007419~ventral cord development                                                                     | 14  | 0,5 | 7,09E-04 | 8,36E-01 | 1,30E-02 |
| GOTERM_BP_FAT | GO:0010557~positive regulation of macromolecule biosynthetic process                                    | 37  | 1,4 | 7,34E-04 | 8,46E-01 | 1,34E-02 |
| GOTERM_BP_FAT | GO:0045941~positive regulation of transcription                                                         | 34  | 1,3 | 8,35E-04 | 8,81E-01 | 1,51E-02 |
| GOTERM_BP_FAT | GO:0007612~learning                                                                                     | 20  | 0,7 | 8,60E-04 | 8,88E-01 | 1,54E-02 |
| GOTERM_BP_FAT | GO:0017145~stem cell division                                                                           | 19  | 0,7 | 8,76E-04 | 8,93E-01 | 1,56E-02 |
| GOTERM_BP_FAT | GO:0051173~positive regulation of nitrogen compound metabolic process                                   | 35  | 1,3 | 8,92E-04 | 8,97E-01 | 1,58E-02 |
| GOTERM_BP_FAT | GO:0045935~positive regulation of nucleobase, nucleoside, nucleotide and nucleic acid metabolic process | 35  | 1,3 | 8,92E-04 | 8,97E-01 | 1,58E-02 |
| GOTERM_BP_FAT | GO:0014016~neuroblast differentiation                                                                   | 13  | 0,5 | 8,98E-04 | 8,99E-01 | 1,58E-02 |
| GOTERM_BP_FAT | GO:0010628~positive regulation of gene expression                                                       | 34  | 1,3 | 9,82E-04 | 9,18E-01 | 1,71E-02 |
| GOTERM_BP_FAT | GO:0043473~pigmentation                                                                                 | 22  | 0,8 | 1,01E-03 | 9,24E-01 | 1,75E-02 |
| GOTERM_BP_FAT | GO:0007622~rhythmic behavior                                                                            | 16  | 0,6 | 1,14E-03 | 9,45E-01 | 1,96E-02 |
| GOTERM_BP_FAT | GO:0008544~epidermis development                                                                        | 18  | 0,7 | 1,16E-03 | 9,48E-01 | 1,97E-02 |
| GOTERM_BP_FAT | GO:0055057~neuroblast division                                                                          | 11  | 0,4 | 1,40E-03 | 9,72E-01 | 2,37E-02 |
| GOTERM_BP_FAT | GO:0055059~asymmetric neuroblast division                                                               | 11  | 0,4 | 1,40E-03 | 9,72E-01 | 2,37E-02 |
| GOTERM_BP_FAT | GO:0048534~hemopoietic or lymphoid organ development                                                    | 20  | 0,7 | 1,40E-03 | 9,72E-01 | 2,36E-02 |
| GOTERM_BP_FAT | GO:0002520~immune system development                                                                    | 20  | 0,7 | 1,40E-03 | 9,72E-01 | 2,36E-02 |
| GOTERM_BP_FAT | GO:0008258~head involution                                                                              | 18  | 0,7 | 1,50E-03 | 9,78E-01 | 2,51E-02 |
| GOTERM_BP_FAT | GO:0007379~segment specification                                                                        | 17  | 0,6 | 1,53E-03 | 9,80E-01 | 2,53E-02 |
| GOTERM_BP_FAT | GO:0035277~spiracle morphogenesis, open tracheal system                                                 | 10  | 0,4 | 1,70E-03 | 9,87E-01 | 2,80E-02 |
| GOTERM_BP_FAT | GO:0007517~muscle organ development                                                                     | 38  | 1,4 | 1,85E-03 | 9,91E-01 | 3,02E-02 |
| GOTERM_BP_FAT | GO:0006468~protein amino acid phosphorylation                                                           | 62  | 2,3 | 1,93E-03 | 9,93E-01 | 3,13E-02 |
| GOTERM_BP_FAT | GO:0007405~neuroblast proliferation                                                                     | 14  | 0,5 | 1,96E-03 | 9,93E-01 | 3,16E-02 |
| GOTERM_BP_FAT | GO:0048512~circadian behavior                                                                           | 15  | 0,6 | 2,01E-03 | 9,94E-01 | 3,22E-02 |
| GOTERM_BP_FAT | GO:0008052~sensory organ boundary specification                                                         | 11  | 0,4 | 2,11E-03 | 9,95E-01 | 3,35E-02 |
| GOTERM_BP_FAT | GO:0051345~positive regulation of hydrolase activity                                                    | 11  | 0,4 | 2,11E-03 | 9,95E-01 | 3,35E-02 |
| GOTERM_BP_FAT | GO:0007017~microtubule-based process                                                                    | 90  | 3,3 | 2,23E-03 | 9,97E-01 | 3,52E-02 |
| GOTERM_BP_FAT | GO:0014017~neuroblast fate commitment                                                                   | 12  | 0,4 | 2,40E-03 | 9,98E-01 | 3,75E-02 |
| GOTERM_BP_FAT | GO:0045448~mitotic cell cycle, embryonic                                                                | 12  | 0,4 | 2,40E-03 | 9,98E-01 | 3,75E-02 |
| GOTERM_BP_FAT | GO:0010721~negative regulation of cell development                                                      | 10  | 0,4 | 2,64E-03 | 9,99E-01 | 4,11E-02 |
| GOTERM_BP_FAT | GO:0042659~regulation of cell fate specification                                                        | 10  | 0,4 | 2,64E-03 | 9,99E-01 | 4,11E-02 |

|               |                                                                                                         |     |     |          |          |          |
|---------------|---------------------------------------------------------------------------------------------------------|-----|-----|----------|----------|----------|
| GOTERM_BP_FAT | GO:0010453~regulation of cell fate commitment                                                           | 10  | 0,4 | 2,64E-03 | 9,99E-01 | 4,11E-02 |
| GOTERM_BP_FAT | GO:0030178~negative regulation of Wnt receptor signaling pathway                                        | 10  | 0,4 | 2,64E-03 | 9,99E-01 | 4,11E-02 |
| GOTERM_BP_FAT | GO:0007448~anterior/posterior pattern formation, imaginal disc                                          | 10  | 0,4 | 2,64E-03 | 9,99E-01 | 4,11E-02 |
| GOTERM_BP_FAT | GO:0007455~eye-antennal disc morphogenesis                                                              | 15  | 0,6 | 2,67E-03 | 9,99E-01 | 4,12E-02 |
| GOTERM_BP_FAT | GO:0009891~positive regulation of biosynthetic process                                                  | 40  | 1,5 | 2,87E-03 | 9,99E-01 | 4,39E-02 |
| GOTERM_BP_FAT | GO:0031328~positive regulation of cellular biosynthetic process                                         | 40  | 1,5 | 2,87E-03 | 9,99E-01 | 4,39E-02 |
| GOTERM_BP_FAT | GO:0048542~lymph gland development                                                                      | 11  | 0,4 | 3,09E-03 | 1,00E+00 | 4,70E-02 |
| GOTERM_BP_FAT | GO:0042063~gliogenesis                                                                                  | 17  | 0,6 | 3,26E-03 | 1,00E+00 | 4,93E-02 |
| GOTERM_BP_FAT | GO:0055123~digestive system development                                                                 | 17  | 0,6 | 3,26E-03 | 1,00E+00 | 4,93E-02 |
| GOTERM_BP_FAT | GO:0048546~digestive tract morphogenesis                                                                | 17  | 0,6 | 3,26E-03 | 1,00E+00 | 4,93E-02 |
| GOTERM_BP_FAT | GO:0042981~regulation of apoptosis                                                                      | 28  | 1,0 | 3,35E-03 | 1,00E+00 | 5,02E-02 |
| GOTERM_BP_FAT | GO:0007494~midgut development                                                                           | 12  | 0,4 | 3,37E-03 | 1,00E+00 | 5,02E-02 |
| GOTERM_BP_FAT | GO:0009913~epidermal cell differentiation                                                               | 14  | 0,5 | 3,54E-03 | 1,00E+00 | 5,24E-02 |
| GOTERM_BP_FAT | GO:0045132~meiotic chromosome segregation                                                               | 19  | 0,7 | 3,63E-03 | 1,00E+00 | 5,34E-02 |
| GOTERM_BP_FAT | GO:0035239~tube morphogenesis                                                                           | 25  | 0,9 | 3,82E-03 | 1,00E+00 | 5,58E-02 |
| GOTERM_BP_FAT | GO:0035287~head segmentation                                                                            | 10  | 0,4 | 3,96E-03 | 1,00E+00 | 5,74E-02 |
| GOTERM_BP_FAT | GO:0046700~heterocycle catabolic process                                                                | 10  | 0,4 | 3,96E-03 | 1,00E+00 | 5,74E-02 |
| GOTERM_BP_FAT | GO:0051726~regulation of cell cycle                                                                     | 42  | 1,6 | 4,19E-03 | 1,00E+00 | 6,03E-02 |
| GOTERM_BP_FAT | GO:0048589~developmental growth                                                                         | 24  | 0,9 | 4,20E-03 | 1,00E+00 | 6,02E-02 |
| GOTERM_BP_FAT | GO:0008593~regulation of Notch signaling pathway                                                        | 11  | 0,4 | 4,40E-03 | 1,00E+00 | 6,25E-02 |
| GOTERM_BP_FAT | GO:0010631~epithelial cell migration                                                                    | 12  | 0,4 | 4,63E-03 | 1,00E+00 | 6,53E-02 |
| GOTERM_BP_FAT | GO:0007427~epithelial cell migration, open tracheal system                                              | 12  | 0,4 | 4,63E-03 | 1,00E+00 | 6,53E-02 |
| GOTERM_BP_FAT | GO:0016481~negative regulation of transcription                                                         | 50  | 1,9 | 4,63E-03 | 1,00E+00 | 6,50E-02 |
| GOTERM_BP_FAT | GO:0019827~stem cell maintenance                                                                        | 13  | 0,5 | 4,70E-03 | 1,00E+00 | 6,55E-02 |
| GOTERM_BP_FAT | GO:0048663~neuron fate commitment                                                                       | 18  | 0,7 | 4,81E-03 | 1,00E+00 | 6,67E-02 |
| GOTERM_BP_FAT | GO:0051172~negative regulation of nitrogen compound metabolic process                                   | 53  | 2,0 | 4,98E-03 | 1,00E+00 | 6,86E-02 |
| GOTERM_BP_FAT | GO:0045934~negative regulation of nucleobase, nucleoside, nucleotide and nucleic acid metabolic process | 53  | 2,0 | 4,98E-03 | 1,00E+00 | 6,86E-02 |
| GOTERM_BP_FAT | GO:0007293~germarium-derived egg chamber formation                                                      | 20  | 0,7 | 5,03E-03 | 1,00E+00 | 6,89E-02 |
| GOTERM_BP_FAT | GO:0048190~wing disc dorsal/ventral pattern formation                                                   | 17  | 0,6 | 5,15E-03 | 1,00E+00 | 7,01E-02 |
| GOTERM_BP_FAT | GO:0007439~ectodermal gut development                                                                   | 16  | 0,6 | 5,47E-03 | 1,00E+00 | 7,40E-02 |
| GOTERM_BP_FAT | GO:0048567~ectodermal gut morphogenesis                                                                 | 16  | 0,6 | 5,47E-03 | 1,00E+00 | 7,40E-02 |
| GOTERM_BP_FAT | GO:0007442~hindgut morphogenesis                                                                        | 15  | 0,6 | 5,77E-03 | 1,00E+00 | 7,74E-02 |
| GOTERM_BP_FAT | GO:0022416~bristle development                                                                          | 18  | 0,7 | 5,92E-03 | 1,00E+00 | 7,89E-02 |
| GOTERM_BP_FAT | GO:0016331~morphogenesis of embryonic epithelium                                                        | 32  | 1,2 | 5,98E-03 | 1,00E+00 | 7,93E-02 |
| GOTERM_BP_FAT | GO:0051276~chromosome organization                                                                      | 64  | 2,4 | 6,04E-03 | 1,00E+00 | 7,96E-02 |
| GOTERM_BP_FAT | GO:0042335~cuticle development                                                                          | 20  | 0,7 | 6,07E-03 | 1,00E+00 | 7,97E-02 |
| GOTERM_BP_FAT | GO:0048864~stem cell development                                                                        | 13  | 0,5 | 6,19E-03 | 1,00E+00 | 8,07E-02 |
| GOTERM_BP_FAT | GO:0035316~non-sensory hair organization                                                                | 13  | 0,5 | 6,19E-03 | 1,00E+00 | 8,07E-02 |
| GOTERM_BP_FAT | GO:0012502~induction of programmed cell death                                                           | 13  | 0,5 | 6,19E-03 | 1,00E+00 | 8,07E-02 |
| GOTERM_BP_FAT | GO:0048863~stem cell differentiation                                                                    | 13  | 0,5 | 6,19E-03 | 1,00E+00 | 8,07E-02 |
| GOTERM_BP_FAT | GO:0035315~hair cell differentiation                                                                    | 13  | 0,5 | 6,19E-03 | 1,00E+00 | 8,07E-02 |
| GOTERM_BP_FAT | GO:0046552~photoreceptor cell fate commitment                                                           | 17  | 0,6 | 6,38E-03 | 1,00E+00 | 8,26E-02 |
| GOTERM_BP_FAT | GO:0007297~ovarian follicle cell migration                                                              | 23  | 0,9 | 6,47E-03 | 1,00E+00 | 8,34E-02 |
| GOTERM_BP_FAT | GO:0007283~spermatogenesis                                                                              | 39  | 1,4 | 6,49E-03 | 1,00E+00 | 8,32E-02 |
| GOTERM_BP_FAT | GO:0048232~male gamete generation                                                                       | 39  | 1,4 | 6,49E-03 | 1,00E+00 | 8,32E-02 |
| GOTERM_BP_FAT | GO:0050877~neurological system process                                                                  | 113 | 4,2 | 6,55E-03 | 1,00E+00 | 8,35E-02 |
| GOTERM_BP_FAT | GO:0008407~bristle morphogenesis                                                                        | 16  | 0,6 | 6,84E-03 | 1,00E+00 | 8,66E-02 |
| GOTERM_BP_FAT | GO:0001752~compound eye photoreceptor fate commitment                                                   | 16  | 0,6 | 6,84E-03 | 1,00E+00 | 8,66E-02 |
| GOTERM_BP_FAT | GO:0048547~gut morphogenesis                                                                            | 16  | 0,6 | 6,84E-03 | 1,00E+00 | 8,66E-02 |
| GOTERM_BP_FAT | GO:0042706~eye photoreceptor cell fate commitment                                                       | 16  | 0,6 | 6,84E-03 | 1,00E+00 | 8,66E-02 |
| GOTERM_BP_FAT | GO:0048813~dendrite morphogenesis                                                                       | 31  | 1,1 | 7,58E-03 | 1,00E+00 | 9,51E-02 |
| GOTERM_BP_FAT | GO:0016358~dendrite development                                                                         | 31  | 1,1 | 7,58E-03 | 1,00E+00 | 9,51E-02 |
| GOTERM_BP_FAT | GO:0048066~pigmentation during development                                                              | 19  | 0,7 | 7,99E-03 | 1,00E+00 | 9,95E-02 |
| GOTERM_BP_FAT | GO:0033157~regulation of intracellular protein transport                                                | 12  | 0,4 | 8,25E-03 | 1,00E+00 | 1,02E-01 |
| GOTERM_BP_FAT | GO:0045475~locomotor rhythm                                                                             | 11  | 0,4 | 8,29E-03 | 1,00E+00 | 1,02E-01 |
| GOTERM_BP_FAT | GO:0007298~border follicle cell migration                                                               | 20  | 0,7 | 8,69E-03 | 1,00E+00 | 1,06E-01 |
| GOTERM_BP_FAT | GO:0030707~ovarian follicle cell development                                                            | 48  | 1,8 | 9,24E-03 | 1,00E+00 | 1,12E-01 |
| GOTERM_BP_FAT | GO:0042051~compound eye photoreceptor development                                                       | 17  | 0,6 | 9,54E-03 | 1,00E+00 | 1,15E-01 |
| GOTERM_BP_FAT | GO:0007391~dorsal closure                                                                               | 26  | 1,0 | 1,00E-02 | 1,00E+00 | 1,20E-01 |
| GOTERM_BP_FAT | GO:0008356~asymmetric cell division                                                                     | 18  | 0,7 | 1,05E-02 | 1,00E+00 | 1,25E-01 |
| GOTERM_BP_FAT | GO:0001667~ameboidal cell migration                                                                     | 12  | 0,4 | 1,07E-02 | 1,00E+00 | 1,27E-01 |
| GOTERM_BP_FAT | GO:0043632~modification-dependent macromolecule catabolic process                                       | 41  | 1,5 | 1,09E-02 | 1,00E+00 | 1,28E-01 |
| GOTERM_BP_FAT | GO:0042752~regulation of circadian rhythm                                                               | 11  | 0,4 | 1,10E-02 | 1,00E+00 | 1,29E-01 |
| GOTERM_BP_FAT | GO:0030855~epithelial cell differentiation                                                              | 10  | 0,4 | 1,10E-02 | 1,00E+00 | 1,28E-01 |
| GOTERM_BP_FAT | GO:0007167~enzyme linked receptor protein signaling pathway                                             | 36  | 1,3 | 1,12E-02 | 1,00E+00 | 1,29E-01 |
| GOTERM_BP_FAT | GO:0042461~photoreceptor cell development                                                               | 19  | 0,7 | 1,14E-02 | 1,00E+00 | 1,31E-01 |
| GOTERM_BP_FAT | GO:0007143~female meiosis                                                                               | 19  | 0,7 | 1,14E-02 | 1,00E+00 | 1,31E-01 |
| GOTERM_BP_FAT | GO:0006915~apoptosis                                                                                    | 22  | 0,8 | 1,15E-02 | 1,00E+00 | 1,32E-01 |
| GOTERM_BP_FAT | GO:0042462~eye photoreceptor cell development                                                           | 17  | 0,6 | 1,15E-02 | 1,00E+00 | 1,31E-01 |
| GOTERM_BP_FAT | GO:0031327~negative regulation of cellular biosynthetic process                                         | 56  | 2,1 | 1,24E-02 | 1,00E+00 | 1,40E-01 |
| GOTERM_BP_FAT | GO:0009890~negative regulation of biosynthetic process                                                  | 56  | 2,1 | 1,24E-02 | 1,00E+00 | 1,40E-01 |
| GOTERM_BP_FAT | GO:0060284~regulation of cell development                                                               | 33  | 1,2 | 1,25E-02 | 1,00E+00 | 1,40E-01 |
| GOTERM_BP_FAT | GO:0007010~cytoskeleton organization                                                                    | 96  | 3,6 | 1,31E-02 | 1,00E+00 | 1,46E-01 |
| GOTERM_BP_FAT | GO:0009792~embryonic development ending in birth or egg hatching                                        | 51  | 1,9 | 1,37E-02 | 1,00E+00 | 1,51E-01 |
| GOTERM_BP_FAT | GO:0070201~regulation of establishment of protein localization                                          | 12  | 0,4 | 1,38E-02 | 1,00E+00 | 1,51E-01 |
| GOTERM_BP_FAT | GO:0035317~imaginal disc-derived wing hair organization                                                 | 12  | 0,4 | 1,38E-02 | 1,00E+00 | 1,51E-01 |
| GOTERM_BP_FAT | GO:0051223~regulation of protein transport                                                              | 12  | 0,4 | 1,38E-02 | 1,00E+00 | 1,51E-01 |
| GOTERM_BP_FAT | GO:0046822~regulation of nucleocytoplasmic transport                                                    | 12  | 0,4 | 1,38E-02 | 1,00E+00 | 1,51E-01 |
| GOTERM_BP_FAT | GO:0008283~cell proliferation                                                                           | 32  | 1,2 | 1,39E-02 | 1,00E+00 | 1,53E-01 |
| GOTERM_BP_FAT | GO:0001700~embryonic development via the syncytial blastoderm                                           | 49  | 1,8 | 1,42E-02 | 1,00E+00 | 1,54E-01 |
| GOTERM_BP_FAT | GO:0051603~proteolysis involved in cellular protein catabolic process                                   | 43  | 1,6 | 1,42E-02 | 1,00E+00 | 1,54E-01 |
| GOTERM_BP_FAT | GO:0044257~cellular protein catabolic process                                                           | 43  | 1,6 | 1,42E-02 | 1,00E+00 | 1,54E-01 |
| GOTERM_BP_FAT | GO:0007400~neuroblast fate determination                                                                | 10  | 0,4 | 1,48E-02 | 1,00E+00 | 1,59E-01 |
| GOTERM_BP_FAT | GO:0016318~ommatidial rotation                                                                          | 10  | 0,4 | 1,48E-02 | 1,00E+00 | 1,59E-01 |
| GOTERM_BP_FAT | GO:0010558~negative regulation of macromolecule biosynthetic process                                    | 55  | 2,0 | 1,48E-02 | 1,00E+00 | 1,59E-01 |
| GOTERM_BP_FAT | GO:0042692~muscle cell differentiation                                                                  | 21  | 0,8 | 1,49E-02 | 1,00E+00 | 1,59E-01 |
| GOTERM_BP_FAT | GO:0007346~regulation of mitotic cell cycle                                                             | 26  | 1,0 | 1,49E-02 | 1,00E+00 | 1,58E-01 |
| GOTERM_BP_FAT | GO:0015837~amine transport                                                                              | 14  | 0,5 | 1,50E-02 | 1,00E+00 | 1,58E-01 |
| GOTERM_BP_FAT | GO:0006793~phosphorus metabolic process                                                                 | 111 | 4,1 | 1,54E-02 | 1,00E+00 | 1,62E-01 |
| GOTERM_BP_FAT | GO:0006796~phosphate metabolic process                                                                  | 111 | 4,1 | 1,54E-02 | 1,00E+00 | 1,62E-01 |
| GOTERM_BP_FAT | GO:0035152~regulation of tube architecture, open tracheal system                                        | 13  | 0,5 | 1,62E-02 | 1,00E+00 | 1,69E-01 |
| GOTERM_BP_FAT | GO:0032880~regulation of protein localization                                                           | 13  | 0,5 | 1,62E-02 | 1,00E+00 | 1,69E-01 |
| GOTERM_BP_FAT | GO:0019941~modification-dependent protein catabolic process                                             | 40  | 1,5 | 1,62E-02 | 1,00E+00 | 1,69E-01 |
| GOTERM_BP_FAT | GO:0007018~microtubule-based movement                                                                   | 27  | 1,0 | 1,71E-02 | 1,00E+00 | 1,76E-01 |
| GOTERM_BP_FAT | GO:0032386~regulation of intracellular transport                                                        | 12  | 0,4 | 1,74E-02 | 1,00E+00 | 1,78E-01 |

|               |                                                                             |     |      |          |          |          |
|---------------|-----------------------------------------------------------------------------|-----|------|----------|----------|----------|
| GOTERM_BP_FAT | GO:0030097~hemopoiesis                                                      | 14  | 0,5  | 1,83E-02 | 1,00E+00 | 1,86E-01 |
| GOTERM_BP_FAT | GO:0042306~regulation of protein import into nucleus                        | 11  | 0,4  | 1,85E-02 | 1,00E+00 | 1,87E-01 |
| GOTERM_BP_FAT | GO:0009953~dorsal/ventral pattern formation                                 | 33  | 1,2  | 1,92E-02 | 1,00E+00 | 1,92E-01 |
| GOTERM_BP_FAT | GO:0007635~chemosensory behavior                                            | 28  | 1,0  | 1,94E-02 | 1,00E+00 | 1,93E-01 |
| GOTERM_BP_FAT | GO:0040007~growth                                                           | 28  | 1,0  | 1,94E-02 | 1,00E+00 | 1,93E-01 |
| GOTERM_BP_FAT | GO:0048610~reproductive cellular process                                    | 101 | 3,7  | 1,98E-02 | 1,00E+00 | 1,96E-01 |
| GOTERM_BP_FAT | GO:0008355~olfactory learning                                               | 15  | 0,6  | 2,01E-02 | 1,00E+00 | 1,98E-01 |
| GOTERM_BP_FAT | GO:0006508~proteolysis                                                      | 142 | 5,3  | 2,07E-02 | 1,00E+00 | 2,03E-01 |
| GOTERM_BP_FAT | GO:0050767~regulation of neurogenesis                                       | 19  | 0,7  | 2,15E-02 | 1,00E+00 | 2,09E-01 |
| GOTERM_BP_FAT | GO:0046942~carboxylic acid transport                                        | 16  | 0,6  | 2,16E-02 | 1,00E+00 | 2,10E-01 |
| GOTERM_BP_FAT | GO:0015849~organic acid transport                                           | 16  | 0,6  | 2,16E-02 | 1,00E+00 | 2,10E-01 |
| GOTERM_BP_FAT | GO:0043065~positive regulation of apoptosis                                 | 12  | 0,4  | 2,17E-02 | 1,00E+00 | 2,09E-01 |
| GOTERM_BP_FAT | GO:0044265~cellular macromolecule catabolic process                         | 50  | 1,9  | 2,25E-02 | 1,00E+00 | 2,15E-01 |
| GOTERM_BP_FAT | GO:0030111~regulation of Wnt receptor signaling pathway                     | 11  | 0,4  | 2,33E-02 | 1,00E+00 | 2,22E-01 |
| GOTERM_BP_FAT | GO:0006865~amino acid transport                                             | 13  | 0,5  | 2,43E-02 | 1,00E+00 | 2,29E-01 |
| GOTERM_BP_FAT | GO:0048332~mesoderm morphogenesis                                           | 10  | 0,4  | 2,49E-02 | 1,00E+00 | 2,33E-01 |
| GOTERM_BP_FAT | GO:0030163~protein catabolic process                                        | 45  | 1,7  | 2,50E-02 | 1,00E+00 | 2,34E-01 |
| GOTERM_BP_FAT | GO:0006325~chromatin organization                                           | 39  | 1,4  | 2,82E-02 | 1,00E+00 | 2,58E-01 |
| GOTERM_BP_FAT | GO:0000278~mitotic cell cycle                                               | 74  | 2,7  | 2,85E-02 | 1,00E+00 | 2,60E-01 |
| GOTERM_BP_FAT | GO:0043062~extracellular structure organization                             | 19  | 0,7  | 2,86E-02 | 1,00E+00 | 2,60E-01 |
| GOTERM_BP_FAT | GO:0009057~macromolecule catabolic process                                  | 59  | 2,2  | 2,96E-02 | 1,00E+00 | 2,66E-01 |
| GOTERM_BP_FAT | GO:0007169~transmembrane receptor protein tyrosine kinase signaling pathway | 27  | 1,0  | 3,01E-02 | 1,00E+00 | 2,70E-01 |
| GOTERM_BP_FAT | GO:0010629~negative regulation of gene expression                           | 55  | 2,0  | 3,07E-02 | 1,00E+00 | 2,73E-01 |
| GOTERM_BP_FAT | GO:0016333~morphogenesis of follicular epithelium                           | 10  | 0,4  | 3,15E-02 | 1,00E+00 | 2,78E-01 |
| GOTERM_BP_FAT | GO:0030031~cell projection assembly                                         | 18  | 0,7  | 3,20E-02 | 1,00E+00 | 2,82E-01 |
| GOTERM_BP_FAT | GO:0051253~negative regulation of RNA metabolic process                     | 43  | 1,6  | 3,31E-02 | 1,00E+00 | 2,89E-01 |
| GOTERM_BP_FAT | GO:0009967~positive regulation of signal transduction                       | 15  | 0,6  | 3,34E-02 | 1,00E+00 | 2,90E-01 |
| GOTERM_BP_FAT | GO:0010605~negative regulation of macromolecule metabolic process           | 66  | 2,4  | 3,35E-02 | 1,00E+00 | 2,89E-01 |
| GOTERM_BP_FAT | GO:0042048~olfactory behavior                                               | 24  | 0,9  | 3,40E-02 | 1,00E+00 | 2,92E-01 |
| GOTERM_BP_FAT | GO:0060562~epithelial tube morphogenesis                                    | 13  | 0,5  | 3,52E-02 | 1,00E+00 | 3,00E-01 |
| GOTERM_BP_FAT | GO:0051783~regulation of nuclear division                                   | 13  | 0,5  | 3,52E-02 | 1,00E+00 | 3,00E-01 |
| GOTERM_BP_FAT | GO:0001763~morphogenesis of a branching structure                           | 13  | 0,5  | 3,52E-02 | 1,00E+00 | 3,00E-01 |
| GOTERM_BP_FAT | GO:0007088~regulation of mitosis                                            | 13  | 0,5  | 3,52E-02 | 1,00E+00 | 3,00E-01 |
| GOTERM_BP_FAT | GO:0007224~smoothened signaling pathway                                     | 11  | 0,4  | 3,57E-02 | 1,00E+00 | 3,03E-01 |
| GOTERM_BP_FAT | GO:0048634~regulation of muscle development                                 | 11  | 0,4  | 3,57E-02 | 1,00E+00 | 3,03E-01 |
| GOTERM_BP_FAT | GO:0016310~phosphorylation                                                  | 85  | 3,2  | 3,98E-02 | 1,00E+00 | 3,31E-01 |
| GOTERM_BP_FAT | GO:0006470~protein amino acid dephosphorylation                             | 21  | 0,8  | 4,27E-02 | 1,00E+00 | 3,49E-01 |
| GOTERM_BP_FAT | GO:0016321~female meiosis chromosome segregation                            | 11  | 0,4  | 4,34E-02 | 1,00E+00 | 3,53E-01 |
| GOTERM_BP_FAT | GO:0007276~gamete generation                                                | 136 | 5,0  | 4,35E-02 | 1,00E+00 | 3,52E-01 |
| GOTERM_BP_FAT | GO:0010647~positive regulation of cell communication                        | 15  | 0,6  | 4,52E-02 | 1,00E+00 | 3,63E-01 |
| GOTERM_BP_FAT | GO:0040008~regulation of growth                                             | 25  | 0,9  | 4,64E-02 | 1,00E+00 | 3,69E-01 |
| GOTERM_BP_FAT | GO:0048754~branching morphogenesis of a tube                                | 12  | 0,4  | 4,66E-02 | 1,00E+00 | 3,69E-01 |
| GOTERM_BP_FAT | GO:0060446~branching involved in open tracheal system development           | 12  | 0,4  | 4,66E-02 | 1,00E+00 | 3,69E-01 |
| GOTERM_BP_FAT | GO:0045892~negative regulation of transcription, DNA-dependent              | 41  | 1,5  | 4,69E-02 | 1,00E+00 | 3,70E-01 |
| GOTERM_BP_FAT | GO:0009628~response to abiotic stimulus                                     | 46  | 1,7  | 4,75E-02 | 1,00E+00 | 3,73E-01 |
| GOTERM_BP_FAT | GO:0019953~sexual reproduction                                              | 139 | 5,2  | 4,80E-02 | 1,00E+00 | 3,75E-01 |
| GOTERM_BP_FAT | GO:0048588~developmental cell growth                                        | 10  | 0,4  | 4,80E-02 | 1,00E+00 | 3,74E-01 |
| GOTERM_BP_FAT | GO:0034329~cell junction assembly                                           | 10  | 0,4  | 4,80E-02 | 1,00E+00 | 3,74E-01 |
| GOTERM_BP_FAT | GO:0007067~mitosis                                                          | 33  | 1,2  | 5,25E-02 | 1,00E+00 | 4,00E-01 |
| GOTERM_BP_FAT | GO:0007600~sensory perception                                               | 57  | 2,1  | 5,44E-02 | 1,00E+00 | 4,10E-01 |
| GOTERM_BP_FAT | GO:0048638~regulation of developmental growth                               | 12  | 0,4  | 5,50E-02 | 1,00E+00 | 4,13E-01 |
| GOTERM_BP_FAT | GO:0007127~meiosis I                                                        | 13  | 0,5  | 5,72E-02 | 1,00E+00 | 4,24E-01 |
| GOTERM_BP_FAT | GO:0051960~regulation of nervous system development                         | 22  | 0,8  | 5,88E-02 | 1,00E+00 | 4,32E-01 |
| GOTERM_BP_FAT | GO:0000910~cytokinesis                                                      | 20  | 0,7  | 6,00E-02 | 1,00E+00 | 4,38E-01 |
| GOTERM_BP_FAT | GO:0008361~regulation of cell size                                          | 19  | 0,7  | 6,04E-02 | 1,00E+00 | 4,39E-01 |
| GOTERM_BP_FAT | GO:0051146~striated muscle cell differentiation                             | 17  | 0,6  | 6,06E-02 | 1,00E+00 | 4,39E-01 |
| GOTERM_BP_FAT | GO:0000087~M phase of mitotic cell cycle                                    | 33  | 1,2  | 6,16E-02 | 1,00E+00 | 4,43E-01 |
| GOTERM_BP_FAT | GO:0000280~nuclear division                                                 | 33  | 1,2  | 6,16E-02 | 1,00E+00 | 4,43E-01 |
| GOTERM_BP_FAT | GO:0007613~memory                                                           | 11  | 0,4  | 6,18E-02 | 1,00E+00 | 4,43E-01 |
| GOTERM_BP_FAT | GO:0007173~epidermal growth factor receptor signaling pathway               | 11  | 0,4  | 6,18E-02 | 1,00E+00 | 4,43E-01 |
| GOTERM_BP_FAT | GO:0006511~ubiquitin-dependent protein catabolic process                    | 23  | 0,9  | 6,41E-02 | 1,00E+00 | 4,54E-01 |
| GOTERM_BP_FAT | GO:0016568~chromatin modification                                           | 26  | 1,0  | 6,65E-02 | 1,00E+00 | 4,66E-01 |
| GOTERM_BP_FAT | GO:0051336~regulation of hydrolase activity                                 | 18  | 0,7  | 6,79E-02 | 1,00E+00 | 4,72E-01 |
| GOTERM_BP_FAT | GO:0007474~imaginal disc-derived wing vein specification                    | 10  | 0,4  | 6,94E-02 | 1,00E+00 | 4,78E-01 |
| GOTERM_BP_FAT | GO:0048619~embryonic hindgut morphogenesis                                  | 10  | 0,4  | 6,94E-02 | 1,00E+00 | 4,78E-01 |
| GOTERM_BP_FAT | GO:0007369~gastrulation                                                     | 18  | 0,7  | 7,58E-02 | 1,00E+00 | 5,09E-01 |
| GOTERM_BP_FAT | GO:0051235~maintenance of location                                          | 13  | 0,5  | 7,62E-02 | 1,00E+00 | 5,09E-01 |
| GOTERM_BP_FAT | GO:0000819~sister chromatid segregation                                     | 13  | 0,5  | 7,62E-02 | 1,00E+00 | 5,09E-01 |
| GOTERM_BP_FAT | GO:0060538~skeletal muscle organ development                                | 15  | 0,6  | 7,71E-02 | 1,00E+00 | 5,12E-01 |
| GOTERM_BP_FAT | GO:0048609~reproductive process in a multicellular organism                 | 144 | 5,3  | 7,72E-02 | 1,00E+00 | 5,11E-01 |
| GOTERM_BP_FAT | GO:0032504~multicellular organism reproduction                              | 144 | 5,3  | 7,72E-02 | 1,00E+00 | 5,11E-01 |
| GOTERM_BP_FAT | GO:0016311~dephosphorylation                                                | 25  | 0,9  | 8,08E-02 | 1,00E+00 | 5,27E-01 |
| GOTERM_BP_FAT | GO:0016049~cell growth                                                      | 13  | 0,5  | 8,70E-02 | 1,00E+00 | 5,53E-01 |
| GOTERM_BP_FAT | GO:0048285~organelle fission                                                | 33  | 1,2  | 8,89E-02 | 1,00E+00 | 5,60E-01 |
| GOTERM_BP_FAT | GO:0009416~response to light stimulus                                       | 23  | 0,9  | 9,23E-02 | 1,00E+00 | 5,73E-01 |
| GOTERM_BP_FAT | GO:0008105~asymmetric protein localization                                  | 10  | 0,4  | 9,60E-02 | 1,00E+00 | 5,87E-01 |
| GOTERM_BP_FAT | GO:0008586~imaginal disc-derived wing vein morphogenesis                    | 10  | 0,4  | 9,60E-02 | 1,00E+00 | 5,87E-01 |
| GOTERM_BP_FAT | GO:0043085~positive regulation of catalytic activity                        | 16  | 0,6  | 9,63E-02 | 1,00E+00 | 5,87E-01 |
| GOTERM_BP_FAT | GO:0000226~microtubule cytoskeleton organization                            | 59  | 2,2  | 9,69E-02 | 1,00E+00 | 5,88E-01 |
| GOTERM_BP_FAT | GO:0006997~nucleus organization                                             | 11  | 0,4  | 9,78E-02 | 1,00E+00 | 5,90E-01 |
| GOTERM_BP_FAT | GO:0045664~regulation of neuron differentiation                             | 14  | 0,5  | 9,82E-02 | 1,00E+00 | 5,91E-01 |
| GOTERM_CC_FAT | GO:0015630~microtubule cytoskeleton                                         | 75  | 2,8  | 2,78E-10 | 1,28E-07 | 1,28E-07 |
| GOTERM_CC_FAT | GO:0005856~cytoskeleton                                                     | 103 | 3,8  | 1,46E-09 | 6,75E-07 | 3,38E-07 |
| GOTERM_CC_FAT | GO:0005886~plasma membrane                                                  | 191 | 7,1  | 1,54E-09 | 7,12E-07 | 2,37E-07 |
| GOTERM_CC_FAT | GO:0044430~cytoskeletal part                                                | 88  | 3,3  | 2,85E-09 | 1,31E-06 | 3,29E-07 |
| GOTERM_CC_FAT | GO:0005875~microtubule associated complex                                   | 39  | 1,4  | 1,14E-05 | 5,24E-03 | 1,05E-03 |
| GOTERM_CC_FAT | GO:0031224~intrinsic to membrane                                            | 278 | 10,3 | 7,03E-05 | 3,19E-02 | 5,39E-03 |
| GOTERM_CC_FAT | GO:0005911~cell-cell junction                                               | 21  | 0,8  | 4,41E-04 | 1,84E-01 | 2,87E-02 |
| GOTERM_CC_FAT | GO:0016021~integral to membrane                                             | 268 | 9,9  | 4,93E-04 | 2,03E-01 | 2,80E-02 |
| GOTERM_CC_FAT | GO:0005815~microtubule organizing center                                    | 21  | 0,8  | 1,21E-03 | 4,27E-01 | 6,00E-02 |
| GOTERM_CC_FAT | GO:0031012~extracellular matrix                                             | 19  | 0,7  | 1,65E-03 | 5,32E-01 | 7,32E-02 |
| GOTERM_CC_FAT | GO:0043296~apical junction complex                                          | 16  | 0,6  | 1,71E-03 | 5,45E-01 | 6,91E-02 |
| GOTERM_CC_FAT | GO:0016327~apicolateral plasma membrane                                     | 17  | 0,6  | 1,71E-03 | 5,46E-01 | 6,37E-02 |
| GOTERM_CC_FAT | GO:0044459~plasma membrane part                                             | 90  | 3,3  | 2,54E-03 | 6,90E-01 | 8,61E-02 |
| GOTERM_CC_FAT | GO:0005813~centrosome                                                       | 18  | 0,7  | 3,48E-03 | 7,99E-01 | 1,08E-01 |

|               |                                                                     |     |     |          |          |          |
|---------------|---------------------------------------------------------------------|-----|-----|----------|----------|----------|
| GOTERM_CC_FAT | GO:0070161~anchoring junction                                       | 17  | 0,6 | 3,64E-03 | 8,14E-01 | 1,06E-01 |
| GOTERM_CC_FAT | GO:0045177~apical part of cell                                      | 17  | 0,6 | 3,64E-03 | 8,14E-01 | 1,06E-01 |
| GOTERM_CC_FAT | GO:0005578~proteinaceous extracellular matrix                       | 17  | 0,6 | 5,73E-03 | 9,29E-01 | 1,53E-01 |
| GOTERM_CC_FAT | GO:0045179~apical cortex                                            | 10  | 0,4 | 6,19E-03 | 9,43E-01 | 1,55E-01 |
| GOTERM_CC_FAT | GO:0030054~cell junction                                            | 35  | 1,3 | 6,48E-03 | 9,50E-01 | 1,53E-01 |
| GOTERM_CC_FAT | GO:0005912~adherens junction                                        | 16  | 0,6 | 7,57E-03 | 9,70E-01 | 1,68E-01 |
| GOTERM_CC_FAT | GO:0005938~cell cortex                                              | 22  | 0,8 | 9,48E-03 | 9,88E-01 | 1,97E-01 |
| GOTERM_CC_FAT | GO:0005874~microtubule                                              | 26  | 1,0 | 1,30E-02 | 9,98E-01 | 2,50E-01 |
| GOTERM_CC_FAT | GO:0044448~cell cortex part                                         | 15  | 0,6 | 1,51E-02 | 9,99E-01 | 2,73E-01 |
| GOTERM_CC_FAT | GO:0005887~integral to plasma membrane                              | 46  | 1,7 | 1,60E-02 | 9,99E-01 | 2,77E-01 |
| GOTERM_CC_FAT | GO:0030286~dynein complex                                           | 14  | 0,5 | 2,00E-02 | 1,00E+00 | 3,21E-01 |
| GOTERM_CC_FAT | GO:0031226~intrinsic to plasma membrane                             | 46  | 1,7 | 2,07E-02 | 1,00E+00 | 3,20E-01 |
| GOTERM_CC_FAT | GO:0070160~occluding junction                                       | 10  | 0,4 | 2,08E-02 | 1,00E+00 | 3,11E-01 |
| GOTERM_CC_FAT | GO:0005819~spindle                                                  | 19  | 0,7 | 2,75E-02 | 1,00E+00 | 3,78E-01 |
| GOTERM_CC_FAT | GO:0043228~non-membrane-bounded organelle                           | 179 | 6,6 | 2,86E-02 | 1,00E+00 | 3,80E-01 |
| GOTERM_CC_FAT | GO:0043232~intracellular non-membrane-bounded organelle             | 179 | 6,6 | 2,86E-02 | 1,00E+00 | 3,80E-01 |
| GOTERM_CC_FAT | GO:0005694~chromosome                                               | 62  | 2,3 | 6,56E-02 | 1,00E+00 | 6,60E-01 |
| GOTERM_CC_FAT | GO:0044421~extracellular region part                                | 33  | 1,2 | 8,66E-02 | 1,00E+00 | 7,51E-01 |
| GOTERM_MF_FAT | GO:0043565~sequence-specific DNA binding                            | 86  | 3,2 | 1,53E-12 | 1,51E-09 | 1,51E-09 |
| GOTERM_MF_FAT | GO:0003704~specific RNA polymerase II transcription factor activity | 41  | 1,5 | 7,56E-12 | 7,46E-09 | 3,73E-09 |
| GOTERM_MF_FAT | GO:0003700~transcription factor activity                            | 123 | 4,6 | 1,31E-11 | 1,29E-08 | 4,31E-09 |
| GOTERM_MF_FAT | GO:0030528~transcription regulator activity                         | 186 | 6,9 | 1,06E-10 | 1,05E-07 | 2,62E-08 |
| GOTERM_MF_FAT | GO:0003702~RNA polymerase II transcription factor activity          | 88  | 3,3 | 1,88E-10 | 1,83E-07 | 3,66E-08 |
| GOTERM_MF_FAT | GO:0003677~DNA binding                                              | 210 | 7,8 | 7,05E-09 | 6,96E-06 | 1,16E-06 |
| GOTERM_MF_FAT | GO:0016564~transcription repressor activity                         | 45  | 1,7 | 1,94E-08 | 1,92E-05 | 2,74E-06 |
| GOTERM_MF_FAT | GO:0015631~tubulin binding                                          | 28  | 1,0 | 1,54E-05 | 1,51E-02 | 1,89E-03 |
| GOTERM_MF_FAT | GO:0008092~cytoskeletal protein binding                             | 64  | 2,4 | 2,60E-05 | 2,54E-02 | 2,85E-03 |
| GOTERM_MF_FAT | GO:0008017~microtubule binding                                      | 25  | 0,9 | 9,90E-05 | 9,31E-02 | 9,72E-03 |
| GOTERM_MF_FAT | GO:0016563~transcription activator activity                         | 30  | 1,1 | 1,05E-03 | 6,46E-01 | 9,02E-02 |
| GOTERM_MF_FAT | GO:0008235~metalloexopeptidase activity                             | 17  | 0,6 | 1,87E-03 | 8,42E-01 | 1,43E-01 |
| GOTERM_MF_FAT | GO:0016566~specific transcriptional repressor activity              | 15  | 0,6 | 2,19E-03 | 8,85E-01 | 1,53E-01 |
| GOTERM_MF_FAT | GO:0004879~ligand-dependent nuclear receptor activity               | 11  | 0,4 | 3,60E-03 | 9,72E-01 | 2,25E-01 |
| GOTERM_MF_FAT | GO:0004713~protein tyrosine kinase activity                         | 21  | 0,8 | 4,79E-03 | 9,91E-01 | 2,71E-01 |
| GOTERM_MF_FAT | GO:0008134~transcription factor binding                             | 27  | 1,0 | 5,05E-03 | 9,93E-01 | 2,68E-01 |
| GOTERM_MF_FAT | GO:0003714~transcription corepressor activity                       | 10  | 0,4 | 6,39E-03 | 9,98E-01 | 3,11E-01 |
| GOTERM_MF_FAT | GO:0046982~protein heterodimerization activity                      | 16  | 0,6 | 1,29E-02 | 1,00E+00 | 5,10E-01 |
| GOTERM_MF_FAT | GO:0008237~metallopeptidase activity                                | 42  | 1,6 | 1,68E-02 | 1,00E+00 | 5,86E-01 |
| GOTERM_MF_FAT | GO:0015294~solute:cation symporter activity                         | 23  | 0,9 | 1,94E-02 | 1,00E+00 | 6,20E-01 |
| GOTERM_MF_FAT | GO:0005275~amine transmembrane transporter activity                 | 18  | 0,7 | 2,03E-02 | 1,00E+00 | 6,19E-01 |
| GOTERM_MF_FAT | GO:0015296~anion:cation symporter activity                          | 13  | 0,5 | 2,19E-02 | 1,00E+00 | 6,30E-01 |
| GOTERM_MF_FAT | GO:0003712~transcription cofactor activity                          | 19  | 0,7 | 2,24E-02 | 1,00E+00 | 6,21E-01 |
| GOTERM_MF_FAT | GO:0016881~acid-amino acid ligase activity                          | 30  | 1,1 | 2,37E-02 | 1,00E+00 | 6,27E-01 |
| GOTERM_MF_FAT | GO:0004672~protein kinase activity                                  | 64  | 2,4 | 2,75E-02 | 1,00E+00 | 6,67E-01 |
| GOTERM_MF_FAT | GO:0004842~ubiquitin-protein ligase activity                        | 23  | 0,9 | 2,92E-02 | 1,00E+00 | 6,75E-01 |
| GOTERM_MF_FAT | GO:0015293~symporter activity                                       | 23  | 0,9 | 3,31E-02 | 1,00E+00 | 7,08E-01 |
| GOTERM_MF_FAT | GO:0019787~small conjugating protein ligase activity                | 24  | 0,9 | 3,45E-02 | 1,00E+00 | 7,10E-01 |
| GOTERM_MF_FAT | GO:0008270~zinc ion binding                                         | 204 | 7,6 | 3,46E-02 | 1,00E+00 | 6,99E-01 |
| GOTERM_MF_FAT | GO:0015171~amino acid transmembrane transporter activity            | 15  | 0,6 | 3,48E-02 | 1,00E+00 | 6,88E-01 |
| GOTERM_MF_FAT | GO:0003729~mRNA binding                                             | 44  | 1,6 | 3,50E-02 | 1,00E+00 | 6,78E-01 |
| GOTERM_MF_FAT | GO:0004725~protein tyrosine phosphatase activity                    | 14  | 0,5 | 4,41E-02 | 1,00E+00 | 7,51E-01 |
| GOTERM_MF_FAT | GO:0008238~exopeptidase activity                                    | 27  | 1,0 | 4,68E-02 | 1,00E+00 | 7,62E-01 |
| GOTERM_MF_FAT | GO:0004674~protein serine/threonine kinase activity                 | 46  | 1,7 | 5,90E-02 | 1,00E+00 | 8,29E-01 |
| GOTERM_MF_FAT | GO:0004222~metalloendopeptidase activity                            | 21  | 0,8 | 6,30E-02 | 1,00E+00 | 8,40E-01 |
| GOTERM_MF_FAT | GO:0008083~growth factor activity                                   | 10  | 0,4 | 6,99E-02 | 1,00E+00 | 8,63E-01 |

Ada2a - Repression

| Category      | Term                                                                        | Number of affected genes | percentage | PValue   | Bonferroni | Benjamini |
|---------------|-----------------------------------------------------------------------------|--------------------------|------------|----------|------------|-----------|
| GOTERM_BP_FAT | GO:000902~cell morphogenesis                                                | 242                      | 5,5        | 3,58E-35 | 1,05E-31   | 1,05E-31  |
| GOTERM_BP_FAT | GO:0030182~neuron differentiation                                           | 218                      | 4,9        | 2,02E-29 | 5,96E-26   | 2,98E-26  |
| GOTERM_BP_FAT | GO:006928~cell motion                                                       | 176                      | 4,0        | 3,63E-29 | 1,07E-25   | 3,56E-26  |
| GOTERM_BP_FAT | GO:0032989~cellular component morphogenesis                                 | 258                      | 5,8        | 9,51E-29 | 2,80E-25   | 7,00E-26  |
| GOTERM_BP_FAT | GO:0045165~cell fate commitment                                             | 144                      | 3,2        | 2,05E-28 | 6,05E-25   | 1,21E-25  |
| GOTERM_BP_FAT | GO:0009886~post-embryonic morphogenesis                                     | 192                      | 4,3        | 2,40E-27 | 7,08E-24   | 1,18E-24  |
| GOTERM_BP_FAT | GO:0009791~post-embryonic development                                       | 223                      | 5,0        | 3,60E-27 | 1,06E-23   | 1,52E-24  |
| GOTERM_BP_FAT | GO:0007552~metamorphosis                                                    | 195                      | 4,4        | 4,58E-27 | 1,35E-23   | 1,69E-24  |
| GOTERM_BP_FAT | GO:0048707~instar larval or pupal morphogenesis                             | 188                      | 4,2        | 1,68E-26 | 4,96E-23   | 5,51E-24  |
| GOTERM_BP_FAT | GO:0030030~cell projection organization                                     | 194                      | 4,4        | 5,71E-26 | 1,68E-22   | 1,68E-23  |
| GOTERM_BP_FAT | GO:0002165~instar larval or pupal development                               | 214                      | 4,8        | 8,47E-26 | 2,49E-22   | 2,27E-23  |
| GOTERM_BP_FAT | GO:0048666~neuron development                                               | 184                      | 4,1        | 1,76E-24 | 5,18E-21   | 4,31E-22  |
| GOTERM_BP_FAT | GO:0007444~imaginal disc development                                        | 207                      | 4,7        | 1,24E-23 | 3,66E-20   | 2,82E-21  |
| GOTERM_BP_FAT | GO:0000904~cell morphogenesis involved in differentiation                   | 163                      | 3,7        | 1,40E-22 | 4,12E-19   | 2,94E-20  |
| GOTERM_BP_FAT | GO:0048569~post-embryonic organ development                                 | 159                      | 3,6        | 9,36E-22 | 2,76E-18   | 1,84E-19  |
| GOTERM_BP_FAT | GO:0048812~neuron projection morphogenesis                                  | 154                      | 3,5        | 2,06E-21 | 6,06E-18   | 3,79E-19  |
| GOTERM_BP_FAT | GO:0048858~cell projection morphogenesis                                    | 167                      | 3,8        | 2,66E-21 | 7,83E-18   | 4,60E-19  |
| GOTERM_BP_FAT | GO:0031175~neuron projection development                                    | 154                      | 3,5        | 3,24E-21 | 9,54E-18   | 5,30E-19  |
| GOTERM_BP_FAT | GO:0048667~cell morphogenesis involved in neuron differentiation            | 154                      | 3,5        | 5,08E-21 | 1,50E-17   | 7,87E-19  |
| GOTERM_BP_FAT | GO:0048732~gland development                                                | 102                      | 2,3        | 1,25E-20 | 3,68E-17   | 1,84E-18  |
| GOTERM_BP_FAT | GO:0007423~sensory organ development                                        | 199                      | 4,5        | 1,71E-20 | 5,04E-17   | 2,40E-18  |
| GOTERM_BP_FAT | GO:0045449~regulation of transcription                                      | 334                      | 7,5        | 2,46E-20 | 7,24E-17   | 3,29E-18  |
| GOTERM_BP_FAT | GO:0032990~cell part morphogenesis                                          | 169                      | 3,8        | 2,84E-20 | 8,37E-17   | 3,64E-18  |
| GOTERM_BP_FAT | GO:0048563~post-embryonic organ morphogenesis                               | 150                      | 3,4        | 7,99E-20 | 2,35E-16   | 9,80E-18  |
| GOTERM_BP_FAT | GO:0007560~imaginal disc morphogenesis                                      | 150                      | 3,4        | 7,99E-20 | 2,35E-16   | 9,80E-18  |
| GOTERM_BP_FAT | GO:0048729~tissue morphogenesis                                             | 135                      | 3,0        | 1,37E-19 | 4,04E-16   | 1,62E-17  |
| GOTERM_BP_FAT | GO:0007431~salivary gland development                                       | 89                       | 2,0        | 5,16E-19 | 1,52E-15   | 5,84E-17  |
| GOTERM_BP_FAT | GO:0035272~exocrine system development                                      | 89                       | 2,0        | 5,16E-19 | 1,52E-15   | 5,84E-17  |
| GOTERM_BP_FAT | GO:0060429~epithelium development                                           | 129                      | 2,9        | 5,88E-19 | 1,73E-15   | 6,41E-17  |
| GOTERM_BP_FAT | GO:0007409~axonogenesis                                                     | 113                      | 2,5        | 2,19E-18 | 6,46E-15   | 2,31E-16  |
| GOTERM_BP_FAT | GO:0006355~regulation of transcription, DNA-dependent                       | 264                      | 5,9        | 3,72E-18 | 1,10E-14   | 3,78E-16  |
| GOTERM_BP_FAT | GO:0002009~morphogenesis of an epithelium                                   | 123                      | 2,8        | 6,43E-18 | 1,89E-14   | 6,31E-16  |
| GOTERM_BP_FAT | GO:0006350~transcription                                                    | 209                      | 4,7        | 1,64E-17 | 4,84E-14   | 1,56E-15  |
| GOTERM_BP_FAT | GO:0007389~pattern specification process                                    | 216                      | 4,9        | 2,28E-17 | 6,73E-14   | 2,10E-15  |
| GOTERM_BP_FAT | GO:0007411~axon guidance                                                    | 85                       | 1,9        | 2,96E-17 | 8,72E-14   | 2,64E-15  |
| GOTERM_BP_FAT | GO:0051252~regulation of RNA metabolic process                              | 283                      | 6,4        | 4,14E-17 | 1,22E-13   | 3,59E-15  |
| GOTERM_BP_FAT | GO:0003002~regionalization                                                  | 203                      | 4,6        | 9,75E-16 | 2,94E-12   | 8,40E-14  |
| GOTERM_BP_FAT | GO:0007435~salivary gland morphogenesis                                     | 73                       | 1,6        | 1,23E-15 | 3,60E-12   | 9,99E-14  |
| GOTERM_BP_FAT | GO:0022612~gland morphogenesis                                              | 73                       | 1,6        | 1,23E-15 | 3,60E-12   | 9,99E-14  |
| GOTERM_BP_FAT | GO:0051674~localization of cell                                             | 106                      | 2,4        | 5,68E-15 | 1,67E-11   | 4,51E-13  |
| GOTERM_BP_FAT | GO:0001709~cell fate determination                                          | 78                       | 1,8        | 1,18E-14 | 3,50E-11   | 9,21E-13  |
| GOTERM_BP_FAT | GO:0048870~cell motility                                                    | 101                      | 2,3        | 2,98E-14 | 8,76E-11   | 2,25E-12  |
| GOTERM_BP_FAT | GO:0048736~appendage development                                            | 123                      | 2,8        | 6,50E-14 | 1,92E-10   | 4,79E-12  |
| GOTERM_BP_FAT | GO:0007163~establishment or maintenance of cell polarity                    | 68                       | 1,5        | 8,66E-14 | 2,55E-10   | 6,22E-12  |
| GOTERM_BP_FAT | GO:0035107~appendage morphogenesis                                          | 121                      | 2,7        | 1,07E-13 | 3,14E-10   | 7,47E-12  |
| GOTERM_BP_FAT | GO:0007447~imaginal disc pattern formation                                  | 62                       | 1,4        | 1,32E-13 | 3,88E-10   | 9,03E-12  |
| GOTERM_BP_FAT | GO:0048749~compound eye development                                         | 145                      | 3,3        | 1,50E-13 | 4,42E-10   | 1,00E-11  |
| GOTERM_BP_FAT | GO:0048737~imaginal disc-derived appendage development                      | 121                      | 2,7        | 1,55E-13 | 4,56E-10   | 1,01E-11  |
| GOTERM_BP_FAT | GO:0035114~imaginal disc-derived appendage morphogenesis                    | 119                      | 2,7        | 2,53E-13 | 7,46E-10   | 1,62E-11  |
| GOTERM_BP_FAT | GO:0001654~eye development                                                  | 153                      | 3,4        | 2,64E-13 | 7,77E-10   | 1,65E-11  |
| GOTERM_BP_FAT | GO:0030163~protein catabolic process                                        | 104                      | 2,3        | 2,99E-13 | 8,80E-10   | 1,83E-11  |
| GOTERM_BP_FAT | GO:0016477~cell migration                                                   | 94                       | 2,1        | 3,96E-13 | 1,17E-09   | 2,38E-11  |
| GOTERM_BP_FAT | GO:0060541~respiratory system development                                   | 85                       | 1,9        | 5,25E-13 | 1,55E-09   | 3,10E-11  |
| GOTERM_BP_FAT | GO:0007424~open tracheal system development                                 | 85                       | 1,9        | 5,25E-13 | 1,55E-09   | 3,10E-11  |
| GOTERM_BP_FAT | GO:0035220~wing disc development                                            | 133                      | 3,0        | 1,06E-12 | 3,12E-09   | 6,11E-11  |
| GOTERM_BP_FAT | GO:0006357~regulation of transcription from RNA polymerase II promoter      | 99                       | 2,2        | 2,30E-12 | 6,76E-09   | 1,30E-10  |
| GOTERM_BP_FAT | GO:0007155~cell adhesion                                                    | 92                       | 2,1        | 2,39E-12 | 7,04E-09   | 1,33E-10  |
| GOTERM_BP_FAT | GO:0022610~biological adhesion                                              | 96                       | 2,2        | 1,06E-11 | 3,12E-08   | 5,78E-10  |
| GOTERM_BP_FAT | GO:0035120~post-embryonic appendage morphogenesis                           | 111                      | 2,5        | 1,54E-11 | 4,55E-08   | 8,27E-10  |
| GOTERM_BP_FAT | GO:0051603~proteolysis involved in cellular protein catabolic process       | 93                       | 2,1        | 3,26E-11 | 9,60E-08   | 1,71E-09  |
| GOTERM_BP_FAT | GO:0044257~cellular protein catabolic process                               | 93                       | 2,1        | 3,26E-11 | 9,60E-08   | 1,71E-09  |
| GOTERM_BP_FAT | GO:0048598~embryonic morphogenesis                                          | 109                      | 2,5        | 3,54E-11 | 1,04E-07   | 1,83E-09  |
| GOTERM_BP_FAT | GO:0045596~negative regulation of cell differentiation                      | 49                       | 1,1        | 3,75E-11 | 1,10E-07   | 1,90E-09  |
| GOTERM_BP_FAT | GO:0001751~compound eye photoreceptor cell differentiation                  | 64                       | 1,4        | 6,61E-11 | 1,95E-07   | 3,30E-09  |
| GOTERM_BP_FAT | GO:0007166~cell surface receptor linked signal transduction                 | 245                      | 5,5        | 7,89E-11 | 2,32E-07   | 3,87E-09  |
| GOTERM_BP_FAT | GO:0035218~leg disc development                                             | 37                       | 0,8        | 1,69E-10 | 4,96E-07   | 8,14E-09  |
| GOTERM_BP_FAT | GO:0043632~modification-dependent macromolecule catabolic process           | 86                       | 1,9        | 2,64E-10 | 7,77E-07   | 1,25E-08  |
| GOTERM_BP_FAT | GO:0012501~programmed cell death                                            | 79                       | 1,8        | 4,47E-10 | 1,32E-06   | 2,09E-08  |
| GOTERM_BP_FAT | GO:0006468~protein amino acid phosphorylation                               | 118                      | 2,7        | 4,58E-10 | 1,35E-06   | 2,11E-08  |
| GOTERM_BP_FAT | GO:0019941~modification-dependent protein catabolic process                 | 85                       | 1,9        | 4,92E-10 | 1,45E-06   | 2,23E-08  |
| GOTERM_BP_FAT | GO:0001738~morphogenesis of a polarized epithelium                          | 45                       | 1,0        | 5,82E-10 | 1,71E-06   | 2,60E-08  |
| GOTERM_BP_FAT | GO:0046530~photoreceptor cell differentiation                               | 69                       | 1,6        | 6,05E-10 | 1,78E-06   | 2,66E-08  |
| GOTERM_BP_FAT | GO:0016337~cell-cell adhesion                                               | 40                       | 0,9        | 6,34E-10 | 1,87E-06   | 2,75E-08  |
| GOTERM_BP_FAT | GO:0001754~eye photoreceptor cell differentiation                           | 64                       | 1,4        | 7,93E-10 | 2,34E-06   | 3,39E-08  |
| GOTERM_BP_FAT | GO:0009057~macromolecule catabolic process                                  | 123                      | 2,8        | 1,35E-09 | 3,99E-06   | 5,70E-08  |
| GOTERM_BP_FAT | GO:0007219~Notch signaling pathway                                          | 39                       | 0,9        | 1,55E-09 | 4,56E-06   | 6,43E-08  |
| GOTERM_BP_FAT | GO:0048663~neuron fate commitment                                           | 37                       | 0,8        | 2,05E-09 | 6,03E-06   | 8,37E-08  |
| GOTERM_BP_FAT | GO:0006793~phosphorus metabolic process                                     | 214                      | 4,8        | 2,42E-09 | 7,13E-06   | 9,76E-08  |
| GOTERM_BP_FAT | GO:0006796~phosphate metabolic process                                      | 214                      | 4,8        | 2,42E-09 | 7,13E-06   | 9,76E-08  |
| GOTERM_BP_FAT | GO:0007472~wing disc morphogenesis                                          | 102                      | 2,3        | 2,51E-09 | 7,39E-06   | 9,99E-08  |
| GOTERM_BP_FAT | GO:0016265~death                                                            | 81                       | 1,8        | 2,73E-09 | 8,03E-06   | 1,07E-07  |
| GOTERM_BP_FAT | GO:0035222~wing disc pattern formation                                      | 43                       | 1,0        | 3,12E-09 | 9,20E-06   | 1,21E-07  |
| GOTERM_BP_FAT | GO:0007476~imaginal disc-derived wing morphogenesis                         | 101                      | 2,3        | 3,18E-09 | 9,37E-06   | 1,22E-07  |
| GOTERM_BP_FAT | GO:0007169~transmembrane receptor protein tyrosine kinase signaling pathway | 60                       | 1,4        | 3,25E-09 | 9,57E-06   | 1,23E-07  |
| GOTERM_BP_FAT | GO:0051301~cell division                                                    | 96                       | 2,2        | 4,15E-09 | 1,22E-05   | 1,55E-07  |
| GOTERM_BP_FAT | GO:0008219~cell death                                                       | 80                       | 1,8        | 4,98E-09 | 1,47E-05   | 1,83E-07  |
| GOTERM_BP_FAT | GO:0035214~eye-antennal disc development                                    | 40                       | 0,9        | 5,40E-09 | 1,59E-05   | 1,97E-07  |
| GOTERM_BP_FAT | GO:0046552~photoreceptor cell fate commitment                               | 35                       | 0,8        | 5,78E-09 | 1,70E-05   | 2,07E-07  |
| GOTERM_BP_FAT | GO:0007346~regulation of mitotic cell cycle                                 | 55                       | 1,2        | 6,51E-09 | 1,92E-05   | 2,31E-07  |
| GOTERM_BP_FAT | GO:0042706~eye photoreceptor cell fate commitment                           | 33                       | 0,7        | 7,37E-09 | 2,17E-05   | 2,59E-07  |
| GOTERM_BP_FAT | GO:0001752~compound eye photoreceptor fate commitment                       | 33                       | 0,7        | 7,37E-09 | 2,17E-05   | 2,59E-07  |

|               |                                                                                                         |     |     |          |          |          |
|---------------|---------------------------------------------------------------------------------------------------------|-----|-----|----------|----------|----------|
| GOTERM_BP_FAT | GO:0008356~asymmetric cell division                                                                     | 38  | 0,9 | 7,63E-09 | 2,25E-05 | 2,64E-07 |
| GOTERM_BP_FAT | GO:0007167~enzyme linked receptor protein signaling pathway                                             | 73  | 1,6 | 9,08E-09 | 2,67E-05 | 3,11E-07 |
| GOTERM_BP_FAT | GO:0001745~compound eye morphogenesis                                                                   | 111 | 2,5 | 9,55E-09 | 2,81E-05 | 3,23E-07 |
| GOTERM_BP_FAT | GO:00016271~tissue death                                                                                | 43  | 1,0 | 1,08E-08 | 3,18E-05 | 3,62E-07 |
| GOTERM_BP_FAT | GO:0007559~histolysis                                                                                   | 43  | 1,0 | 1,08E-08 | 3,18E-05 | 3,62E-07 |
| GOTERM_BP_FAT | GO:0001736~establishment of planar polarity                                                             | 39  | 0,9 | 1,26E-08 | 3,70E-05 | 4,16E-07 |
| GOTERM_BP_FAT | GO:0016331~morphogenesis of embryonic epithelium                                                        | 63  | 1,4 | 1,43E-08 | 4,21E-05 | 4,68E-07 |
| GOTERM_BP_FAT | GO:0048592~eye morphogenesis                                                                            | 117 | 2,6 | 1,53E-08 | 4,50E-05 | 4,95E-07 |
| GOTERM_BP_FAT | GO:0003006~reproductive developmental process                                                           | 196 | 4,4 | 1,61E-08 | 4,75E-05 | 5,16E-07 |
| GOTERM_BP_FAT | GO:0060284~regulation of cell development                                                               | 67  | 1,5 | 1,81E-08 | 5,34E-05 | 5,74E-07 |
| GOTERM_BP_FAT | GO:0051726~regulation of cell cycle                                                                     | 80  | 1,8 | 1,99E-08 | 5,87E-05 | 6,24E-07 |
| GOTERM_BP_FAT | GO:0048859~formation of anatomical boundary                                                             | 31  | 0,7 | 2,08E-08 | 6,14E-05 | 6,46E-07 |
| GOTERM_BP_FAT | GO:0001708~cell fate specification                                                                      | 39  | 0,9 | 2,39E-08 | 7,05E-05 | 7,34E-07 |
| GOTERM_BP_FAT | GO:0007164~establishment of tissue polarity                                                             | 39  | 0,9 | 2,39E-08 | 7,05E-05 | 7,34E-07 |
| GOTERM_BP_FAT | GO:0044265~cellular macromolecule catabolic process                                                     | 101 | 2,3 | 2,44E-08 | 7,17E-05 | 7,40E-07 |
| GOTERM_BP_FAT | GO:0010942~positive regulation of cell death                                                            | 31  | 0,7 | 4,61E-08 | 1,36E-04 | 1,39E-06 |
| GOTERM_BP_FAT | GO:0043068~positive regulation of programmed cell death                                                 | 31  | 0,7 | 4,61E-08 | 1,36E-04 | 1,39E-06 |
| GOTERM_BP_FAT | GO:0007365~periodic partitioning                                                                        | 35  | 0,8 | 5,03E-08 | 1,48E-04 | 1,50E-06 |
| GOTERM_BP_FAT | GO:0035070~salivary gland histolysis                                                                    | 41  | 0,9 | 5,28E-08 | 1,56E-04 | 1,56E-06 |
| GOTERM_BP_FAT | GO:0048102~autophagic cell death                                                                        | 41  | 0,9 | 5,28E-08 | 1,56E-04 | 1,56E-06 |
| GOTERM_BP_FAT | GO:0035071~salivary gland cell autophagic cell death                                                    | 41  | 0,9 | 5,28E-08 | 1,56E-04 | 1,56E-06 |
| GOTERM_BP_FAT | GO:0007391~dorsal closure                                                                               | 52  | 1,2 | 5,42E-08 | 1,60E-04 | 1,58E-06 |
| GOTERM_BP_FAT | GO:0016055~Wnt receptor signaling pathway                                                               | 42  | 0,9 | 7,44E-08 | 2,19E-04 | 2,15E-06 |
| GOTERM_BP_FAT | GO:0042067~establishment of ommatidial polarity                                                         | 31  | 0,7 | 9,78E-08 | 2,88E-04 | 2,80E-06 |
| GOTERM_BP_FAT | GO:0048645~organ formation                                                                              | 28  | 0,6 | 1,48E-07 | 4,37E-04 | 4,20E-06 |
| GOTERM_BP_FAT | GO:0007398~ectoderm development                                                                         | 40  | 0,9 | 1,99E-07 | 5,85E-04 | 5,58E-06 |
| GOTERM_BP_FAT | GO:0008283~cell proliferation                                                                           | 63  | 1,4 | 2,13E-07 | 6,28E-04 | 5,92E-06 |
| GOTERM_BP_FAT | GO:0007156~homophilic cell adhesion                                                                     | 22  | 0,5 | 2,24E-07 | 6,60E-04 | 6,17E-06 |
| GOTERM_BP_FAT | GO:0009880~embryonic pattern specification                                                              | 100 | 2,3 | 2,52E-07 | 7,42E-04 | 6,88E-06 |
| GOTERM_BP_FAT | GO:0046668~regulation of retinal cell programmed cell death                                             | 16  | 0,4 | 2,81E-07 | 8,28E-04 | 7,60E-06 |
| GOTERM_BP_FAT | GO:0007350~blastoderm segmentation                                                                      | 95  | 2,1 | 3,62E-07 | 1,07E-03 | 9,70E-06 |
| GOTERM_BP_FAT | GO:0007455~eye-antennal disc morphogenesis                                                              | 27  | 0,6 | 3,70E-07 | 1,09E-03 | 9,81E-06 |
| GOTERM_BP_FAT | GO:0007548~sex differentiation                                                                          | 36  | 0,8 | 4,79E-07 | 1,41E-03 | 1,26E-05 |
| GOTERM_BP_FAT | GO:0007449~proximal/distal pattern formation, imaginal disc                                             | 18  | 0,4 | 5,08E-07 | 1,49E-03 | 1,32E-05 |
| GOTERM_BP_FAT | GO:0043067~regulation of programmed cell death                                                          | 56  | 1,3 | 5,59E-07 | 1,64E-03 | 1,44E-05 |
| GOTERM_BP_FAT | GO:0009954~proximal/distal pattern formation                                                            | 19  | 0,4 | 5,77E-07 | 1,70E-03 | 1,48E-05 |
| GOTERM_BP_FAT | GO:0051276~chromosome organization                                                                      | 116 | 2,6 | 6,38E-07 | 1,88E-03 | 1,62E-05 |
| GOTERM_BP_FAT | GO:0007422~peripheral nervous system development                                                        | 47  | 1,1 | 6,75E-07 | 1,99E-03 | 1,70E-05 |
| GOTERM_BP_FAT | GO:0048813~dendrite morphogenesis                                                                       | 58  | 1,3 | 7,14E-07 | 2,10E-03 | 1,78E-05 |
| GOTERM_BP_FAT | GO:0016358~dendrite development                                                                         | 58  | 1,3 | 7,14E-07 | 2,10E-03 | 1,78E-05 |
| GOTERM_BP_FAT | GO:0008038~neuron recognition                                                                           | 31  | 0,7 | 7,48E-07 | 2,20E-03 | 1,85E-05 |
| GOTERM_BP_FAT | GO:0060173~limb development                                                                             | 27  | 0,6 | 7,81E-07 | 2,30E-03 | 1,92E-05 |
| GOTERM_BP_FAT | GO:0035108~limb morphogenesis                                                                           | 27  | 0,6 | 7,81E-07 | 2,30E-03 | 1,92E-05 |
| GOTERM_BP_FAT | GO:0000122~negative regulation of transcription from RNA polymerase II promoter                         | 36  | 0,8 | 8,28E-07 | 2,43E-03 | 2,01E-05 |
| GOTERM_BP_FAT | GO:0030707~ovarian follicle cell development                                                            | 89  | 2,0 | 8,36E-07 | 2,46E-03 | 2,02E-05 |
| GOTERM_BP_FAT | GO:0010160~formation of organ boundary                                                                  | 26  | 0,6 | 9,10E-07 | 2,68E-03 | 2,18E-05 |
| GOTERM_BP_FAT | GO:0035282~segmentation                                                                                 | 108 | 2,4 | 9,35E-07 | 2,75E-03 | 2,22E-05 |
| GOTERM_BP_FAT | GO:0009968~negative regulation of signal transduction                                                   | 52  | 1,2 | 1,01E-06 | 2,97E-03 | 2,38E-05 |
| GOTERM_BP_FAT | GO:0010564~regulation of cell cycle process                                                             | 45  | 1,0 | 1,09E-06 | 3,21E-03 | 2,55E-05 |
| GOTERM_BP_FAT | GO:0007450~dorsal/ventral pattern formation, imaginal disc                                              | 34  | 0,8 | 1,29E-06 | 3,79E-03 | 2,99E-05 |
| GOTERM_BP_FAT | GO:0008037~cell recognition                                                                             | 31  | 0,7 | 1,38E-06 | 4,06E-03 | 3,18E-05 |
| GOTERM_BP_FAT | GO:0022604~regulation of cell morphogenesis                                                             | 58  | 1,3 | 1,43E-06 | 4,22E-03 | 3,27E-05 |
| GOTERM_BP_FAT | GO:0050767~regulation of neurogenesis                                                                   | 38  | 0,9 | 1,46E-06 | 4,30E-03 | 3,31E-05 |
| GOTERM_BP_FAT | GO:0010648~negative regulation of cell communication                                                    | 52  | 1,2 | 1,47E-06 | 4,33E-03 | 3,31E-05 |
| GOTERM_BP_FAT | GO:0051254~positive regulation of RNA metabolic process                                                 | 47  | 1,1 | 1,55E-06 | 4,55E-03 | 3,46E-05 |
| GOTERM_BP_FAT | GO:0051960~regulation of nervous system development                                                     | 47  | 1,1 | 1,55E-06 | 4,55E-03 | 3,46E-05 |
| GOTERM_BP_FAT | GO:0035215~genital disc development                                                                     | 21  | 0,5 | 1,61E-06 | 4,72E-03 | 3,55E-05 |
| GOTERM_BP_FAT | GO:0014016~neuroblast differentiation                                                                   | 21  | 0,5 | 1,61E-06 | 4,72E-03 | 3,55E-05 |
| GOTERM_BP_FAT | GO:0008045~motor axon guidance                                                                          | 18  | 0,4 | 1,66E-06 | 4,88E-03 | 3,65E-05 |
| GOTERM_BP_FAT | GO:0008544~epidermis development                                                                        | 30  | 0,7 | 1,69E-06 | 4,97E-03 | 3,69E-05 |
| GOTERM_BP_FAT | GO:0048589~developmental growth                                                                         | 43  | 1,0 | 1,77E-06 | 5,19E-03 | 3,83E-05 |
| GOTERM_BP_FAT | GO:0007367~segment polarity determination                                                               | 26  | 0,6 | 1,88E-06 | 5,51E-03 | 4,03E-05 |
| GOTERM_BP_FAT | GO:0035110~leg morphogenesis                                                                            | 26  | 0,6 | 1,88E-06 | 5,51E-03 | 4,03E-05 |
| GOTERM_BP_FAT | GO:0045893~positive regulation of transcription, DNA-dependent                                          | 46  | 1,0 | 1,97E-06 | 5,80E-03 | 4,21E-05 |
| GOTERM_BP_FAT | GO:0007242~intracellular signaling cascade                                                              | 119 | 2,7 | 2,19E-06 | 6,44E-03 | 4,65E-05 |
| GOTERM_BP_FAT | GO:0010941~regulation of cell death                                                                     | 56  | 1,3 | 2,32E-06 | 6,81E-03 | 4,88E-05 |
| GOTERM_BP_FAT | GO:0048565~gut development                                                                              | 40  | 0,9 | 2,33E-06 | 6,84E-03 | 4,87E-05 |
| GOTERM_BP_FAT | GO:0001700~embryonic development via the syncytial blastoderm                                           | 91  | 2,1 | 2,34E-06 | 6,87E-03 | 4,85E-05 |
| GOTERM_BP_FAT | GO:0035295~tube development                                                                             | 50  | 1,1 | 2,39E-06 | 7,02E-03 | 4,93E-05 |
| GOTERM_BP_FAT | GO:0009967~positive regulation of signal transduction                                                   | 31  | 0,7 | 2,48E-06 | 7,26E-03 | 5,06E-05 |
| GOTERM_BP_FAT | GO:0007088~regulation of mitosis                                                                        | 27  | 0,6 | 3,06E-06 | 8,98E-03 | 6,22E-05 |
| GOTERM_BP_FAT | GO:0051783~regulation of nuclear division                                                               | 27  | 0,6 | 3,06E-06 | 8,98E-03 | 6,22E-05 |
| GOTERM_BP_FAT | GO:0007478~leg disc morphogenesis                                                                       | 22  | 0,5 | 3,41E-06 | 1,00E-02 | 6,88E-05 |
| GOTERM_BP_FAT | GO:0007507~heart development                                                                            | 38  | 0,9 | 3,76E-06 | 1,10E-02 | 7,53E-05 |
| GOTERM_BP_FAT | GO:0014017~neuroblast fate commitment                                                                   | 20  | 0,5 | 4,23E-06 | 1,24E-02 | 8,41E-05 |
| GOTERM_BP_FAT | GO:0010628~positive regulation of gene expression                                                       | 56  | 1,3 | 4,51E-06 | 1,32E-02 | 8,92E-05 |
| GOTERM_BP_FAT | GO:0016310~phosphorylation                                                                              | 159 | 3,6 | 4,95E-06 | 1,45E-02 | 9,72E-05 |
| GOTERM_BP_FAT | GO:0048190~wing disc dorsal/ventral pattern formation                                                   | 30  | 0,7 | 5,39E-06 | 1,58E-02 | 1,05E-04 |
| GOTERM_BP_FAT | GO:0051173~positive regulation of nitrogen compound metabolic process                                   | 57  | 1,3 | 6,71E-06 | 1,96E-02 | 1,30E-04 |
| GOTERM_BP_FAT | GO:0045935~positive regulation of nucleobase, nucleoside, nucleotide and nucleic acid metabolic process | 57  | 1,3 | 6,71E-06 | 1,96E-02 | 1,30E-04 |
| GOTERM_BP_FAT | GO:0042063~gliogenesis                                                                                  | 29  | 0,7 | 6,72E-06 | 1,96E-02 | 1,29E-04 |
| GOTERM_BP_FAT | GO:0010647~positive regulation of cell communication                                                    | 31  | 0,7 | 7,35E-06 | 2,14E-02 | 1,41E-04 |
| GOTERM_BP_FAT | GO:0045941~positive regulation of transcription                                                         | 55  | 1,2 | 7,89E-06 | 2,30E-02 | 1,50E-04 |
| GOTERM_BP_FAT | GO:0045466~R7 cell differentiation                                                                      | 21  | 0,5 | 8,53E-06 | 2,48E-02 | 1,61E-04 |
| GOTERM_BP_FAT | GO:0035109~imaginal disc-derived limb morphogenesis                                                     | 21  | 0,5 | 8,53E-06 | 2,48E-02 | 1,61E-04 |
| GOTERM_BP_FAT | GO:0010604~positive regulation of macromolecule metabolic process                                       | 64  | 1,4 | 1,02E-05 | 2,95E-02 | 1,91E-04 |
| GOTERM_BP_FAT | GO:0009792~embryonic development ending in birth or egg hatching                                        | 92  | 2,1 | 1,13E-05 | 3,28E-02 | 2,11E-04 |
| GOTERM_BP_FAT | GO:0008360~regulation of cell shape                                                                     | 48  | 1,1 | 1,13E-05 | 3,28E-02 | 2,10E-04 |
| GOTERM_BP_FAT | GO:0006470~protein amino acid dephosphorylation                                                         | 42  | 0,9 | 1,15E-05 | 3,32E-02 | 2,11E-04 |
| GOTERM_BP_FAT | GO:0035223~leg disc pattern formation                                                                   | 14  | 0,3 | 1,16E-05 | 3,36E-02 | 2,12E-04 |
| GOTERM_BP_FAT | GO:0010454~negative regulation of cell fate commitment                                                  | 14  | 0,3 | 1,16E-05 | 3,36E-02 | 2,12E-04 |
| GOTERM_BP_FAT | GO:0009996~negative regulation of cell fate specification                                               | 14  | 0,3 | 1,16E-05 | 3,36E-02 | 2,12E-04 |
| GOTERM_BP_FAT | GO:0007479~leg disc proximal/distal pattern formation                                                   | 14  | 0,3 | 1,16E-05 | 3,36E-02 | 2,12E-04 |
| GOTERM_BP_FAT | GO:0010453~regulation of cell fate commitment                                                           | 16  | 0,4 | 1,32E-05 | 3,82E-02 | 2,41E-04 |
| GOTERM_BP_FAT | GO:0042659~regulation of cell fate specification                                                        | 16  | 0,4 | 1,32E-05 | 3,82E-02 | 2,41E-04 |

|               |                                                                                 |     |     |          |          |          |
|---------------|---------------------------------------------------------------------------------|-----|-----|----------|----------|----------|
| GOTERM_BP_FAT | GO:0007018~microtubule-based movement                                           | 50  | 1,1 | 1,37E-05 | 3,95E-02 | 2,47E-04 |
| GOTERM_BP_FAT | GO:0006511~ubiquitin-dependent protein catabolic process                        | 47  | 1,1 | 1,44E-05 | 4,16E-02 | 2,59E-04 |
| GOTERM_BP_FAT | GO:0007498~mesoderm development                                                 | 45  | 1,0 | 1,66E-05 | 4,76E-02 | 2,95E-04 |
| GOTERM_BP_FAT | GO:0048610~reproductive cellular process                                        | 180 | 4,1 | 1,67E-05 | 4,80E-02 | 2,96E-04 |
| GOTERM_BP_FAT | GO:0007419~ventral cord development                                             | 21  | 0,5 | 1,78E-05 | 5,12E-02 | 3,15E-04 |
| GOTERM_BP_FAT | GO:0031328~positive regulation of cellular biosynthetic process                 | 67  | 1,5 | 1,94E-05 | 5,55E-02 | 3,40E-04 |
| GOTERM_BP_FAT | GO:0009891~positive regulation of biosynthetic process                          | 67  | 1,5 | 1,94E-05 | 5,55E-02 | 3,40E-04 |
| GOTERM_BP_FAT | GO:0045944~positive regulation of transcription from RNA polymerase II promoter | 29  | 0,7 | 1,95E-05 | 5,57E-02 | 3,39E-04 |
| GOTERM_BP_FAT | GO:0007480~imaginal disc-derived leg morphogenesis                              | 20  | 0,5 | 2,10E-05 | 6,00E-02 | 3,64E-04 |
| GOTERM_BP_FAT | GO:0035127~post-embryonic limb morphogenesis                                    | 20  | 0,5 | 2,10E-05 | 6,00E-02 | 3,64E-04 |
| GOTERM_BP_FAT | GO:0035239~tube morphogenesis                                                   | 42  | 0,9 | 2,40E-05 | 6,83E-02 | 4,14E-04 |
| GOTERM_BP_FAT | GO:0043297~apical junction assembly                                             | 19  | 0,4 | 2,45E-05 | 6,95E-02 | 4,19E-04 |
| GOTERM_BP_FAT | GO:0007400~neuroblast fate determination                                        | 18  | 0,4 | 2,80E-05 | 7,92E-02 | 4,77E-04 |
| GOTERM_BP_FAT | GO:0048864~stem cell development                                                | 22  | 0,5 | 2,91E-05 | 8,22E-02 | 4,93E-04 |
| GOTERM_BP_FAT | GO:0012502~induction of programmed cell death                                   | 22  | 0,5 | 2,91E-05 | 8,22E-02 | 4,93E-04 |
| GOTERM_BP_FAT | GO:0007405~neuroblast proliferation                                             | 22  | 0,5 | 2,91E-05 | 8,22E-02 | 4,93E-04 |
| GOTERM_BP_FAT | GO:0048863~stem cell differentiation                                            | 22  | 0,5 | 2,91E-05 | 8,22E-02 | 4,93E-04 |
| GOTERM_BP_FAT | GO:0046669~regulation of compound eye retinal cell programmed cell death        | 12  | 0,3 | 2,91E-05 | 8,22E-02 | 4,90E-04 |
| GOTERM_BP_FAT | GO:0010557~positive regulation of macromolecule biosynthetic process            | 58  | 1,3 | 3,06E-05 | 8,63E-02 | 5,13E-04 |
| GOTERM_BP_FAT | GO:0017145~stem cell division                                                   | 29  | 0,7 | 3,19E-05 | 8,97E-02 | 5,31E-04 |
| GOTERM_BP_FAT | GO:0007017~microtubule-based process                                            | 149 | 3,4 | 3,26E-05 | 9,15E-02 | 5,39E-04 |
| GOTERM_BP_FAT | GO:0045664~regulation of neuron differentiation                                 | 30  | 0,7 | 4,02E-05 | 1,12E-01 | 6,62E-04 |
| GOTERM_BP_FAT | GO:0034329~cell junction assembly                                               | 20  | 0,5 | 4,26E-05 | 1,18E-01 | 6,96E-04 |
| GOTERM_BP_FAT | GO:0008407~bristle morphogenesis                                                | 27  | 0,6 | 5,12E-05 | 1,40E-01 | 8,33E-04 |
| GOTERM_BP_FAT | GO:0043065~positive regulation of apoptosis                                     | 22  | 0,5 | 5,40E-05 | 1,47E-01 | 8,74E-04 |
| GOTERM_BP_FAT | GO:0007059~chromosome segregation                                               | 53  | 1,2 | 5,58E-05 | 1,51E-01 | 8,97E-04 |
| GOTERM_BP_FAT | GO:0022416~bristle development                                                  | 30  | 0,7 | 6,29E-05 | 1,69E-01 | 1,01E-03 |
| GOTERM_BP_FAT | GO:0019827~stem cell maintenance                                                | 21  | 0,5 | 6,66E-05 | 1,78E-01 | 1,06E-03 |
| GOTERM_BP_FAT | GO:0007096~regulation of exit from mitosis                                      | 10  | 0,2 | 6,68E-05 | 1,79E-01 | 1,06E-03 |
| GOTERM_BP_FAT | GO:0006325~chromatin organization                                               | 71  | 1,6 | 6,89E-05 | 1,84E-01 | 1,08E-03 |
| GOTERM_BP_FAT | GO:0009953~dorsal/ventral pattern formation                                     | 59  | 1,3 | 6,99E-05 | 1,86E-01 | 1,09E-03 |
| GOTERM_BP_FAT | GO:0007298~border follicle cell migration                                       | 34  | 0,8 | 8,06E-05 | 2,11E-01 | 1,26E-03 |
| GOTERM_BP_FAT | GO:0055123~digestive system development                                         | 27  | 0,6 | 8,27E-05 | 2,16E-01 | 1,28E-03 |
| GOTERM_BP_FAT | GO:0048546~digestive tract morphogenesis                                        | 27  | 0,6 | 8,27E-05 | 2,16E-01 | 1,28E-03 |
| GOTERM_BP_FAT | GO:0009913~epidermal cell differentiation                                       | 22  | 0,5 | 9,62E-05 | 2,47E-01 | 1,48E-03 |
| GOTERM_BP_FAT | GO:0045137~development of primary sexual characteristics                        | 22  | 0,5 | 9,62E-05 | 2,47E-01 | 1,48E-03 |
| GOTERM_BP_FAT | GO:0007427~epithelial cell migration, open tracheal system                      | 19  | 0,4 | 9,98E-05 | 2,55E-01 | 1,53E-03 |
| GOTERM_BP_FAT | GO:0048103~somatic stem cell division                                           | 19  | 0,4 | 9,98E-05 | 2,55E-01 | 1,53E-03 |
| GOTERM_BP_FAT | GO:0007043~cell-cell junction assembly                                          | 19  | 0,4 | 9,98E-05 | 2,55E-01 | 1,53E-03 |
| GOTERM_BP_FAT | GO:0010631~epithelial cell migration                                            | 19  | 0,4 | 9,98E-05 | 2,55E-01 | 1,53E-03 |
| GOTERM_BP_FAT | GO:0007276~gamete generation                                                    | 241 | 5,4 | 1,05E-04 | 2,65E-01 | 1,60E-03 |
| GOTERM_BP_FAT | GO:0007439~ectodermal gut development                                           | 26  | 0,6 | 1,05E-04 | 2,66E-01 | 1,59E-03 |
| GOTERM_BP_FAT | GO:0048567~ectodermal gut morphogenesis                                         | 26  | 0,6 | 1,05E-04 | 2,66E-01 | 1,59E-03 |
| GOTERM_BP_FAT | GO:0042981~regulation of apoptosis                                              | 45  | 1,0 | 1,14E-04 | 2,86E-01 | 1,73E-03 |
| GOTERM_BP_FAT | GO:0007517~muscle organ development                                             | 60  | 1,4 | 1,17E-04 | 2,92E-01 | 1,76E-03 |
| GOTERM_BP_FAT | GO:0035316~non-sensory hair organization                                        | 21  | 0,5 | 1,20E-04 | 2,98E-01 | 1,79E-03 |
| GOTERM_BP_FAT | GO:0035315~hair cell differentiation                                            | 21  | 0,5 | 1,20E-04 | 2,98E-01 | 1,79E-03 |
| GOTERM_BP_FAT | GO:0007297~ovarian follicle cell migration                                      | 38  | 0,9 | 1,27E-04 | 3,12E-01 | 1,89E-03 |
| GOTERM_BP_FAT | GO:0006508~proteolysis                                                          | 245 | 5,5 | 1,37E-04 | 3,31E-01 | 2,02E-03 |
| GOTERM_BP_FAT | GO:0016311~dephosphorylation                                                    | 49  | 1,1 | 1,40E-04 | 3,38E-01 | 2,06E-03 |
| GOTERM_BP_FAT | GO:0033043~regulation of organelle organization                                 | 49  | 1,1 | 1,40E-04 | 3,38E-01 | 2,06E-03 |
| GOTERM_BP_FAT | GO:0048534~hemopoietic or lymphoid organ development                            | 30  | 0,7 | 1,45E-04 | 3,48E-01 | 2,13E-03 |
| GOTERM_BP_FAT | GO:0002520~immune system development                                            | 30  | 0,7 | 1,45E-04 | 3,48E-01 | 2,13E-03 |
| GOTERM_BP_FAT | GO:0008593~regulation of Notch signaling pathway                                | 17  | 0,4 | 1,46E-04 | 3,49E-01 | 2,12E-03 |
| GOTERM_BP_FAT | GO:0001667~ameboidal cell migration                                             | 20  | 0,5 | 1,50E-04 | 3,56E-01 | 2,17E-03 |
| GOTERM_BP_FAT | GO:0048547~gut morphogenesis                                                    | 26  | 0,6 | 1,66E-04 | 3,88E-01 | 2,40E-03 |
| GOTERM_BP_FAT | GO:0008052~sensory organ boundary specification                                 | 16  | 0,4 | 1,74E-04 | 4,00E-01 | 2,49E-03 |
| GOTERM_BP_FAT | GO:0007469~antennal development                                                 | 16  | 0,4 | 1,74E-04 | 4,00E-01 | 2,49E-03 |
| GOTERM_BP_FAT | GO:0046578~regulation of Ras protein signal transduction                        | 38  | 0,9 | 1,76E-04 | 4,05E-01 | 2,52E-03 |
| GOTERM_BP_FAT | GO:0040007~growth                                                               | 49  | 1,1 | 1,83E-04 | 4,17E-01 | 2,60E-03 |
| GOTERM_BP_FAT | GO:0007293~germarium-derived egg chamber formation                              | 32  | 0,7 | 1,92E-04 | 4,31E-01 | 2,71E-03 |
| GOTERM_BP_FAT | GO:0042461~photoreceptor cell development                                       | 32  | 0,7 | 1,92E-04 | 4,31E-01 | 2,71E-03 |
| GOTERM_BP_FAT | GO:0019953~sexual reproduction                                                  | 245 | 5,5 | 2,01E-04 | 4,47E-01 | 2,83E-03 |
| GOTERM_BP_FAT | GO:0048568~embryonic organ development                                          | 15  | 0,3 | 2,04E-04 | 4,51E-01 | 2,86E-03 |
| GOTERM_BP_FAT | GO:0046532~regulation of photoreceptor cell differentiation                     | 15  | 0,3 | 2,04E-04 | 4,51E-01 | 2,86E-03 |
| GOTERM_BP_FAT | GO:0007010~cytoskeleton organization                                            | 163 | 3,7 | 2,08E-04 | 4,57E-01 | 2,89E-03 |
| GOTERM_BP_FAT | GO:0035162~embryonic hemopoiesis                                                | 14  | 0,3 | 2,35E-04 | 5,00E-01 | 3,26E-03 |
| GOTERM_BP_FAT | GO:0035277~spiracle morphogenesis, open tracheal system                         | 14  | 0,3 | 2,35E-04 | 5,00E-01 | 3,26E-03 |
| GOTERM_BP_FAT | GO:0035317~imaginal disc-derived wing hair organization                         | 20  | 0,5 | 2,62E-04 | 5,38E-01 | 3,62E-03 |
| GOTERM_BP_FAT | GO:0030097~hemopoiesis                                                          | 24  | 0,5 | 2,71E-04 | 5,50E-01 | 3,72E-03 |
| GOTERM_BP_FAT | GO:0035088~establishment or maintenance of apical/basal cell polarity           | 17  | 0,4 | 2,82E-04 | 5,65E-01 | 3,86E-03 |
| GOTERM_BP_FAT | GO:0030111~regulation of Wnt receptor signaling pathway                         | 19  | 0,4 | 3,30E-04 | 6,21E-01 | 4,48E-03 |
| GOTERM_BP_FAT | GO:0030855~epithelial cell differentiation                                      | 16  | 0,4 | 3,45E-04 | 6,38E-01 | 4,68E-03 |
| GOTERM_BP_FAT | GO:0030031~cell projection assembly                                             | 32  | 0,7 | 3,89E-04 | 6,82E-01 | 5,24E-03 |
| GOTERM_BP_FAT | GO:0008258~head involution                                                      | 26  | 0,6 | 3,90E-04 | 6,83E-01 | 5,23E-03 |
| GOTERM_BP_FAT | GO:0055057~neuroblast division                                                  | 15  | 0,3 | 4,19E-04 | 7,09E-01 | 5,60E-03 |
| GOTERM_BP_FAT | GO:0055059~asymmetric neuroblast division                                       | 15  | 0,3 | 4,19E-04 | 7,09E-01 | 5,60E-03 |
| GOTERM_BP_FAT | GO:0060560~developmental growth involved in morphogenesis                       | 14  | 0,3 | 5,03E-04 | 7,73E-01 | 6,68E-03 |
| GOTERM_BP_FAT | GO:0016198~axon choice point recognition                                        | 14  | 0,3 | 5,03E-04 | 7,73E-01 | 6,68E-03 |
| GOTERM_BP_FAT | GO:0030178~negative regulation of Wnt receptor signaling pathway                | 14  | 0,3 | 5,03E-04 | 7,73E-01 | 6,68E-03 |
| GOTERM_BP_FAT | GO:0035051~cardiac cell differentiation                                         | 14  | 0,3 | 5,03E-04 | 7,73E-01 | 6,68E-03 |
| GOTERM_BP_FAT | GO:0045448~mitotic cell cycle, embryonic                                        | 17  | 0,4 | 5,17E-04 | 7,82E-01 | 6,84E-03 |
| GOTERM_BP_FAT | GO:0007611~learning or memory                                                   | 36  | 0,8 | 5,29E-04 | 7,90E-01 | 6,97E-03 |
| GOTERM_BP_FAT | GO:0051056~regulation of small GTPase mediated signal transduction              | 42  | 0,9 | 5,33E-04 | 7,92E-01 | 6,98E-03 |
| GOTERM_BP_FAT | GO:0016567~protein ubiquitination                                               | 23  | 0,5 | 5,39E-04 | 7,96E-01 | 7,04E-03 |
| GOTERM_BP_FAT | GO:0007442~hindgut morphogenesis                                                | 23  | 0,5 | 5,39E-04 | 7,96E-01 | 7,04E-03 |
| GOTERM_BP_FAT | GO:0030010~establishment of cell polarity                                       | 13  | 0,3 | 5,95E-04 | 8,27E-01 | 7,73E-03 |
| GOTERM_BP_FAT | GO:0007369~gastrulation                                                         | 34  | 0,8 | 6,30E-04 | 8,44E-01 | 8,15E-03 |
| GOTERM_BP_FAT | GO:0035017~cuticle pattern formation                                            | 16  | 0,4 | 6,45E-04 | 8,50E-01 | 8,30E-03 |
| GOTERM_BP_FAT | GO:0016318~ommatidial rotation                                                  | 16  | 0,4 | 6,45E-04 | 8,50E-01 | 8,30E-03 |
| GOTERM_BP_FAT | GO:0042051~compound eye photoreceptor development                               | 27  | 0,6 | 6,57E-04 | 8,56E-01 | 8,41E-03 |
| GOTERM_BP_FAT | GO:0000087~M phase of mitotic cell cycle                                        | 60  | 1,4 | 6,76E-04 | 8,63E-01 | 8,62E-03 |
| GOTERM_BP_FAT | GO:0032446~protein modification by small protein conjugation                    | 25  | 0,6 | 7,41E-04 | 8,87E-01 | 9,41E-03 |
| GOTERM_BP_FAT | GO:0070647~protein modification by small protein conjugation or removal         | 32  | 0,7 | 7,48E-04 | 8,89E-01 | 9,45E-03 |
| GOTERM_BP_FAT | GO:0046529~imaginal disc fusion, thorax closure                                 | 11  | 0,2 | 7,77E-04 | 8,99E-01 | 9,78E-03 |



|               |                                                                                                         |     |     |          |          |          |
|---------------|---------------------------------------------------------------------------------------------------------|-----|-----|----------|----------|----------|
| GOTERM_BP_FAT | GO:0045167~asymmetric protein localization involved in cell fate determination                          | 11  | 0,2 | 7,77E-04 | 8,99E-01 | 9,78E-03 |
| GOTERM_BP_FAT | GO:0016481~negative regulation of transcription                                                         | 79  | 1,8 | 7,88E-04 | 9,02E-01 | 9,87E-03 |
| GOTERM_BP_FAT | GO:0007067~mitosis                                                                                      | 59  | 1,3 | 8,27E-04 | 9,13E-01 | 1,03E-02 |
| GOTERM_BP_FAT | GO:0035111~leg joint morphogenesis                                                                      | 10  | 0,2 | 8,36E-04 | 9,15E-01 | 1,04E-02 |
| GOTERM_BP_FAT | GO:0051172~negative regulation of nitrogen compound metabolic process                                   | 84  | 1,9 | 8,43E-04 | 9,17E-01 | 1,04E-02 |
| GOTERM_BP_FAT | GO:0045934~negative regulation of nucleobase, nucleoside, nucleotide and nucleic acid metabolic process | 84  | 1,9 | 8,43E-04 | 9,17E-01 | 1,04E-02 |
| GOTERM_BP_FAT | GO:0035152~regulation of tube architecture, open tracheal system                                        | 21  | 0,5 | 8,85E-04 | 9,26E-01 | 1,09E-02 |
| GOTERM_BP_FAT | GO:0016333~morphogenesis of follicular epithelium                                                       | 17  | 0,4 | 9,01E-04 | 9,30E-01 | 1,10E-02 |
| GOTERM_BP_FAT | GO:0008293~torso signaling pathway                                                                      | 19  | 0,4 | 9,19E-04 | 9,33E-01 | 1,12E-02 |
| GOTERM_BP_FAT | GO:0042462~eye photoreceptor cell development                                                           | 27  | 0,6 | 9,39E-04 | 9,37E-01 | 1,14E-02 |
| GOTERM_BP_FAT | GO:0009890~negative regulation of biosynthetic process                                                  | 92  | 2,1 | 9,61E-04 | 9,41E-01 | 1,16E-02 |
| GOTERM_BP_FAT | GO:0031327~negative regulation of cellular biosynthetic process                                         | 92  | 2,1 | 9,61E-04 | 9,41E-01 | 1,16E-02 |
| GOTERM_BP_FAT | GO:0010558~negative regulation of macromolecule biosynthetic process                                    | 91  | 2,1 | 9,83E-04 | 9,45E-01 | 1,19E-02 |
| GOTERM_BP_FAT | GO:0010001~glial cell differentiation                                                                   | 14  | 0,3 | 9,89E-04 | 9,46E-01 | 1,19E-02 |
| GOTERM_BP_FAT | GO:0034330~cell junction organization                                                                   | 20  | 0,5 | 1,14E-03 | 9,65E-01 | 1,36E-02 |
| GOTERM_BP_FAT | GO:0006917~induction of apoptosis                                                                       | 16  | 0,4 | 1,14E-03 | 9,65E-01 | 1,36E-02 |
| GOTERM_BP_FAT | GO:0030718~germ-line stem cell maintenance                                                              | 16  | 0,4 | 1,14E-03 | 9,65E-01 | 1,36E-02 |
| GOTERM_BP_FAT | GO:0051130~positive regulation of cellular component organization                                       | 16  | 0,4 | 1,14E-03 | 9,65E-01 | 1,36E-02 |
| GOTERM_BP_FAT | GO:0040008~regulation of growth                                                                         | 44  | 1,0 | 1,18E-03 | 9,69E-01 | 1,40E-02 |
| GOTERM_BP_FAT | GO:0016360~sensory organ precursor cell fate determination                                              | 13  | 0,3 | 1,21E-03 | 9,72E-01 | 1,43E-02 |
| GOTERM_BP_FAT | GO:0007280~pole cell migration                                                                          | 13  | 0,3 | 1,21E-03 | 9,72E-01 | 1,43E-02 |
| GOTERM_BP_FAT | GO:0000280~nuclear division                                                                             | 59  | 1,3 | 1,22E-03 | 9,73E-01 | 1,43E-02 |
| GOTERM_BP_FAT | GO:0060446~branching involved in open tracheal system development                                       | 21  | 0,5 | 1,35E-03 | 9,81E-01 | 1,58E-02 |
| GOTERM_BP_FAT | GO:0048754~branching morphogenesis of a tube                                                            | 21  | 0,5 | 1,35E-03 | 9,81E-01 | 1,58E-02 |
| GOTERM_BP_FAT | GO:0043062~extracellular structure organization                                                         | 32  | 0,7 | 1,37E-03 | 9,82E-01 | 1,59E-02 |
| GOTERM_BP_FAT | GO:0051094~positive regulation of developmental process                                                 | 15  | 0,3 | 1,44E-03 | 9,86E-01 | 1,67E-02 |
| GOTERM_BP_FAT | GO:0000278~mitotic cell cycle                                                                           | 125 | 2,8 | 1,45E-03 | 9,86E-01 | 1,67E-02 |
| GOTERM_BP_FAT | GO:0035285~appendage segmentation                                                                       | 12  | 0,3 | 1,47E-03 | 9,87E-01 | 1,69E-02 |
| GOTERM_BP_FAT | GO:0035286~leg segmentation                                                                             | 12  | 0,3 | 1,47E-03 | 9,87E-01 | 1,69E-02 |
| GOTERM_BP_FAT | GO:0019991~septate junction assembly                                                                    | 12  | 0,3 | 1,47E-03 | 9,87E-01 | 1,69E-02 |
| GOTERM_BP_FAT | GO:0016319~mushroom body development                                                                    | 25  | 0,6 | 1,54E-03 | 9,89E-01 | 1,76E-02 |
| GOTERM_BP_FAT | GO:0060562~epithelial tube morphogenesis                                                                | 22  | 0,5 | 1,57E-03 | 9,90E-01 | 1,79E-02 |
| GOTERM_BP_FAT | GO:0001763~morphogenesis of a branching structure                                                       | 22  | 0,5 | 1,57E-03 | 9,90E-01 | 1,79E-02 |
| GOTERM_BP_FAT | GO:0008104~protein localization                                                                         | 135 | 3,0 | 1,69E-03 | 9,93E-01 | 1,92E-02 |
| GOTERM_BP_FAT | GO:0033301~cell cycle comprising mitosis without cytokinesis                                            | 11  | 0,2 | 1,76E-03 | 9,94E-01 | 1,99E-02 |
| GOTERM_BP_FAT | GO:0046528~imaginal disc fusion                                                                         | 11  | 0,2 | 1,76E-03 | 9,94E-01 | 1,99E-02 |
| GOTERM_BP_FAT | GO:0045570~regulation of imaginal disc growth                                                           | 11  | 0,2 | 1,76E-03 | 9,94E-01 | 1,99E-02 |
| GOTERM_BP_FAT | GO:0007428~primary branching, open tracheal system                                                      | 11  | 0,2 | 1,76E-03 | 9,94E-01 | 1,99E-02 |
| GOTERM_BP_FAT | GO:0007379~segment specification                                                                        | 23  | 0,5 | 1,77E-03 | 9,95E-01 | 2,00E-02 |
| GOTERM_BP_FAT | GO:0046620~regulation of organ growth                                                                   | 18  | 0,4 | 1,87E-03 | 9,96E-01 | 2,10E-02 |
| GOTERM_BP_FAT | GO:0048609~reproductive process in a multicellular organism                                             | 250 | 5,6 | 1,89E-03 | 9,96E-01 | 2,12E-02 |
| GOTERM_BP_FAT | GO:0032504~multicellular organism reproduction                                                          | 250 | 5,6 | 1,89E-03 | 9,96E-01 | 2,12E-02 |
| GOTERM_BP_FAT | GO:0048332~mesoderm morphogenesis                                                                       | 16  | 0,4 | 1,92E-03 | 9,96E-01 | 2,13E-02 |
| GOTERM_BP_FAT | GO:0010002~cardioblast differentiation                                                                  | 10  | 0,2 | 2,05E-03 | 9,98E-01 | 2,28E-02 |
| GOTERM_BP_FAT | GO:0007440~foregut morphogenesis                                                                        | 10  | 0,2 | 2,05E-03 | 9,98E-01 | 2,28E-02 |
| GOTERM_BP_FAT | GO:0045216~cell-cell junction organization                                                              | 19  | 0,4 | 2,24E-03 | 9,99E-01 | 2,47E-02 |
| GOTERM_BP_FAT | GO:0010721~negative regulation of cell development                                                      | 13  | 0,3 | 2,28E-03 | 9,99E-01 | 2,50E-02 |
| GOTERM_BP_FAT | GO:0007465~R7 cell fate commitment                                                                      | 13  | 0,3 | 2,28E-03 | 9,99E-01 | 2,50E-02 |
| GOTERM_BP_FAT | GO:0009408~response to heat                                                                             | 31  | 0,7 | 2,30E-03 | 9,99E-01 | 2,52E-02 |
| GOTERM_BP_FAT | GO:0002164~larval development                                                                           | 31  | 0,7 | 2,30E-03 | 9,99E-01 | 2,52E-02 |
| GOTERM_BP_FAT | GO:0008406~gonad development                                                                            | 17  | 0,4 | 2,40E-03 | 9,99E-01 | 2,62E-02 |
| GOTERM_BP_FAT | GO:0042306~regulation of protein import into nucleus                                                    | 17  | 0,4 | 2,40E-03 | 9,99E-01 | 2,62E-02 |
| GOTERM_BP_FAT | GO:0048608~reproductive structure development                                                           | 17  | 0,4 | 2,40E-03 | 9,99E-01 | 2,62E-02 |
| GOTERM_BP_FAT | GO:0007283~spermatogenesis                                                                              | 60  | 1,4 | 2,49E-03 | 9,99E-01 | 2,70E-02 |
| GOTERM_BP_FAT | GO:0048232~male gamete generation                                                                       | 60  | 1,4 | 2,49E-03 | 9,99E-01 | 2,70E-02 |
| GOTERM_BP_FAT | GO:0006915~apoptosis                                                                                    | 34  | 0,8 | 2,55E-03 | 9,99E-01 | 2,75E-02 |
| GOTERM_BP_FAT | GO:0007292~female gamete generation                                                                     | 180 | 4,1 | 2,71E-03 | 1,00E+00 | 2,92E-02 |
| GOTERM_BP_FAT | GO:0007143~female meiosis                                                                               | 29  | 0,7 | 2,78E-03 | 1,00E+00 | 2,98E-02 |
| GOTERM_BP_FAT | GO:0007224~smoothed signaling pathway                                                                   | 18  | 0,4 | 2,88E-03 | 1,00E+00 | 3,07E-02 |
| GOTERM_BP_FAT | GO:0048285~organelle fission                                                                            | 59  | 1,3 | 3,00E-03 | 1,00E+00 | 3,19E-02 |
| GOTERM_BP_FAT | GO:0007494~midgut development                                                                           | 16  | 0,4 | 3,09E-03 | 1,00E+00 | 3,27E-02 |
| GOTERM_BP_FAT | GO:0042058~regulation of epidermal growth factor receptor signaling pathway                             | 14  | 0,3 | 3,13E-03 | 1,00E+00 | 3,30E-02 |
| GOTERM_BP_FAT | GO:0030720~oocyte localization during germline-derived egg chamber formation                            | 11  | 0,2 | 3,54E-03 | 1,00E+00 | 3,71E-02 |
| GOTERM_BP_FAT | GO:0021782~glial cell development                                                                       | 11  | 0,2 | 3,54E-03 | 1,00E+00 | 3,71E-02 |
| GOTERM_BP_FAT | GO:0000819~sister chromatid segregation                                                                 | 23  | 0,5 | 3,54E-03 | 1,00E+00 | 3,70E-02 |
| GOTERM_BP_FAT | GO:0010605~negative regulation of macromolecule metabolic process                                       | 110 | 2,5 | 3,56E-03 | 1,00E+00 | 3,71E-02 |
| GOTERM_BP_FAT | GO:0033157~regulation of intracellular protein transport                                                | 17  | 0,4 | 3,71E-03 | 1,00E+00 | 3,85E-02 |
| GOTERM_BP_FAT | GO:0048511~rhythmic process                                                                             | 24  | 0,5 | 3,81E-03 | 1,00E+00 | 3,93E-02 |
| GOTERM_BP_FAT | GO:0001707~mesoderm formation                                                                           | 15  | 0,3 | 3,98E-03 | 1,00E+00 | 4,09E-02 |
| GOTERM_BP_FAT | GO:0007426~tracheal outgrowth, open tracheal system                                                     | 13  | 0,3 | 3,99E-03 | 1,00E+00 | 4,09E-02 |
| GOTERM_BP_FAT | GO:0035287~head segmentation                                                                            | 13  | 0,3 | 3,99E-03 | 1,00E+00 | 4,09E-02 |
| GOTERM_BP_FAT | GO:0050808~synapse organization                                                                         | 21  | 0,5 | 4,17E-03 | 1,00E+00 | 4,25E-02 |
| GOTERM_BP_FAT | GO:0007264~small GTPase mediated signal transduction                                                    | 44  | 1,0 | 4,29E-03 | 1,00E+00 | 4,36E-02 |
| GOTERM_BP_FAT | GO:0008105~asymmetric protein localization                                                              | 18  | 0,4 | 4,30E-03 | 1,00E+00 | 4,36E-02 |
| GOTERM_BP_FAT | GO:0035186~syncytial blastoderm mitotic cell cycle                                                      | 10  | 0,2 | 4,35E-03 | 1,00E+00 | 4,39E-02 |
| GOTERM_BP_FAT | GO:0048854~brain morphogenesis                                                                          | 10  | 0,2 | 4,35E-03 | 1,00E+00 | 4,39E-02 |
| GOTERM_BP_FAT | GO:0007539~primary sex determination, soma                                                              | 10  | 0,2 | 4,35E-03 | 1,00E+00 | 4,39E-02 |
| GOTERM_BP_FAT | GO:0035099~hemocyte migration                                                                           | 10  | 0,2 | 4,35E-03 | 1,00E+00 | 4,39E-02 |
| GOTERM_BP_FAT | GO:0001964~startle response                                                                             | 10  | 0,2 | 4,35E-03 | 1,00E+00 | 4,39E-02 |
| GOTERM_BP_FAT | GO:0031987~locomotion involved in locomotory behavior                                                   | 10  | 0,2 | 4,35E-03 | 1,00E+00 | 4,39E-02 |
| GOTERM_BP_FAT | GO:0010623~developmental programmed cell death                                                          | 10  | 0,2 | 4,35E-03 | 1,00E+00 | 4,39E-02 |
| GOTERM_BP_FAT | GO:0051253~negative regulation of RNA metabolic process                                                 | 71  | 1,6 | 4,36E-03 | 1,00E+00 | 4,39E-02 |
| GOTERM_BP_FAT | GO:0048477~oogenesis                                                                                    | 176 | 4,0 | 4,71E-03 | 1,00E+00 | 4,71E-02 |
| GOTERM_BP_FAT | GO:0016049~cell growth                                                                                  | 23  | 0,5 | 4,86E-03 | 1,00E+00 | 4,85E-02 |
| GOTERM_BP_FAT | GO:0051336~regulation of hydrolase activity                                                             | 31  | 0,7 | 5,03E-03 | 1,00E+00 | 4,99E-02 |
| GOTERM_BP_FAT | GO:0050768~negative regulation of neurogenesis                                                          | 12  | 0,3 | 5,09E-03 | 1,00E+00 | 5,04E-02 |
| GOTERM_BP_FAT | GO:0046660~female sex differentiation                                                                   | 12  | 0,3 | 5,09E-03 | 1,00E+00 | 5,04E-02 |
| GOTERM_BP_FAT | GO:0051017~actin filament bundle formation                                                              | 12  | 0,3 | 5,09E-03 | 1,00E+00 | 5,04E-02 |
| GOTERM_BP_FAT | GO:0042692~muscle cell differentiation                                                                  | 32  | 0,7 | 5,12E-03 | 1,00E+00 | 5,04E-02 |
| GOTERM_BP_FAT | GO:0048638~regulation of developmental growth                                                           | 20  | 0,5 | 5,36E-03 | 1,00E+00 | 5,25E-02 |
| GOTERM_BP_FAT | GO:0030162~regulation of proteolysis                                                                    | 20  | 0,5 | 5,36E-03 | 1,00E+00 | 5,25E-02 |
| GOTERM_BP_FAT | GO:0060538~skeletal muscle organ development                                                            | 26  | 0,6 | 5,66E-03 | 1,00E+00 | 5,52E-02 |
| GOTERM_BP_FAT | GO:0051297~centrosome organization                                                                      | 21  | 0,5 | 5,81E-03 | 1,00E+00 | 5,65E-02 |
| GOTERM_BP_FAT | GO:0007243~protein kinase cascade                                                                       | 27  | 0,6 | 5,86E-03 | 1,00E+00 | 5,68E-02 |
| GOTERM_BP_FAT | GO:0000070~mitotic sister chromatid segregation                                                         | 22  | 0,5 | 6,22E-03 | 1,00E+00 | 6,00E-02 |

|               |                                                                                  |    |     |          |          |          |
|---------------|----------------------------------------------------------------------------------|----|-----|----------|----------|----------|
| GOTERM_BP_FAT | GO:0051656~establishment of organelle localization                               | 32 | 0,7 | 6,47E-03 | 1,00E+00 | 6,21E-02 |
| GOTERM_BP_FAT | GO:0048871~multicellular organismal homeostasis                                  | 11 | 0,2 | 6,49E-03 | 1,00E+00 | 6,21E-02 |
| GOTERM_BP_FAT | GO:0035290~trunk segmentation                                                    | 11 | 0,2 | 6,49E-03 | 1,00E+00 | 6,21E-02 |
| GOTERM_BP_FAT | GO:0001737~establishment of imaginal disc-derived wing hair orientation          | 11 | 0,2 | 6,49E-03 | 1,00E+00 | 6,21E-02 |
| GOTERM_BP_FAT | GO:0016476~regulation of embryonic cell shape                                    | 11 | 0,2 | 6,49E-03 | 1,00E+00 | 6,21E-02 |
| GOTERM_BP_FAT | GO:0001894~tissue homeostasis                                                    | 11 | 0,2 | 6,49E-03 | 1,00E+00 | 6,21E-02 |
| GOTERM_BP_FAT | GO:0007623~circadian rhythm                                                      | 23 | 0,5 | 6,58E-03 | 1,00E+00 | 6,27E-02 |
| GOTERM_BP_FAT | GO:0045610~regulation of hemocyte differentiation                                | 13 | 0,3 | 6,61E-03 | 1,00E+00 | 6,28E-02 |
| GOTERM_BP_FAT | GO:0032880~regulation of protein localization                                    | 19 | 0,4 | 6,89E-03 | 1,00E+00 | 6,52E-02 |
| GOTERM_BP_FAT | GO:0008354~germ cell migration                                                   | 19 | 0,4 | 6,89E-03 | 1,00E+00 | 6,52E-02 |
| GOTERM_BP_FAT | GO:0045892~negative regulation of transcription, DNA-dependent                   | 68 | 1,5 | 7,17E-03 | 1,00E+00 | 6,76E-02 |
| GOTERM_BP_FAT | GO:0048588~developmental cell growth                                             | 16 | 0,4 | 7,18E-03 | 1,00E+00 | 6,74E-02 |
| GOTERM_BP_FAT | GO:0016568~chromatin modification                                                | 44 | 1,0 | 7,55E-03 | 1,00E+00 | 7,05E-02 |
| GOTERM_BP_FAT | GO:0019730~antimicrobial humoral response                                        | 30 | 0,7 | 7,98E-03 | 1,00E+00 | 7,42E-02 |
| GOTERM_BP_FAT | GO:0007530~sex determination                                                     | 14 | 0,3 | 8,02E-03 | 1,00E+00 | 7,44E-02 |
| GOTERM_BP_FAT | GO:0009266~response to temperature stimulus                                      | 31 | 0,7 | 8,06E-03 | 1,00E+00 | 7,44E-02 |
| GOTERM_BP_FAT | GO:0048634~regulation of muscle development                                      | 17 | 0,4 | 8,07E-03 | 1,00E+00 | 7,44E-02 |
| GOTERM_BP_FAT | GO:0051223~regulation of protein transport                                       | 17 | 0,4 | 8,07E-03 | 1,00E+00 | 7,44E-02 |
| GOTERM_BP_FAT | GO:0070201~regulation of establishment of protein localization                   | 17 | 0,4 | 8,07E-03 | 1,00E+00 | 7,44E-02 |
| GOTERM_BP_FAT | GO:0046822~regulation of nucleocytoplasmic transport                             | 17 | 0,4 | 8,07E-03 | 1,00E+00 | 7,44E-02 |
| GOTERM_BP_FAT | GO:0051640~organelle localization                                                | 34 | 0,8 | 8,15E-03 | 1,00E+00 | 7,48E-02 |
| GOTERM_BP_FAT | GO:0051293~establishment of spindle localization                                 | 10 | 0,2 | 8,24E-03 | 1,00E+00 | 7,54E-02 |
| GOTERM_BP_FAT | GO:0007432~salivary gland boundary specification                                 | 10 | 0,2 | 8,24E-03 | 1,00E+00 | 7,54E-02 |
| GOTERM_BP_FAT | GO:0050905~neuromuscular process                                                 | 10 | 0,2 | 8,24E-03 | 1,00E+00 | 7,54E-02 |
| GOTERM_BP_FAT | GO:0016199~axon midline choice point recognition                                 | 10 | 0,2 | 8,24E-03 | 1,00E+00 | 7,54E-02 |
| GOTERM_BP_FAT | GO:0051653~spindle localization                                                  | 10 | 0,2 | 8,24E-03 | 1,00E+00 | 7,54E-02 |
| GOTERM_BP_FAT | GO:0031023~microtubule organizing center organization                            | 22 | 0,5 | 8,38E-03 | 1,00E+00 | 7,63E-02 |
| GOTERM_BP_FAT | GO:0045197~establishment or maintenance of epithelial cell apical/basal polarity | 12 | 0,3 | 8,54E-03 | 1,00E+00 | 7,75E-02 |
| GOTERM_BP_FAT | GO:0008347~glial cell migration                                                  | 12 | 0,3 | 8,54E-03 | 1,00E+00 | 7,75E-02 |
| GOTERM_BP_FAT | GO:0043069~negative regulation of programmed cell death                          | 23 | 0,5 | 8,75E-03 | 1,00E+00 | 7,91E-02 |
| GOTERM_BP_FAT | GO:0007613~memory                                                                | 18 | 0,4 | 8,87E-03 | 1,00E+00 | 7,99E-02 |
| GOTERM_BP_FAT | GO:0007173~epidermal growth factor receptor signaling pathway                    | 18 | 0,4 | 8,87E-03 | 1,00E+00 | 7,99E-02 |
| GOTERM_BP_FAT | GO:0007098~centrosome cycle                                                      | 18 | 0,4 | 8,87E-03 | 1,00E+00 | 7,99E-02 |
| GOTERM_BP_FAT | GO:0035150~regulation of tube size                                               | 13 | 0,3 | 1,04E-02 | 1,00E+00 | 9,29E-02 |
| GOTERM_BP_FAT | GO:0018993~somatic sex determination                                             | 11 | 0,2 | 1,10E-02 | 1,00E+00 | 9,80E-02 |
| GOTERM_BP_FAT | GO:0006914~autophagy                                                             | 11 | 0,2 | 1,10E-02 | 1,00E+00 | 9,80E-02 |
| GOTERM_BP_FAT | GO:0048675~axon extension                                                        | 11 | 0,2 | 1,10E-02 | 1,00E+00 | 9,80E-02 |
| GOTERM_BP_FAT | GO:0016334~establishment or maintenance of polarity of follicular epithelium     | 11 | 0,2 | 1,10E-02 | 1,00E+00 | 9,80E-02 |
| GOTERM_BP_FAT | GO:0032386~regulation of intracellular transport                                 | 17 | 0,4 | 1,14E-02 | 1,00E+00 | 1,01E-01 |
| GOTERM_BP_FAT | GO:0007626~locomotory behavior                                                   | 65 | 1,5 | 1,16E-02 | 1,00E+00 | 1,02E-01 |
| GOTERM_BP_FAT | GO:0006333~chromatin assembly or disassembly                                     | 25 | 0,6 | 1,20E-02 | 1,00E+00 | 1,05E-01 |
| GOTERM_BP_FAT | GO:0010629~negative regulation of gene expression                                | 88 | 2,0 | 1,20E-02 | 1,00E+00 | 1,05E-01 |
| GOTERM_BP_FAT | GO:0008361~regulation of cell size                                               | 31 | 0,7 | 1,25E-02 | 1,00E+00 | 1,08E-01 |
| GOTERM_BP_FAT | GO:0016339~calcium-dependent cell-cell adhesion                                  | 12 | 0,3 | 1,35E-02 | 1,00E+00 | 1,17E-01 |
| GOTERM_BP_FAT | GO:0046545~development of primary female sexual characteristics                  | 10 | 0,2 | 1,43E-02 | 1,00E+00 | 1,23E-01 |
| GOTERM_BP_FAT | GO:0045746~negative regulation of Notch signaling pathway                        | 10 | 0,2 | 1,43E-02 | 1,00E+00 | 1,23E-01 |
| GOTERM_BP_FAT | GO:0051303~establishment of chromosome localization                              | 10 | 0,2 | 1,43E-02 | 1,00E+00 | 1,23E-01 |
| GOTERM_BP_FAT | GO:0050000~chromosome localization                                               | 10 | 0,2 | 1,43E-02 | 1,00E+00 | 1,23E-01 |
| GOTERM_BP_FAT | GO:0007474~imaginal disc-derived wing vein specification                         | 16 | 0,4 | 1,47E-02 | 1,00E+00 | 1,26E-01 |
| GOTERM_BP_FAT | GO:0007612~learning                                                              | 24 | 0,5 | 1,51E-02 | 1,00E+00 | 1,28E-01 |
| GOTERM_BP_FAT | GO:0042335~cuticle development                                                   | 27 | 0,6 | 1,54E-02 | 1,00E+00 | 1,31E-01 |
| GOTERM_BP_FAT | GO:0016203~muscle attachment                                                     | 13 | 0,3 | 1,57E-02 | 1,00E+00 | 1,32E-01 |
| GOTERM_BP_FAT | GO:0045786~negative regulation of cell cycle                                     | 13 | 0,3 | 1,57E-02 | 1,00E+00 | 1,32E-01 |
| GOTERM_BP_FAT | GO:0048542~lymph gland development                                               | 13 | 0,3 | 1,57E-02 | 1,00E+00 | 1,32E-01 |
| GOTERM_BP_FAT | GO:0010627~regulation of protein kinase cascade                                  | 20 | 0,5 | 1,79E-02 | 1,00E+00 | 1,49E-01 |
| GOTERM_BP_FAT | GO:0042330~taxis                                                                 | 20 | 0,5 | 1,79E-02 | 1,00E+00 | 1,49E-01 |
| GOTERM_BP_FAT | GO:0050953~sensory perception of light stimulus                                  | 29 | 0,7 | 1,90E-02 | 1,00E+00 | 1,57E-01 |
| GOTERM_BP_FAT | GO:0001704~formation of primary germ layer                                       | 15 | 0,3 | 1,90E-02 | 1,00E+00 | 1,57E-01 |
| GOTERM_BP_FAT | GO:0051146~striated muscle cell differentiation                                  | 27 | 0,6 | 1,92E-02 | 1,00E+00 | 1,58E-01 |
| GOTERM_BP_FAT | GO:0006366~transcription from RNA polymerase II promoter                         | 38 | 0,9 | 1,99E-02 | 1,00E+00 | 1,63E-01 |
| GOTERM_BP_FAT | GO:0032535~regulation of cellular component size                                 | 38 | 0,9 | 1,99E-02 | 1,00E+00 | 1,63E-01 |
| GOTERM_BP_FAT | GO:0007416~synaptogenesis                                                        | 12 | 0,3 | 2,05E-02 | 1,00E+00 | 1,67E-01 |
| GOTERM_BP_FAT | GO:0007616~long-term memory                                                      | 12 | 0,3 | 2,05E-02 | 1,00E+00 | 1,67E-01 |
| GOTERM_BP_FAT | GO:0007362~terminal region determination                                         | 12 | 0,3 | 2,05E-02 | 1,00E+00 | 1,67E-01 |
| GOTERM_BP_FAT | GO:0006164~purine nucleotide biosynthetic process                                | 46 | 1,0 | 2,24E-02 | 1,00E+00 | 1,80E-01 |
| GOTERM_BP_FAT | GO:0051325~interphase                                                            | 13 | 0,3 | 2,28E-02 | 1,00E+00 | 1,83E-01 |
| GOTERM_BP_FAT | GO:0051329~interphase of mitotic cell cycle                                      | 13 | 0,3 | 2,28E-02 | 1,00E+00 | 1,83E-01 |
| GOTERM_BP_FAT | GO:0045465~R8 cell differentiation                                               | 10 | 0,2 | 2,31E-02 | 1,00E+00 | 1,85E-01 |
| GOTERM_BP_FAT | GO:0044093~positive regulation of molecular function                             | 29 | 0,7 | 2,31E-02 | 1,00E+00 | 1,84E-01 |
| GOTERM_BP_FAT | GO:0008355~olfactory learning                                                    | 21 | 0,5 | 2,35E-02 | 1,00E+00 | 1,87E-01 |
| GOTERM_BP_FAT | GO:0060548~negative regulation of cell death                                     | 23 | 0,5 | 2,38E-02 | 1,00E+00 | 1,89E-01 |
| GOTERM_BP_FAT | GO:0045132~meiotic chromosome segregation                                        | 24 | 0,5 | 2,39E-02 | 1,00E+00 | 1,88E-01 |
| GOTERM_BP_FAT | GO:0042127~regulation of cell proliferation                                      | 24 | 0,5 | 2,39E-02 | 1,00E+00 | 1,88E-01 |
| GOTERM_BP_FAT | GO:0042752~regulation of circadian rhythm                                        | 14 | 0,3 | 2,46E-02 | 1,00E+00 | 1,93E-01 |
| GOTERM_BP_FAT | GO:0042078~germ-line stem cell division                                          | 14 | 0,3 | 2,46E-02 | 1,00E+00 | 1,93E-01 |
| GOTERM_BP_FAT | GO:0031098~stress-activated protein kinase signaling pathway                     | 15 | 0,3 | 2,61E-02 | 1,00E+00 | 2,03E-01 |
| GOTERM_BP_FAT | GO:0048747~muscle fiber development                                              | 15 | 0,3 | 2,61E-02 | 1,00E+00 | 2,03E-01 |
| GOTERM_BP_FAT | GO:0035151~regulation of tube size, open tracheal system                         | 11 | 0,2 | 2,68E-02 | 1,00E+00 | 2,07E-01 |
| GOTERM_BP_FAT | GO:0007448~anterior/posterior pattern formation, imaginal disc                   | 11 | 0,2 | 2,68E-02 | 1,00E+00 | 2,07E-01 |
| GOTERM_BP_FAT | GO:0032774~RNA biosynthetic process                                              | 49 | 1,1 | 2,71E-02 | 1,00E+00 | 2,09E-01 |
| GOTERM_BP_FAT | GO:0016321~female meiosis chromosome segregation                                 | 16 | 0,4 | 2,73E-02 | 1,00E+00 | 2,10E-01 |
| GOTERM_BP_FAT | GO:0008586~imaginal disc-derived wing vein morphogenesis                         | 16 | 0,4 | 2,73E-02 | 1,00E+00 | 2,10E-01 |
| GOTERM_BP_FAT | GO:0006352~transcription initiation                                              | 29 | 0,7 | 2,79E-02 | 1,00E+00 | 2,13E-01 |
| GOTERM_BP_FAT | GO:0006351~transcription, DNA-dependent                                          | 48 | 1,1 | 2,79E-02 | 1,00E+00 | 2,13E-01 |
| GOTERM_BP_FAT | GO:0007601~visual perception                                                     | 28 | 0,6 | 2,83E-02 | 1,00E+00 | 2,15E-01 |
| GOTERM_BP_FAT | GO:0006163~purine nucleotide metabolic process                                   | 47 | 1,1 | 2,87E-02 | 1,00E+00 | 2,17E-01 |
| GOTERM_BP_FAT | GO:0030036~actin cytoskeleton organization                                       | 51 | 1,1 | 2,91E-02 | 1,00E+00 | 2,20E-01 |
| GOTERM_BP_FAT | GO:0060249~anatomical structure homeostasis                                      | 19 | 0,4 | 2,93E-02 | 1,00E+00 | 2,20E-01 |
| GOTERM_BP_FAT | GO:0000768~syncytium formation by plasma membrane fusion                         | 12 | 0,3 | 2,97E-02 | 1,00E+00 | 2,22E-01 |
| GOTERM_BP_FAT | GO:0014902~myotube differentiation                                               | 12 | 0,3 | 2,97E-02 | 1,00E+00 | 2,22E-01 |
| GOTERM_BP_FAT | GO:0007520~myoblast fusion                                                       | 12 | 0,3 | 2,97E-02 | 1,00E+00 | 2,22E-01 |
| GOTERM_BP_FAT | GO:0009611~response to wounding                                                  | 12 | 0,3 | 2,97E-02 | 1,00E+00 | 2,22E-01 |
| GOTERM_BP_FAT | GO:0006643~membrane lipid metabolic process                                      | 12 | 0,3 | 2,97E-02 | 1,00E+00 | 2,22E-01 |
| GOTERM_BP_FAT | GO:0006949~syncytium formation                                                   | 12 | 0,3 | 2,97E-02 | 1,00E+00 | 2,22E-01 |
| GOTERM_BP_FAT | GO:0035265~organ growth                                                          | 12 | 0,3 | 2,97E-02 | 1,00E+00 | 2,22E-01 |

|               |                                                                                     |     |     |          |          |          |
|---------------|-------------------------------------------------------------------------------------|-----|-----|----------|----------|----------|
| GOTERM_BP_FAT | GO:0016569~covalent chromatin modification                                          | 23  | 0,5 | 2,97E-02 | 1,00E+00 | 2,22E-01 |
| GOTERM_BP_FAT | GO:0016570~histone modification                                                     | 23  | 0,5 | 2,97E-02 | 1,00E+00 | 2,22E-01 |
| GOTERM_BP_FAT | GO:0007015~actin filament organization                                              | 32  | 0,7 | 3,15E-02 | 1,00E+00 | 2,33E-01 |
| GOTERM_BP_FAT | GO:0006959~humoral immune response                                                  | 32  | 0,7 | 3,15E-02 | 1,00E+00 | 2,33E-01 |
| GOTERM_BP_FAT | GO:0030029~actin filament-based process                                             | 51  | 1,1 | 3,30E-02 | 1,00E+00 | 2,43E-01 |
| GOTERM_BP_FAT | GO:0006334~nucleosome assembly                                                      | 14  | 0,3 | 3,37E-02 | 1,00E+00 | 2,46E-01 |
| GOTERM_BP_FAT | GO:0007254~JNK cascade                                                              | 14  | 0,3 | 3,37E-02 | 1,00E+00 | 2,46E-01 |
| GOTERM_BP_FAT | GO:0045926~negative regulation of growth                                            | 14  | 0,3 | 3,37E-02 | 1,00E+00 | 2,46E-01 |
| GOTERM_BP_FAT | GO:0007354~zygotic determination of anterior/posterior axis, embryo                 | 14  | 0,3 | 3,37E-02 | 1,00E+00 | 2,46E-01 |
| GOTERM_BP_FAT | GO:0009259~ribonucleotide metabolic process                                         | 41  | 0,9 | 3,41E-02 | 1,00E+00 | 2,48E-01 |
| GOTERM_BP_FAT | GO:0048619~embryonic hindgut morphogenesis                                          | 15  | 0,3 | 3,50E-02 | 1,00E+00 | 2,53E-01 |
| GOTERM_BP_FAT | GO:0006323~DNA packaging                                                            | 26  | 0,6 | 3,52E-02 | 1,00E+00 | 2,54E-01 |
| GOTERM_BP_FAT | GO:0015849~organic acid transport                                                   | 22  | 0,5 | 3,69E-02 | 1,00E+00 | 2,64E-01 |
| GOTERM_BP_FAT | GO:0046942~carboxylic acid transport                                                | 22  | 0,5 | 3,69E-02 | 1,00E+00 | 2,64E-01 |
| GOTERM_BP_FAT | GO:0009124~nucleoside monophosphate biosynthetic process                            | 21  | 0,5 | 3,71E-02 | 1,00E+00 | 2,65E-01 |
| GOTERM_BP_FAT | GO:0051235~maintenance of location                                                  | 20  | 0,5 | 3,72E-02 | 1,00E+00 | 2,65E-01 |
| GOTERM_BP_FAT | GO:0048134~germ-line cyst formation                                                 | 11  | 0,2 | 3,88E-02 | 1,00E+00 | 2,74E-01 |
| GOTERM_BP_FAT | GO:0042990~regulation of transcription factor import into nucleus                   | 11  | 0,2 | 3,88E-02 | 1,00E+00 | 2,74E-01 |
| GOTERM_BP_FAT | GO:0046700~heterocycle catabolic process                                            | 11  | 0,2 | 3,88E-02 | 1,00E+00 | 2,74E-01 |
| GOTERM_BP_FAT | GO:0009150~purine ribonucleotide metabolic process                                  | 39  | 0,9 | 4,15E-02 | 1,00E+00 | 2,89E-01 |
| GOTERM_BP_FAT | GO:0009260~ribonucleotide biosynthetic process                                      | 39  | 0,9 | 4,15E-02 | 1,00E+00 | 2,89E-01 |
| GOTERM_BP_FAT | GO:0007265~Ras protein signal transduction                                          | 13  | 0,3 | 4,35E-02 | 1,00E+00 | 3,01E-01 |
| GOTERM_BP_FAT | GO:0016202~regulation of striated muscle tissue development                         | 14  | 0,3 | 4,49E-02 | 1,00E+00 | 3,08E-01 |
| GOTERM_BP_FAT | GO:0051248~negative regulation of protein metabolic process                         | 22  | 0,5 | 4,52E-02 | 1,00E+00 | 3,09E-01 |
| GOTERM_BP_FAT | GO:0009123~nucleoside monophosphate metabolic process                               | 22  | 0,5 | 4,52E-02 | 1,00E+00 | 3,09E-01 |
| GOTERM_BP_FAT | GO:0031497~chromatin assembly                                                       | 16  | 0,4 | 4,64E-02 | 1,00E+00 | 3,16E-01 |
| GOTERM_BP_FAT | GO:0043066~negative regulation of apoptosis                                         | 19  | 0,4 | 4,65E-02 | 1,00E+00 | 3,16E-01 |
| GOTERM_BP_FAT | GO:0000226~microtubule cytoskeleton organization                                    | 96  | 2,2 | 4,96E-02 | 1,00E+00 | 3,32E-01 |
| GOTERM_BP_FAT | GO:0009152~purine ribonucleotide biosynthetic process                               | 37  | 0,8 | 5,05E-02 | 1,00E+00 | 3,36E-01 |
| GOTERM_BP_FAT | GO:0001666~response to hypoxia                                                      | 10  | 0,2 | 5,08E-02 | 1,00E+00 | 3,38E-01 |
| GOTERM_BP_FAT | GO:0070482~response to oxygen levels                                                | 10  | 0,2 | 5,08E-02 | 1,00E+00 | 3,38E-01 |
| GOTERM_BP_FAT | GO:0006897~endocytosis                                                              | 84  | 1,9 | 5,20E-02 | 1,00E+00 | 3,44E-01 |
| GOTERM_BP_FAT | GO:0010324~membrane invagination                                                    | 84  | 1,9 | 5,20E-02 | 1,00E+00 | 3,44E-01 |
| GOTERM_BP_FAT | GO:0016044~membrane organization                                                    | 102 | 2,3 | 5,21E-02 | 1,00E+00 | 3,43E-01 |
| GOTERM_BP_FAT | GO:0007610~behavior                                                                 | 134 | 3,0 | 5,39E-02 | 1,00E+00 | 3,52E-01 |
| GOTERM_BP_FAT | GO:0007446~imaginal disc growth                                                     | 11  | 0,2 | 5,40E-02 | 1,00E+00 | 3,52E-01 |
| GOTERM_BP_FAT | GO:0035023~regulation of Rho protein signal transduction                            | 13  | 0,3 | 5,76E-02 | 1,00E+00 | 3,70E-01 |
| GOTERM_BP_FAT | GO:0007622~rhythmic behavior                                                        | 17  | 0,4 | 5,85E-02 | 1,00E+00 | 3,74E-01 |
| GOTERM_BP_FAT | GO:0043408~regulation of MAPKKK cascade                                             | 15  | 0,3 | 5,88E-02 | 1,00E+00 | 3,75E-01 |
| GOTERM_BP_FAT | GO:0045185~maintenance of protein location                                          | 16  | 0,4 | 5,88E-02 | 1,00E+00 | 3,74E-01 |
| GOTERM_BP_FAT | GO:0051129~negative regulation of cellular component organization                   | 22  | 0,5 | 6,56E-02 | 1,00E+00 | 4,08E-01 |
| GOTERM_BP_FAT | GO:0032269~negative regulation of cellular protein metabolic process                | 21  | 0,5 | 6,71E-02 | 1,00E+00 | 4,14E-01 |
| GOTERM_BP_FAT | GO:0006820~anion transport                                                          | 19  | 0,4 | 6,99E-02 | 1,00E+00 | 4,26E-01 |
| GOTERM_BP_FAT | GO:0010948~negative regulation of cell cycle process                                | 10  | 0,2 | 7,05E-02 | 1,00E+00 | 4,29E-01 |
| GOTERM_BP_FAT | GO:0007390~germ-band shortening                                                     | 10  | 0,2 | 7,05E-02 | 1,00E+00 | 4,29E-01 |
| GOTERM_BP_FAT | GO:0009165~nucleotide biosynthetic process                                          | 51  | 1,1 | 7,26E-02 | 1,00E+00 | 4,37E-01 |
| GOTERM_BP_FAT | GO:0035075~response to ecdysone                                                     | 11  | 0,2 | 7,28E-02 | 1,00E+00 | 4,37E-01 |
| GOTERM_BP_FAT | GO:0007097~nuclear migration                                                        | 11  | 0,2 | 7,28E-02 | 1,00E+00 | 4,37E-01 |
| GOTERM_BP_FAT | GO:0048545~response to steroid hormone stimulus                                     | 11  | 0,2 | 7,28E-02 | 1,00E+00 | 4,37E-01 |
| GOTERM_BP_FAT | GO:0051345~positive regulation of hydrolase activity                                | 11  | 0,2 | 7,28E-02 | 1,00E+00 | 4,37E-01 |
| GOTERM_BP_FAT | GO:0048512~circadian behavior                                                       | 16  | 0,4 | 7,33E-02 | 1,00E+00 | 4,39E-01 |
| GOTERM_BP_FAT | GO:0031344~regulation of cell projection organization                               | 16  | 0,4 | 7,33E-02 | 1,00E+00 | 4,39E-01 |
| GOTERM_BP_FAT | GO:0051050~positive regulation of transport                                         | 12  | 0,3 | 7,40E-02 | 1,00E+00 | 4,41E-01 |
| GOTERM_BP_FAT | GO:0040023~establishment of nucleus localization                                    | 12  | 0,3 | 7,40E-02 | 1,00E+00 | 4,41E-01 |
| GOTERM_BP_FAT | GO:0051651~maintenance of location in cell                                          | 15  | 0,3 | 7,41E-02 | 1,00E+00 | 4,41E-01 |
| GOTERM_BP_FAT | GO:0070302~regulation of stress-activated protein kinase signaling pathway          | 14  | 0,3 | 7,45E-02 | 1,00E+00 | 4,42E-01 |
| GOTERM_BP_FAT | GO:0046328~regulation of JNK cascade                                                | 14  | 0,3 | 7,45E-02 | 1,00E+00 | 4,42E-01 |
| GOTERM_BP_FAT | GO:0034654~nucleobase, nucleoside, nucleotide and nucleic acid biosynthetic process | 53  | 1,2 | 7,51E-02 | 1,00E+00 | 4,44E-01 |
| GOTERM_BP_FAT | GO:0034404~nucleobase, nucleoside and nucleotide biosynthetic process               | 53  | 1,2 | 7,51E-02 | 1,00E+00 | 4,44E-01 |
| GOTERM_BP_FAT | GO:0009141~nucleoside triphosphate metabolic process                                | 32  | 0,7 | 7,72E-02 | 1,00E+00 | 4,52E-01 |
| GOTERM_BP_FAT | GO:0007049~cell cycle                                                               | 186 | 4,2 | 7,75E-02 | 1,00E+00 | 4,53E-01 |
| GOTERM_BP_FAT | GO:0007281~germ cell development                                                    | 78  | 1,8 | 7,99E-02 | 1,00E+00 | 4,63E-01 |
| GOTERM_BP_FAT | GO:0045995~regulation of embryonic development                                      | 21  | 0,5 | 8,00E-02 | 1,00E+00 | 4,62E-01 |
| GOTERM_BP_FAT | GO:0017038~protein import                                                           | 26  | 0,6 | 8,12E-02 | 1,00E+00 | 4,67E-01 |
| GOTERM_BP_FAT | GO:0034613~cellular protein localization                                            | 59  | 1,3 | 8,18E-02 | 1,00E+00 | 4,68E-01 |
| GOTERM_BP_FAT | GO:0002168~instar larval development                                                | 19  | 0,4 | 8,42E-02 | 1,00E+00 | 4,77E-01 |
| GOTERM_BP_FAT | GO:0000910~cytokinesis                                                              | 29  | 0,7 | 8,51E-02 | 1,00E+00 | 4,80E-01 |
| GOTERM_BP_FAT | GO:0043473~pigmentation                                                             | 24  | 0,5 | 8,63E-02 | 1,00E+00 | 4,85E-01 |
| GOTERM_BP_FAT | GO:0043085~positive regulation of catalytic activity                                | 24  | 0,5 | 8,63E-02 | 1,00E+00 | 4,85E-01 |
| GOTERM_BP_FAT | GO:0006952~defense response                                                         | 57  | 1,3 | 8,73E-02 | 1,00E+00 | 4,88E-01 |
| GOTERM_BP_FAT | GO:0015837~amine transport                                                          | 17  | 0,4 | 8,81E-02 | 1,00E+00 | 4,90E-01 |
| GOTERM_BP_FAT | GO:0006909~phagocytosis                                                             | 64  | 1,4 | 9,02E-02 | 1,00E+00 | 4,98E-01 |
| GOTERM_BP_FAT | GO:0009628~response to abiotic stimulus                                             | 69  | 1,6 | 9,05E-02 | 1,00E+00 | 4,98E-01 |
| GOTERM_BP_FAT | GO:0010004~gastrulation involving germ band extension                               | 15  | 0,3 | 9,17E-02 | 1,00E+00 | 5,02E-01 |
| GOTERM_BP_FAT | GO:0001703~gastrulation with mouth forming first                                    | 15  | 0,3 | 9,17E-02 | 1,00E+00 | 5,02E-01 |
| GOTERM_BP_FAT | GO:0046843~dorsal appendage formation                                               | 15  | 0,3 | 9,17E-02 | 1,00E+00 | 5,02E-01 |
| GOTERM_BP_FAT | GO:0080135~regulation of cellular response to stress                                | 14  | 0,3 | 9,31E-02 | 1,00E+00 | 5,07E-01 |
| GOTERM_BP_FAT | GO:0016050~vesicle organization                                                     | 14  | 0,3 | 9,31E-02 | 1,00E+00 | 5,07E-01 |
| GOTERM_BP_FAT | GO:0032507~maintenance of protein location in cell                                  | 14  | 0,3 | 9,31E-02 | 1,00E+00 | 5,07E-01 |
| GOTERM_BP_FAT | GO:0010975~regulation of neuron projection development                              | 13  | 0,3 | 9,43E-02 | 1,00E+00 | 5,11E-01 |
| GOTERM_BP_FAT | GO:0010769~regulation of cell morphogenesis involved in differentiation             | 13  | 0,3 | 9,43E-02 | 1,00E+00 | 5,11E-01 |
| GOTERM_BP_FAT | GO:0051647~nucleus localization                                                     | 13  | 0,3 | 9,43E-02 | 1,00E+00 | 5,11E-01 |
| GOTERM_BP_FAT | GO:0009156~ribonucleoside monophosphate biosynthetic process                        | 10  | 0,2 | 9,44E-02 | 1,00E+00 | 5,10E-01 |
| GOTERM_BP_FAT | GO:0006916~anti-apoptosis                                                           | 10  | 0,2 | 9,44E-02 | 1,00E+00 | 5,10E-01 |
| GOTERM_BP_FAT | GO:0009161~ribonucleoside monophosphate metabolic process                           | 10  | 0,2 | 9,44E-02 | 1,00E+00 | 5,10E-01 |
| GOTERM_BP_FAT | GO:0016571~histone methylation                                                      | 10  | 0,2 | 9,44E-02 | 1,00E+00 | 5,10E-01 |
| GOTERM_BP_FAT | GO:0030071~regulation of mitotic metaphase/anaphase transition                      | 10  | 0,2 | 9,44E-02 | 1,00E+00 | 5,10E-01 |
| GOTERM_BP_FAT | GO:0009798~axis specification                                                       | 65  | 1,5 | 9,49E-02 | 1,00E+00 | 5,11E-01 |
| GOTERM_BP_FAT | GO:0045475~locomotor rhythm                                                         | 12  | 0,3 | 9,50E-02 | 1,00E+00 | 5,11E-01 |
| GOTERM_BP_FAT | GO:0019731~antibacterial humoral response                                           | 12  | 0,3 | 9,50E-02 | 1,00E+00 | 5,11E-01 |
| GOTERM_BP_FAT | GO:0007443~Malpighian tubule morphogenesis                                          | 12  | 0,3 | 9,50E-02 | 1,00E+00 | 5,11E-01 |
| GOTERM_BP_FAT | GO:0006886~intracellular protein transport                                          | 57  | 1,3 | 9,54E-02 | 1,00E+00 | 5,12E-01 |
| GOTERM_BP_FAT | GO:0060341~regulation of cellular localization                                      | 25  | 0,6 | 9,70E-02 | 1,00E+00 | 5,17E-01 |
| GOTERM_CC_FAT | GO:0015630~microtubule cytoskeleton                                                 | 123 | 2,8 | 2,32E-18 | 1,32E-15 | 1,32E-15 |
| GOTERM_CC_FAT | GO:0005856~cytoskeleton                                                             | 166 | 3,7 | 5,17E-15 | 2,97E-12 | 1,49E-12 |

|               |                                                                                     |     |      |          |          |          |
|---------------|-------------------------------------------------------------------------------------|-----|------|----------|----------|----------|
| GOTERM_CC_FAT | GO:0005886~plasma membrane                                                          | 312 | 7,0  | 1,00E-14 | 5,70E-12 | 1,90E-12 |
| GOTERM_CC_FAT | GO:0044430~cytoskeletal part                                                        | 138 | 3,1  | 3,23E-13 | 1,84E-10 | 4,60E-11 |
| GOTERM_CC_FAT | GO:0044459~plasma membrane part                                                     | 175 | 3,9  | 1,93E-11 | 1,10E-08 | 2,20E-09 |
| GOTERM_CC_FAT | GO:0005815~microtubule organizing center                                            | 42  | 0,9  | 9,65E-11 | 5,50E-08 | 9,16E-09 |
| GOTERM_CC_FAT | GO:000502~proteasome complex                                                        | 40  | 0,9  | 1,27E-09 | 7,24E-07 | 1,03E-07 |
| GOTERM_CC_FAT | GO:0005911~cell-cell junction                                                       | 38  | 0,9  | 3,47E-09 | 1,98E-06 | 2,47E-07 |
| GOTERM_CC_FAT | GO:0005875~microtubule associated complex                                           | 63  | 1,4  | 3,88E-09 | 2,21E-06 | 2,46E-07 |
| GOTERM_CC_FAT | GO:0005813~centrosome                                                               | 36  | 0,8  | 4,40E-09 | 2,51E-06 | 2,51E-07 |
| GOTERM_CC_FAT | GO:0045179~apical cortex                                                            | 20  | 0,5  | 1,98E-08 | 1,13E-05 | 1,03E-06 |
| GOTERM_CC_FAT | GO:0005838~proteasome regulatory particle                                           | 21  | 0,5  | 2,80E-08 | 1,60E-05 | 1,33E-06 |
| GOTERM_CC_FAT | GO:0045177~apical part of cell                                                      | 33  | 0,7  | 2,94E-08 | 1,67E-05 | 1,29E-06 |
| GOTERM_CC_FAT | GO:0022624~proteasome accessory complex                                             | 21  | 0,5  | 1,03E-07 | 5,87E-05 | 4,19E-06 |
| GOTERM_CC_FAT | GO:0016327~apicolateral plasma membrane                                             | 29  | 0,7  | 1,81E-06 | 1,03E-03 | 6,88E-05 |
| GOTERM_CC_FAT | GO:0030054~cell junction                                                            | 64  | 1,4  | 2,04E-06 | 1,16E-03 | 7,27E-05 |
| GOTERM_CC_FAT | GO:0043296~apical junction complex                                                  | 27  | 0,6  | 2,54E-06 | 1,45E-03 | 8,51E-05 |
| GOTERM_CC_FAT | GO:0005938~cell cortex                                                              | 41  | 0,9  | 3,38E-06 | 1,93E-03 | 1,07E-04 |
| GOTERM_CC_FAT | GO:0005819~spindle                                                                  | 38  | 0,9  | 4,23E-06 | 2,41E-03 | 1,27E-04 |
| GOTERM_CC_FAT | GO:0044448~cell cortex part                                                         | 28  | 0,6  | 1,33E-05 | 7,56E-03 | 3,79E-04 |
| GOTERM_CC_FAT | GO:0005887~integral to plasma membrane                                              | 84  | 1,9  | 1,59E-05 | 9,00E-03 | 4,31E-04 |
| GOTERM_CC_FAT | GO:0031226~intrinsic to plasma membrane                                             | 85  | 1,9  | 1,62E-05 | 9,19E-03 | 4,20E-04 |
| GOTERM_CC_FAT | GO:0005694~chromosome                                                               | 119 | 2,7  | 2,27E-05 | 1,29E-02 | 5,62E-04 |
| GOTERM_CC_FAT | GO:0008540~proteasome regulatory particle, base subcomplex                          | 11  | 0,2  | 2,53E-05 | 1,43E-02 | 6,01E-04 |
| GOTERM_CC_FAT | GO:0044427~chromosomal part                                                         | 98  | 2,2  | 3,47E-05 | 1,96E-02 | 7,91E-04 |
| GOTERM_CC_FAT | GO:0005912~adherens junction                                                        | 27  | 0,6  | 7,88E-05 | 4,39E-02 | 1,73E-03 |
| GOTERM_CC_FAT | GO:0005770~late endosome                                                            | 11  | 0,2  | 1,13E-04 | 6,26E-02 | 2,39E-03 |
| GOTERM_CC_FAT | GO:0070161~anchoring junction                                                       | 27  | 0,6  | 1,26E-04 | 6,95E-02 | 2,57E-03 |
| GOTERM_CC_FAT | GO:0005871~kinesin complex                                                          | 19  | 0,4  | 2,58E-04 | 1,37E-01 | 5,05E-03 |
| GOTERM_CC_FAT | GO:0005874~microtubule                                                              | 44  | 1,0  | 3,33E-04 | 1,73E-01 | 6,31E-03 |
| GOTERM_CC_FAT | GO:0000785~chromatin                                                                | 50  | 1,1  | 3,40E-04 | 1,76E-01 | 6,24E-03 |
| GOTERM_CC_FAT | GO:0005913~cell-cell adherens junction                                              | 11  | 0,2  | 3,67E-04 | 1,89E-01 | 6,51E-03 |
| GOTERM_CC_FAT | GO:0030286~dynein complex                                                           | 24  | 0,5  | 3,94E-04 | 2,01E-01 | 6,79E-03 |
| GOTERM_CC_FAT | GO:0042995~cell projection                                                          | 49  | 1,1  | 4,21E-04 | 2,14E-01 | 7,04E-03 |
| GOTERM_CC_FAT | GO:0044450~microtubule organizing center part                                       | 15  | 0,3  | 5,49E-04 | 2,69E-01 | 8,90E-03 |
| GOTERM_CC_FAT | GO:0043005~neuron projection                                                        | 24  | 0,5  | 6,08E-04 | 2,93E-01 | 9,59E-03 |
| GOTERM_CC_FAT | GO:0000775~chromosome, centromeric region                                           | 26  | 0,6  | 8,45E-04 | 3,82E-01 | 1,29E-02 |
| GOTERM_CC_FAT | GO:0031224~intrinsic to membrane                                                    | 434 | 9,8  | 1,21E-03 | 4,99E-01 | 1,80E-02 |
| GOTERM_CC_FAT | GO:0005918~septate junction                                                         | 14  | 0,3  | 1,27E-03 | 5,14E-01 | 1,84E-02 |
| GOTERM_CC_FAT | GO:0070160~occluding junction                                                       | 16  | 0,4  | 1,49E-03 | 5,73E-01 | 2,10E-02 |
| GOTERM_CC_FAT | GO:0031461~cullin-RING ubiquitin ligase complex                                     | 13  | 0,3  | 1,53E-03 | 5,82E-01 | 2,11E-02 |
| GOTERM_CC_FAT | GO:0009986~cell surface                                                             | 11  | 0,2  | 2,15E-03 | 7,07E-01 | 2,88E-02 |
| GOTERM_CC_FAT | GO:0000151~ubiquitin ligase complex                                                 | 21  | 0,5  | 2,75E-03 | 7,92E-01 | 3,58E-02 |
| GOTERM_CC_FAT | GO:0044463~cell projection part                                                     | 24  | 0,5  | 2,77E-03 | 7,94E-01 | 3,52E-02 |
| GOTERM_CC_FAT | GO:0031225~anchored to membrane                                                     | 12  | 0,3  | 3,51E-03 | 8,65E-01 | 4,36E-02 |
| GOTERM_CC_FAT | GO:0016324~apical plasma membrane                                                   | 14  | 0,3  | 3,95E-03 | 8,95E-01 | 4,78E-02 |
| GOTERM_CC_FAT | GO:0005768~endosome                                                                 | 17  | 0,4  | 4,82E-03 | 9,36E-01 | 5,69E-02 |
| GOTERM_CC_FAT | GO:0030424~axon                                                                     | 15  | 0,3  | 5,05E-03 | 9,44E-01 | 5,84E-02 |
| GOTERM_CC_FAT | GO:0016021~integral to membrane                                                     | 421 | 9,5  | 5,14E-03 | 9,47E-01 | 5,82E-02 |
| GOTERM_CC_FAT | GO:0005700~polytene chromosome                                                      | 37  | 0,8  | 1,44E-02 | 1,00E+00 | 1,53E-01 |
| GOTERM_CC_FAT | GO:0043232~intracellular non-membrane-bounded organelle                             | 294 | 6,6  | 1,61E-02 | 1,00E+00 | 1,66E-01 |
| GOTERM_CC_FAT | GO:0043228~non-membrane-bounded organelle                                           | 294 | 6,6  | 1,61E-02 | 1,00E+00 | 1,66E-01 |
| GOTERM_CC_FAT | GO:0030425~dendrite                                                                 | 12  | 0,3  | 1,63E-02 | 1,00E+00 | 1,65E-01 |
| GOTERM_CC_FAT | GO:0000776~kinetochore                                                              | 15  | 0,3  | 1,68E-02 | 1,00E+00 | 1,66E-01 |
| GOTERM_CC_FAT | GO:0000793~condensed chromosome                                                     | 16  | 0,4  | 1,84E-02 | 1,00E+00 | 1,78E-01 |
| GOTERM_CC_FAT | GO:0008287~protein serine/threonine phosphatase complex                             | 14  | 0,3  | 2,15E-02 | 1,00E+00 | 2,01E-01 |
| GOTERM_CC_FAT | GO:0044421~extracellular region part                                                | 55  | 1,2  | 2,40E-02 | 1,00E+00 | 2,19E-01 |
| GOTERM_CC_FAT | GO:0019897~extrinsic to plasma membrane                                             | 17  | 0,4  | 2,67E-02 | 1,00E+00 | 2,37E-01 |
| GOTERM_CC_FAT | GO:0005839~proteasome core complex                                                  | 13  | 0,3  | 2,75E-02 | 1,00E+00 | 2,40E-01 |
| GOTERM_CC_FAT | GO:0000922~spindle pole                                                             | 12  | 0,3  | 3,53E-02 | 1,00E+00 | 2,93E-01 |
| GOTERM_CC_FAT | GO:003179~proton-transporting V-type ATPase, V0 domain                              | 10  | 0,2  | 4,08E-02 | 1,00E+00 | 3,27E-01 |
| GOTERM_CC_FAT | GO:0005667~transcription factor complex                                             | 31  | 0,7  | 4,34E-02 | 1,00E+00 | 3,40E-01 |
| GOTERM_CC_FAT | GO:0031012~extracellular matrix                                                     | 22  | 0,5  | 4,70E-02 | 1,00E+00 | 3,58E-01 |
| GOTERM_CC_FAT | GO:0045202~synapse                                                                  | 44  | 1,0  | 7,35E-02 | 1,00E+00 | 4,99E-01 |
| GOTERM_CC_FAT | GO:0000792~heterochromatin                                                          | 10  | 0,2  | 8,08E-02 | 1,00E+00 | 5,28E-01 |
| GOTERM_CC_FAT | GO:0005578~proteinaceous extracellular matrix                                       | 20  | 0,5  | 8,45E-02 | 1,00E+00 | 5,39E-01 |
| GOTERM_CC_FAT | GO:003177~proton-transporting two-sector ATPase complex, proton-transporting domain | 14  | 0,3  | 8,80E-02 | 1,00E+00 | 5,49E-01 |
| GOTERM_MF_FAT | GO:0030528~transcription regulator activity                                         | 301 | 6,8  | 2,69E-16 | 2,72E-13 | 2,72E-13 |
| GOTERM_MF_FAT | GO:0003700~transcription factor activity                                            | 192 | 4,3  | 3,11E-16 | 4,09E-13 | 2,04E-13 |
| GOTERM_MF_FAT | GO:0003677~DNA binding                                                              | 346 | 7,8  | 3,40E-14 | 4,17E-11 | 1,39E-11 |
| GOTERM_MF_FAT | GO:0003702~RNA polymerase II transcription factor activity                          | 134 | 3,0  | 9,30E-14 | 1,14E-10 | 2,85E-11 |
| GOTERM_MF_FAT | GO:0043565~sequence-specific DNA binding                                            | 122 | 2,7  | 2,81E-13 | 3,45E-10 | 6,90E-11 |
| GOTERM_MF_FAT | GO:0008270~zinc ion binding                                                         | 402 | 9,1  | 1,21E-11 | 1,48E-08 | 2,47E-09 |
| GOTERM_MF_FAT | GO:0003704~specific RNA polymerase II transcription factor activity                 | 50  | 1,1  | 8,60E-10 | 1,06E-06 | 1,51E-07 |
| GOTERM_MF_FAT | GO:0016881~acid-amino acid ligase activity                                          | 64  | 1,4  | 1,29E-08 | 1,58E-05 | 1,98E-06 |
| GOTERM_MF_FAT | GO:0004842~ubiquitin-protein ligase activity                                        | 50  | 1,1  | 3,13E-08 | 3,85E-05 | 4,27E-06 |
| GOTERM_MF_FAT | GO:0019787~small conjugating protein ligase activity                                | 52  | 1,2  | 6,44E-08 | 7,90E-05 | 7,90E-06 |
| GOTERM_MF_FAT | GO:0046872~metal ion binding                                                        | 605 | 13,6 | 7,61E-08 | 9,33E-05 | 8,49E-06 |
| GOTERM_MF_FAT | GO:0016564~transcription repressor activity                                         | 60  | 1,4  | 1,01E-07 | 1,24E-04 | 1,03E-05 |
| GOTERM_MF_FAT | GO:0043167~ion binding                                                              | 620 | 14,0 | 1,48E-07 | 1,81E-04 | 1,40E-05 |
| GOTERM_MF_FAT | GO:0043169~cation binding                                                           | 616 | 13,9 | 2,34E-07 | 2,87E-04 | 2,05E-05 |
| GOTERM_MF_FAT | GO:0008092~cytoskeletal protein binding                                             | 101 | 2,3  | 3,62E-07 | 4,44E-04 | 2,96E-05 |
| GOTERM_MF_FAT | GO:0004672~protein kinase activity                                                  | 121 | 2,7  | 4,02E-06 | 4,92E-03 | 3,08E-04 |
| GOTERM_MF_FAT | GO:0016879~ligase activity, forming carbon-nitrogen bonds                           | 68  | 1,5  | 5,27E-06 | 6,45E-03 | 3,81E-04 |
| GOTERM_MF_FAT | GO:0046914~transition metal ion binding                                             | 474 | 10,7 | 7,77E-06 | 9,49E-03 | 5,29E-04 |
| GOTERM_MF_FAT | GO:0004713~protein tyrosine kinase activity                                         | 36  | 0,8  | 1,90E-05 | 2,30E-02 | 1,22E-03 |
| GOTERM_MF_FAT | GO:0015631~tubulin binding                                                          | 38  | 0,9  | 2,07E-05 | 2,51E-02 | 1,27E-03 |
| GOTERM_MF_FAT | GO:0008017~microtubule binding                                                      | 35  | 0,8  | 5,57E-05 | 6,61E-02 | 3,25E-03 |
| GOTERM_MF_FAT | GO:0004674~protein serine/threonine kinase activity                                 | 86  | 1,9  | 1,70E-04 | 1,88E-01 | 9,42E-03 |
| GOTERM_MF_FAT | GO:0004721~phosphoprotein phosphatase activity                                      | 46  | 1,0  | 3,25E-04 | 3,29E-01 | 1,72E-02 |
| GOTERM_MF_FAT | GO:0004714~transmembrane receptor protein tyrosine kinase activity                  | 16  | 0,4  | 4,90E-04 | 4,52E-01 | 2,47E-02 |
| GOTERM_MF_FAT | GO:0019899~enzyme binding                                                           | 33  | 0,7  | 1,13E-03 | 7,49E-01 | 5,39E-02 |
| GOTERM_MF_FAT | GO:0035091~phosphoinositide binding                                                 | 15  | 0,3  | 2,02E-03 | 9,16E-01 | 9,09E-02 |
| GOTERM_MF_FAT | GO:0003777~microtubule motor activity                                               | 28  | 0,6  | 2,96E-03 | 9,74E-01 | 1,26E-01 |
| GOTERM_MF_FAT | GO:0016566~specific transcriptional repressor activity                              | 20  | 0,5  | 3,41E-03 | 9,85E-01 | 1,39E-01 |
| GOTERM_MF_FAT | GO:0016563~transcription activator activity                                         | 41  | 0,9  | 4,89E-03 | 9,98E-01 | 1,87E-01 |
| GOTERM_MF_FAT | GO:0004725~protein tyrosine phosphatase activity                                    | 23  | 0,5  | 5,69E-03 | 9,99E-01 | 2,08E-01 |

|               |                                                                    |     |     |          |          |          |
|---------------|--------------------------------------------------------------------|-----|-----|----------|----------|----------|
| GOTERM_MF_FAT | GO:0004722~protein serine/threonine phosphatase activity           | 23  | 0,5 | 5,69E-03 | 9,99E-01 | 2,08E-01 |
| GOTERM_MF_FAT | GO:0030695~GTPase regulator activity                               | 58  | 1,3 | 5,72E-03 | 9,99E-01 | 2,03E-01 |
| GOTERM_MF_FAT | GO:0042802~identical protein binding                               | 59  | 1,3 | 5,83E-03 | 9,99E-01 | 2,01E-01 |
| GOTERM_MF_FAT | GO:0004879~ligand-dependent nuclear receptor activity              | 14  | 0,3 | 7,04E-03 | 1,00E+00 | 2,31E-01 |
| GOTERM_MF_FAT | GO:0060589~nucleoside-triphosphatase regulator activity            | 58  | 1,3 | 9,45E-03 | 1,00E+00 | 2,90E-01 |
| GOTERM_MF_FAT | GO:0003774~motor activity                                          | 38  | 0,9 | 1,02E-02 | 1,00E+00 | 3,02E-01 |
| GOTERM_MF_FAT | GO:0050839~cell adhesion molecule binding                          | 12  | 0,3 | 1,03E-02 | 1,00E+00 | 2,97E-01 |
| GOTERM_MF_FAT | GO:0003682~chromatin binding                                       | 29  | 0,7 | 1,30E-02 | 1,00E+00 | 3,52E-01 |
| GOTERM_MF_FAT | GO:0005096~GTPase activator activity                               | 32  | 0,7 | 1,51E-02 | 1,00E+00 | 3,89E-01 |
| GOTERM_MF_FAT | GO:0005083~small GTPase regulator activity                         | 44  | 1,0 | 1,75E-02 | 1,00E+00 | 4,26E-01 |
| GOTERM_MF_FAT | GO:0016791~phosphatase activity                                    | 69  | 1,6 | 1,80E-02 | 1,00E+00 | 4,27E-01 |
| GOTERM_MF_FAT | GO:0008047~enzyme activator activity                               | 38  | 0,9 | 1,85E-02 | 1,00E+00 | 4,28E-01 |
| GOTERM_MF_FAT | GO:0019904~protein domain specific binding                         | 15  | 0,3 | 2,02E-02 | 1,00E+00 | 4,50E-01 |
| GOTERM_MF_FAT | GO:0046982~protein heterodimerization activity                     | 22  | 0,5 | 2,27E-02 | 1,00E+00 | 4,80E-01 |
| GOTERM_MF_FAT | GO:0003727~single-stranded RNA binding                             | 12  | 0,3 | 2,59E-02 | 1,00E+00 | 5,19E-01 |
| GOTERM_MF_FAT | GO:0005509~calcium ion binding                                     | 87  | 2,0 | 3,30E-02 | 1,00E+00 | 5,99E-01 |
| GOTERM_MF_FAT | GO:0030145~manganese ion binding                                   | 25  | 0,6 | 3,37E-02 | 1,00E+00 | 5,99E-01 |
| GOTERM_MF_FAT | GO:0051020~GTPase binding                                          | 14  | 0,3 | 3,52E-02 | 1,00E+00 | 6,07E-01 |
| GOTERM_MF_FAT | GO:0003779~actin binding                                           | 47  | 1,1 | 3,90E-02 | 1,00E+00 | 6,38E-01 |
| GOTERM_MF_FAT | GO:0004298~threonine-type endopeptidase activity                   | 13  | 0,3 | 4,34E-02 | 1,00E+00 | 6,71E-01 |
| GOTERM_MF_FAT | GO:0070003~threonine-type peptidase activity                       | 13  | 0,3 | 4,34E-02 | 1,00E+00 | 6,71E-01 |
| GOTERM_MF_FAT | GO:0008234~cysteine-type peptidase activity                        | 27  | 0,6 | 5,30E-02 | 1,00E+00 | 7,37E-01 |
| GOTERM_MF_FAT | GO:0017022~myosin binding                                          | 12  | 0,3 | 5,37E-02 | 1,00E+00 | 7,35E-01 |
| GOTERM_MF_FAT | GO:0008134~transcription factor binding                            | 35  | 0,8 | 5,77E-02 | 1,00E+00 | 7,54E-01 |
| GOTERM_MF_FAT | GO:0003729~mRNA binding                                            | 67  | 1,5 | 5,77E-02 | 1,00E+00 | 7,47E-01 |
| GOTERM_MF_FAT | GO:0004221~ubiquitin thiolesterase activity                        | 14  | 0,3 | 6,40E-02 | 1,00E+00 | 7,78E-01 |
| GOTERM_MF_FAT | GO:0005099~Ras GTPase activator activity                           | 20  | 0,5 | 6,64E-02 | 1,00E+00 | 7,84E-01 |
| GOTERM_MF_FAT | GO:0008138~protein tyrosine/serine/threonine phosphatase activity  | 11  | 0,2 | 6,66E-02 | 1,00E+00 | 7,79E-01 |
| GOTERM_MF_FAT | GO:0003714~transcription corepressor activity                      | 11  | 0,2 | 6,66E-02 | 1,00E+00 | 7,79E-01 |
| GOTERM_MF_FAT | GO:0031267~small GTPase binding                                    | 12  | 0,3 | 7,31E-02 | 1,00E+00 | 8,05E-01 |
| GOTERM_MF_FAT | GO:0017016~Ras GTPase binding                                      | 12  | 0,3 | 7,31E-02 | 1,00E+00 | 8,05E-01 |
| GOTERM_MF_FAT | GO:0000166~nucleotide binding                                      | 384 | 8,7 | 7,38E-02 | 1,00E+00 | 8,03E-01 |
| GOTERM_MF_FAT | GO:0042624~ATPase activity, uncoupled                              | 68  | 1,5 | 7,68E-02 | 1,00E+00 | 8,10E-01 |
| GOTERM_MF_FAT | GO:0005543~phospholipid binding                                    | 19  | 0,4 | 7,93E-02 | 1,00E+00 | 8,16E-01 |
| GOTERM_MF_FAT | GO:0003707~steroid hormone receptor activity                       | 10  | 0,2 | 8,28E-02 | 1,00E+00 | 8,24E-01 |
| GOTERM_MF_FAT | GO:0008083~growth factor activity                                  | 14  | 0,3 | 8,30E-02 | 1,00E+00 | 8,20E-01 |
| GOTERM_MF_FAT | GO:0016251~general RNA polymerase II transcription factor activity | 34  | 0,8 | 8,84E-02 | 1,00E+00 | 8,35E-01 |
| GOTERM_MF_FAT | GO:0008374~O-acyltransferase activity                              | 11  | 0,2 | 9,03E-02 | 1,00E+00 | 8,37E-01 |
| GOTERM_MF_FAT | GO:0015171~amino acid transmembrane transporter activity           | 20  | 0,5 | 9,80E-02 | 1,00E+00 | 8,57E-01 |

Taf10 - Activation

| Category      | Term                                                                                | Number of affected genes | percentage | PValue   | Bonferroni | Benjamini |
|---------------|-------------------------------------------------------------------------------------|--------------------------|------------|----------|------------|-----------|
| GOTERM_BP_FAT | GO:0055114~oxidation reduction                                                      | 181                      | 9,3        | 3,00E-33 | 5,41E-30   | 5,41E-30  |
| GOTERM_BP_FAT | GO:0005976~polysaccharide metabolic process                                         | 71                       | 3,6        | 8,04E-26 | 1,45E-22   | 7,25E-23  |
| GOTERM_BP_FAT | GO:0006022~aminoglycan metabolic process                                            | 67                       | 3,4        | 6,90E-25 | 1,25E-21   | 4,15E-22  |
| GOTERM_BP_FAT | GO:0006030~chitin metabolic process                                                 | 59                       | 3,0        | 1,56E-24 | 2,81E-21   | 7,02E-22  |
| GOTERM_BP_FAT | GO:0006508~proteolysis                                                              | 166                      | 8,5        | 1,24E-17 | 2,24E-14   | 4,48E-15  |
| GOTERM_BP_FAT | GO:0006952~defense response                                                         | 54                       | 2,8        | 3,58E-11 | 6,46E-08   | 1,08E-08  |
| GOTERM_BP_FAT | GO:0045087~innate immune response                                                   | 35                       | 1,8        | 5,24E-10 | 9,45E-07   | 1,35E-07  |
| GOTERM_BP_FAT | GO:0016052~carbohydrate catabolic process                                           | 32                       | 1,6        | 2,26E-09 | 4,08E-06   | 5,09E-07  |
| GOTERM_BP_FAT | GO:0019318~hexose metabolic process                                                 | 32                       | 1,6        | 4,43E-09 | 8,00E-06   | 8,89E-07  |
| GOTERM_BP_FAT | GO:0005996~monosaccharide metabolic process                                         | 34                       | 1,7        | 1,07E-08 | 1,93E-05   | 1,93E-06  |
| GOTERM_BP_FAT | GO:0006955~immune response                                                          | 47                       | 2,4        | 4,52E-08 | 8,16E-05   | 7,42E-06  |
| GOTERM_BP_FAT | GO:0006006~glucose metabolic process                                                | 24                       | 1,2        | 2,19E-07 | 3,96E-04   | 3,30E-05  |
| GOTERM_BP_FAT | GO:0042742~defense response to bacterium                                            | 25                       | 1,3        | 6,84E-07 | 1,23E-03   | 9,50E-05  |
| GOTERM_BP_FAT | GO:0009636~response to toxin                                                        | 14                       | 0,7        | 7,05E-07 | 1,27E-03   | 9,08E-05  |
| GOTERM_BP_FAT | GO:0009617~response to bacterium                                                    | 27                       | 1,4        | 1,06E-06 | 1,92E-03   | 1,28E-04  |
| GOTERM_BP_FAT | GO:0016053~organic acid biosynthetic process                                        | 23                       | 1,2        | 2,50E-06 | 4,49E-03   | 2,81E-04  |
| GOTERM_BP_FAT | GO:0046394~carboxylic acid biosynthetic process                                     | 23                       | 1,2        | 2,50E-06 | 4,49E-03   | 2,81E-04  |
| GOTERM_BP_FAT | GO:0017085~response to insecticide                                                  | 11                       | 0,6        | 1,06E-05 | 1,89E-02   | 1,12E-03  |
| GOTERM_BP_FAT | GO:0044275~cellular carbohydrate catabolic process                                  | 19                       | 1,0        | 1,34E-05 | 2,39E-02   | 1,35E-03  |
| GOTERM_BP_FAT | GO:0046164~alcohol catabolic process                                                | 19                       | 1,0        | 1,34E-05 | 2,39E-02   | 1,35E-03  |
| GOTERM_BP_FAT | GO:0006096~glycolysis                                                               | 15                       | 0,8        | 2,41E-05 | 4,26E-02   | 2,29E-03  |
| GOTERM_BP_FAT | GO:0019731~antibacterial humoral response                                           | 13                       | 0,7        | 2,62E-05 | 4,63E-02   | 2,37E-03  |
| GOTERM_BP_FAT | GO:0000272~polysaccharide catabolic process                                         | 14                       | 0,7        | 5,71E-05 | 9,79E-02   | 4,90E-03  |
| GOTERM_BP_FAT | GO:0006811~ion transport                                                            | 67                       | 3,4        | 7,19E-05 | 1,22E-01   | 5,88E-03  |
| GOTERM_BP_FAT | GO:0019320~hexose catabolic process                                                 | 16                       | 0,8        | 8,19E-05 | 1,37E-01   | 6,40E-03  |
| GOTERM_BP_FAT | GO:0006007~glucose catabolic process                                                | 16                       | 0,8        | 8,19E-05 | 1,37E-01   | 6,40E-03  |
| GOTERM_BP_FAT | GO:0009064~glutamine family amino acid metabolic process                            | 13                       | 0,7        | 9,25E-05 | 1,54E-01   | 6,93E-03  |
| GOTERM_BP_FAT | GO:0006631~fatty acid metabolic process                                             | 18                       | 0,9        | 9,37E-05 | 1,56E-01   | 6,74E-03  |
| GOTERM_BP_FAT | GO:0046365~monosaccharide catabolic process                                         | 16                       | 0,8        | 1,11E-04 | 1,81E-01   | 7,65E-03  |
| GOTERM_BP_FAT | GO:0016042~lipid catabolic process                                                  | 16                       | 0,8        | 1,48E-04 | 2,34E-01   | 9,83E-03  |
| GOTERM_BP_FAT | GO:0006026~aminoglycan catabolic process                                            | 13                       | 0,7        | 1,92E-04 | 2,93E-01   | 1,23E-02  |
| GOTERM_BP_FAT | GO:0006575~cellular amino acid derivative metabolic process                         | 19                       | 1,0        | 1,96E-04 | 2,97E-01   | 1,21E-02  |
| GOTERM_BP_FAT | GO:0019748~secondary metabolic process                                              | 21                       | 1,1        | 2,19E-04 | 3,27E-01   | 1,31E-02  |
| GOTERM_BP_FAT | GO:0050830~defense response to Gram-positive bacterium                              | 11                       | 0,6        | 2,41E-04 | 3,52E-01   | 1,39E-02  |
| GOTERM_BP_FAT | GO:0006959~humoral immune response                                                  | 22                       | 1,1        | 6,18E-04 | 6,73E-01   | 3,43E-02  |
| GOTERM_BP_FAT | GO:0018988~molting cycle, protein-based cuticle                                     | 16                       | 0,8        | 6,82E-04 | 7,08E-01   | 3,66E-02  |
| GOTERM_BP_FAT | GO:0042303~molting cycle                                                            | 16                       | 0,8        | 6,82E-04 | 7,08E-01   | 3,66E-02  |
| GOTERM_BP_FAT | GO:0009309~amine biosynthetic process                                               | 15                       | 0,8        | 8,89E-04 | 7,99E-01   | 4,61E-02  |
| GOTERM_BP_FAT | GO:0007591~molting cycle, chitin-based cuticle                                      | 15                       | 0,8        | 8,89E-04 | 7,99E-01   | 4,61E-02  |
| GOTERM_BP_FAT | GO:0019730~antimicrobial humoral response                                           | 19                       | 1,0        | 1,21E-03 | 8,88E-01   | 6,05E-02  |
| GOTERM_BP_FAT | GO:0044271~nitrogen compound biosynthetic process                                   | 45                       | 2,3        | 1,39E-03 | 9,18E-01   | 6,72E-02  |
| GOTERM_BP_FAT | GO:0008652~cellular amino acid biosynthetic process                                 | 11                       | 0,6        | 1,40E-03 | 9,20E-01   | 6,61E-02  |
| GOTERM_BP_FAT | GO:0042445~hormone metabolic process                                                | 12                       | 0,6        | 1,48E-03 | 9,31E-01   | 6,81E-02  |
| GOTERM_BP_FAT | GO:0010817~regulation of hormone levels                                             | 12                       | 0,6        | 1,48E-03 | 9,31E-01   | 6,81E-02  |
| GOTERM_BP_FAT | GO:0046395~carboxylic acid catabolic process                                        | 14                       | 0,7        | 1,83E-03 | 9,64E-01   | 8,15E-02  |
| GOTERM_BP_FAT | GO:0016054~organic acid catabolic process                                           | 14                       | 0,7        | 1,83E-03 | 9,64E-01   | 8,15E-02  |
| GOTERM_BP_FAT | GO:0006812~cation transport                                                         | 46                       | 2,4        | 3,83E-03 | 9,99E-01   | 1,59E-01  |
| GOTERM_BP_FAT | GO:0055001~muscle cell development                                                  | 13                       | 0,7        | 5,58E-03 | 1,00E+00   | 2,18E-01  |
| GOTERM_BP_FAT | GO:0055002~striated muscle cell development                                         | 13                       | 0,7        | 5,58E-03 | 1,00E+00   | 2,18E-01  |
| GOTERM_BP_FAT | GO:0006816~calcium ion transport                                                    | 10                       | 0,5        | 6,90E-03 | 1,00E+00   | 2,57E-01  |
| GOTERM_BP_FAT | GO:0030001~metal ion transport                                                      | 32                       | 1,6        | 7,19E-03 | 1,00E+00   | 2,61E-01  |
| GOTERM_BP_FAT | GO:0006633~fatty acid biosynthetic process                                          | 10                       | 0,5        | 8,71E-03 | 1,00E+00   | 3,02E-01  |
| GOTERM_BP_FAT | GO:0015674~di-, tri-valent inorganic cation transport                               | 11                       | 0,6        | 1,21E-02 | 1,00E+00   | 3,87E-01  |
| GOTERM_BP_FAT | GO:0009063~cellular amino acid catabolic process                                    | 10                       | 0,5        | 1,34E-02 | 1,00E+00   | 4,11E-01  |
| GOTERM_BP_FAT | GO:0055082~cellular chemical homeostasis                                            | 13                       | 0,7        | 1,57E-02 | 1,00E+00   | 4,55E-01  |
| GOTERM_BP_FAT | GO:0006091~generation of precursor metabolites and energy                           | 38                       | 1,9        | 1,69E-02 | 1,00E+00   | 4,73E-01  |
| GOTERM_BP_FAT | GO:0051146~striated muscle cell differentiation                                     | 15                       | 0,8        | 2,04E-02 | 1,00E+00   | 5,32E-01  |
| GOTERM_BP_FAT | GO:0019637~organophosphate metabolic process                                        | 20                       | 1,0        | 2,07E-02 | 1,00E+00   | 5,30E-01  |
| GOTERM_BP_FAT | GO:0009310~amine catabolic process                                                  | 10                       | 0,5        | 2,35E-02 | 1,00E+00   | 5,69E-01  |
| GOTERM_BP_FAT | GO:0016051~carbohydrate biosynthetic process                                        | 13                       | 0,7        | 3,16E-02 | 1,00E+00   | 6,72E-01  |
| GOTERM_BP_FAT | GO:0006644~phospholipid metabolic process                                           | 17                       | 0,9        | 4,03E-02 | 1,00E+00   | 7,54E-01  |
| GOTERM_BP_FAT | GO:0015672~monovalent inorganic cation transport                                    | 30                       | 1,5        | 4,41E-02 | 1,00E+00   | 7,78E-01  |
| GOTERM_BP_FAT | GO:0014706~striated muscle tissue development                                       | 10                       | 0,5        | 4,43E-02 | 1,00E+00   | 7,74E-01  |
| GOTERM_BP_FAT | GO:0051606~detection of stimulus                                                    | 19                       | 1,0        | 5,06E-02 | 1,00E+00   | 8,13E-01  |
| GOTERM_BP_FAT | GO:0060537~muscle tissue development                                                | 10                       | 0,5        | 5,09E-02 | 1,00E+00   | 8,09E-01  |
| GOTERM_BP_FAT | GO:0009123~nucleoside monophosphate metabolic process                               | 12                       | 0,6        | 5,34E-02 | 1,00E+00   | 8,19E-01  |
| GOTERM_BP_FAT | GO:0042692~muscle cell differentiation                                              | 15                       | 0,8        | 5,54E-02 | 1,00E+00   | 8,25E-01  |
| GOTERM_BP_FAT | GO:0019725~cellular homeostasis                                                     | 20                       | 1,0        | 6,97E-02 | 1,00E+00   | 8,86E-01  |
| GOTERM_BP_FAT | GO:0009124~nucleoside monophosphate biosynthetic process                            | 11                       | 0,6        | 7,08E-02 | 1,00E+00   | 8,86E-01  |
| GOTERM_BP_FAT | GO:0007606~sensory perception of chemical stimulus                                  | 31                       | 1,6        | 8,67E-02 | 1,00E+00   | 9,29E-01  |
| GOTERM_BP_FAT | GO:0034654~nucleobase, nucleoside, nucleotide and nucleic acid biosynthetic process | 26                       | 1,3        | 9,01E-02 | 1,00E+00   | 9,33E-01  |
| GOTERM_BP_FAT | GO:0034404~nucleobase, nucleoside and nucleotide biosynthetic process               | 26                       | 1,3        | 9,01E-02 | 1,00E+00   | 9,33E-01  |
| GOTERM_BP_FAT | GO:0009165~nucleotide biosynthetic process                                          | 25                       | 1,3        | 9,16E-02 | 1,00E+00   | 9,33E-01  |
| GOTERM_BP_FAT | GO:0048878~chemical homeostasis                                                     | 13                       | 0,7        | 9,24E-02 | 1,00E+00   | 9,32E-01  |
| GOTERM_CC_FAT | GO:0005576~extracellular region                                                     | 166                      | 8,5        | 1,09E-35 | 3,00E-33   | 3,00E-33  |
| GOTERM_CC_FAT | GO:0042598~vesicular fraction                                                       | 54                       | 2,8        | 4,04E-26 | 1,11E-23   | 5,56E-24  |
| GOTERM_CC_FAT | GO:0005792~microsome                                                                | 54                       | 2,8        | 4,04E-26 | 1,11E-23   | 5,56E-24  |
| GOTERM_CC_FAT | GO:0005624~membrane fraction                                                        | 54                       | 2,8        | 2,89E-21 | 7,96E-19   | 2,65E-19  |
| GOTERM_CC_FAT | GO:0005626~insoluble fraction                                                       | 54                       | 2,8        | 2,56E-20 | 7,03E-18   | 1,76E-18  |
| GOTERM_CC_FAT | GO:0000267~cell fraction                                                            | 54                       | 2,8        | 1,20E-19 | 3,30E-17   | 6,59E-18  |
| GOTERM_CC_FAT | GO:0019898~extrinsic to membrane                                                    | 59                       | 3,0        | 8,56E-16 | 2,44E-13   | 4,07E-14  |
| GOTERM_CC_FAT | GO:0005615~extracellular space                                                      | 31                       | 1,6        | 2,12E-08 | 5,82E-06   | 8,32E-07  |
| GOTERM_CC_FAT | GO:0005783~endoplasmic reticulum                                                    | 70                       | 3,6        | 2,14E-08 | 5,87E-06   | 7,34E-07  |
| GOTERM_CC_FAT | GO:0043292~contractile fiber                                                        | 14                       | 0,7        | 6,32E-08 | 1,74E-05   | 1,93E-06  |
| GOTERM_CC_FAT | GO:0044449~contractile fiber part                                                   | 12                       | 0,6        | 1,69E-06 | 4,64E-04   | 4,65E-05  |
| GOTERM_CC_FAT | GO:0044421~extracellular region part                                                | 39                       | 2,0        | 1,58E-05 | 4,34E-03   | 3,95E-04  |
| GOTERM_CC_FAT | GO:0030017~sarcomere                                                                | 10                       | 0,5        | 1,95E-05 | 5,34E-03   | 4,46E-04  |
| GOTERM_CC_FAT | GO:0030016~myofibril                                                                | 10                       | 0,5        | 3,95E-05 | 1,08E-02   | 8,36E-04  |
| GOTERM_CC_FAT | GO:0005811~lipid particle                                                           | 53                       | 2,7        | 1,24E-04 | 3,34E-02   | 2,42E-03  |
| GOTERM_CC_FAT | GO:0016021~integral to membrane                                                     | 209                      | 10,7       | 4,07E-04 | 1,06E-01   | 7,43E-03  |
| GOTERM_CC_FAT | GO:0031224~intrinsic to membrane                                                    | 210                      | 10,8       | 7,57E-04 | 1,88E-01   | 1,29E-02  |

|               |                                                                                                          |     |      |          |          |          |
|---------------|----------------------------------------------------------------------------------------------------------|-----|------|----------|----------|----------|
| GOTERM_CC_FAT | GO:005887~integral to plasma membrane                                                                    | 37  | 1,9  | 1,43E-02 | 9,81E-01 | 2,08E-01 |
| GOTERM_CC_FAT | GO:0031226~intrinsic to plasma membrane                                                                  | 37  | 1,9  | 1,78E-02 | 9,93E-01 | 2,41E-01 |
| GOTERM_CC_FAT | GO:0045211~postsynaptic membrane                                                                         | 12  | 0,6  | 2,17E-02 | 9,98E-01 | 2,72E-01 |
| GOTERM_CC_FAT | GO:0005773~vacuole                                                                                       | 14  | 0,7  | 3,03E-02 | 1,00E+00 | 3,45E-01 |
| GOTERM_CC_FAT | GO:0042579~microbody                                                                                     | 10  | 0,5  | 6,67E-02 | 1,00E+00 | 5,95E-01 |
| GOTERM_CC_FAT | GO:0005777~peroxisome                                                                                    | 10  | 0,5  | 6,67E-02 | 1,00E+00 | 5,95E-01 |
| GOTERM_MF_FAT | GO:0030247~polysaccharide binding                                                                        | 62  | 3,2  | 3,43E-20 | 3,04E-17 | 3,04E-17 |
| GOTERM_MF_FAT | GO:0001871~pattern binding                                                                               | 62  | 3,2  | 3,43E-20 | 3,04E-17 | 3,04E-17 |
| GOTERM_MF_FAT | GO:0046906~tetrapyrrole binding                                                                          | 66  | 3,4  | 9,60E-20 | 8,50E-17 | 4,25E-17 |
| GOTERM_MF_FAT | GO:0020037~heme binding                                                                                  | 66  | 3,4  | 9,60E-20 | 8,50E-17 | 4,25E-17 |
| GOTERM_MF_FAT | GO:0005506~iron ion binding                                                                              | 96  | 4,9  | 3,04E-19 | 2,70E-16 | 8,99E-17 |
| GOTERM_MF_FAT | GO:0008061~chitin binding                                                                                | 53  | 2,7  | 9,34E-19 | 8,27E-16 | 2,07E-16 |
| GOTERM_MF_FAT | GO:0009055~electron carrier activity                                                                     | 80  | 4,1  | 3,50E-18 | 3,10E-15 | 6,20E-16 |
| GOTERM_MF_FAT | GO:0008233~peptidase activity                                                                            | 172 | 8,8  | 2,32E-16 | 1,97E-13 | 3,28E-14 |
| GOTERM_MF_FAT | GO:0042302~structural constituent of cuticle                                                             | 55  | 2,8  | 9,07E-16 | 7,87E-13 | 1,12E-13 |
| GOTERM_MF_FAT | GO:0005214~structural constituent of chitin-based cuticle                                                | 52  | 2,7  | 1,19E-15 | 1,08E-12 | 1,35E-13 |
| GOTERM_MF_FAT | GO:0030246~carbohydrate binding                                                                          | 73  | 3,7  | 1,54E-15 | 1,38E-12 | 1,53E-13 |
| GOTERM_MF_FAT | GO:0008236~serine-type peptidase activity                                                                | 98  | 5,0  | 1,41E-14 | 1,25E-11 | 1,25E-12 |
| GOTERM_MF_FAT | GO:0017171~serine hydrolase activity                                                                     | 98  | 5,0  | 2,22E-14 | 1,97E-11 | 1,79E-12 |
| GOTERM_MF_FAT | GO:0070011~peptidase activity, acting on L-amino acid peptides                                           | 158 | 8,1  | 6,40E-14 | 5,67E-11 | 4,72E-12 |
| GOTERM_MF_FAT | GO:0004252~serine-type endopeptidase activity                                                            | 89  | 4,6  | 2,91E-13 | 2,58E-10 | 1,98E-11 |
| GOTERM_MF_FAT | GO:0016490~structural constituent of peritrophic membrane                                                | 19  | 1,0  | 1,37E-11 | 1,21E-08 | 8,67E-10 |
| GOTERM_MF_FAT | GO:0004175~endopeptidase activity                                                                        | 118 | 6,0  | 1,67E-10 | 1,48E-07 | 9,87E-09 |
| GOTERM_MF_FAT | GO:0004091~carboxylesterase activity                                                                     | 43  | 2,2  | 3,04E-10 | 2,69E-07 | 1,68E-08 |
| GOTERM_MF_FAT | GO:0005198~structural molecule activity                                                                  | 111 | 5,7  | 2,29E-08 | 2,03E-05 | 1,19E-06 |
| GOTERM_MF_FAT | GO:0016298~lipase activity                                                                               | 35  | 1,8  | 6,42E-08 | 5,69E-05 | 3,16E-06 |
| GOTERM_MF_FAT | GO:0008010~structural constituent of chitin-based larval cuticle                                         | 20  | 1,0  | 4,47E-07 | 3,96E-04 | 2,09E-05 |
| GOTERM_MF_FAT | GO:0048037~cofactor binding                                                                              | 53  | 2,7  | 1,25E-06 | 1,11E-03 | 5,55E-05 |
| GOTERM_MF_FAT | GO:0004180~carboxypeptidase activity                                                                     | 21  | 1,1  | 1,42E-06 | 1,25E-03 | 5,97E-05 |
| GOTERM_MF_FAT | GO:0004806~triacylglycerol lipase activity                                                               | 19  | 1,0  | 2,44E-06 | 2,16E-03 | 9,83E-05 |
| GOTERM_MF_FAT | GO:0019842~vitamin binding                                                                               | 32  | 1,6  | 1,77E-05 | 1,56E-02 | 6,81E-04 |
| GOTERM_MF_FAT | GO:0008237~metallopeptidase activity                                                                     | 45  | 2,3  | 5,52E-05 | 4,77E-02 | 2,04E-03 |
| GOTERM_MF_FAT | GO:0008238~exopeptidase activity                                                                         | 32  | 1,6  | 7,72E-05 | 6,61E-02 | 2,73E-03 |
| GOTERM_MF_FAT | GO:0004620~phospholipase activity                                                                        | 19  | 1,0  | 7,72E-05 | 6,61E-02 | 2,63E-03 |
| GOTERM_MF_FAT | GO:0016811~hydrolase activity, acting on carbon-nitrogen (but not peptide) bonds, in linear amides       | 22  | 1,1  | 8,65E-05 | 7,38E-02 | 2,83E-03 |
| GOTERM_MF_FAT | GO:0015101~organic cation transmembrane transporter activity                                             | 16  | 0,8  | 1,08E-04 | 9,16E-02 | 3,43E-03 |
| GOTERM_MF_FAT | GO:0004866~endopeptidase inhibitor activity                                                              | 26  | 1,3  | 1,17E-04 | 9,83E-02 | 3,56E-03 |
| GOTERM_MF_FAT | GO:0050662~coenzyme binding                                                                              | 38  | 1,9  | 1,48E-04 | 1,23E-01 | 4,35E-03 |
| GOTERM_MF_FAT | GO:0030414~peptidase inhibitor activity                                                                  | 26  | 1,3  | 2,24E-04 | 1,80E-01 | 6,38E-03 |
| GOTERM_MF_FAT | GO:0004857~enzyme inhibitor activity                                                                     | 30  | 1,5  | 6,37E-04 | 4,31E-01 | 1,75E-02 |
| GOTERM_MF_FAT | GO:0004867~serine-type endopeptidase inhibitor activity                                                  | 21  | 1,1  | 6,85E-04 | 4,55E-01 | 1,82E-02 |
| GOTERM_MF_FAT | GO:0015926~glucosidase activity                                                                          | 10  | 0,5  | 6,89E-04 | 4,57E-01 | 1,78E-02 |
| GOTERM_MF_FAT | GO:0070279~vitamin B6 binding                                                                            | 15  | 0,8  | 7,99E-04 | 5,08E-01 | 2,00E-02 |
| GOTERM_MF_FAT | GO:0030170~pyridoxal phosphate binding                                                                   | 15  | 0,8  | 7,99E-04 | 5,08E-01 | 2,00E-02 |
| GOTERM_MF_FAT | GO:0015370~solute:sodium symporter activity                                                              | 20  | 1,0  | 9,77E-04 | 5,79E-01 | 2,38E-02 |
| GOTERM_MF_FAT | GO:0004181~metallocarboxypeptidase activity                                                              | 11  | 0,6  | 2,46E-03 | 8,87E-01 | 5,73E-02 |
| GOTERM_MF_FAT | GO:0016877~ligase activity, forming carbon-sulfur bonds                                                  | 10  | 0,5  | 3,52E-03 | 9,56E-01 | 7,89E-02 |
| GOTERM_MF_FAT | GO:0015294~solute:cation symporter activity                                                              | 22  | 1,1  | 4,54E-03 | 9,82E-01 | 9,83E-02 |
| GOTERM_MF_FAT | GO:0004364~glutathione transferase activity                                                              | 13  | 0,7  | 4,90E-03 | 9,87E-01 | 1,03E-01 |
| GOTERM_MF_FAT | GO:0005507~copper ion binding                                                                            | 11  | 0,6  | 8,02E-03 | 9,99E-01 | 1,60E-01 |
| GOTERM_MF_FAT | GO:0015293~symporter activity                                                                            | 22  | 1,1  | 8,27E-03 | 9,99E-01 | 1,61E-01 |
| GOTERM_MF_FAT | GO:0015276~ligand-gated ion channel activity                                                             | 19  | 1,0  | 1,03E-02 | 1,00E+00 | 1,92E-01 |
| GOTERM_MF_FAT | GO:0022834~ligand-gated channel activity                                                                 | 19  | 1,0  | 1,03E-02 | 1,00E+00 | 1,92E-01 |
| GOTERM_MF_FAT | GO:0031406~carboxylic acid binding                                                                       | 18  | 0,9  | 1,05E-02 | 1,00E+00 | 1,91E-01 |
| GOTERM_MF_FAT | GO:0050660~FAD binding                                                                                   | 16  | 0,8  | 2,70E-02 | 1,00E+00 | 4,17E-01 |
| GOTERM_MF_FAT | GO:0005275~amine transmembrane transporter activity                                                      | 15  | 0,8  | 3,71E-02 | 1,00E+00 | 5,17E-01 |
| GOTERM_MF_FAT | GO:0016701~oxidoreductase activity, acting on single donors with incorporation of molecular oxygen       | 11  | 0,6  | 4,24E-02 | 1,00E+00 | 5,58E-01 |
| GOTERM_MF_FAT | GO:0022836~gated channel activity                                                                        | 25  | 1,3  | 4,69E-02 | 1,00E+00 | 5,88E-01 |
| GOTERM_MF_FAT | GO:0016765~transferase activity, transferring alkyl or aryl (other than methyl) groups                   | 15  | 0,8  | 4,80E-02 | 1,00E+00 | 5,89E-01 |
| GOTERM_MF_FAT | GO:0051287~NAD or NADH binding                                                                           | 11  | 0,6  | 5,81E-02 | 1,00E+00 | 6,54E-01 |
| GOTERM_MF_FAT | GO:0022838~substrate specific channel activity                                                           | 35  | 1,8  | 6,70E-02 | 1,00E+00 | 7,00E-01 |
| GOTERM_MF_FAT | GO:0005230~extracellular ligand-gated ion channel activity                                               | 13  | 0,7  | 6,89E-02 | 1,00E+00 | 7,04E-01 |
| GOTERM_MF_FAT | GO:0022803~passive transmembrane transporter activity                                                    | 36  | 1,8  | 7,11E-02 | 1,00E+00 | 7,09E-01 |
| GOTERM_MF_FAT | GO:0015267~channel activity                                                                              | 36  | 1,8  | 7,11E-02 | 1,00E+00 | 7,09E-01 |
| GOTERM_MF_FAT | GO:0005216~ion channel activity                                                                          | 34  | 1,7  | 7,17E-02 | 1,00E+00 | 7,05E-01 |
| GOTERM_MF_FAT | GO:0043167~ion binding                                                                                   | 280 | 14,3 | 7,27E-02 | 1,00E+00 | 7,04E-01 |
| GOTERM_MF_FAT | GO:0016702~oxidoreductase activity, acting on single donors with incorporation of molecular oxygen, inco | 10  | 0,5  | 8,13E-02 | 1,00E+00 | 7,39E-01 |
| GOTERM_MF_FAT | GO:0015171~amino acid transmembrane transporter activity                                                 | 12  | 0,6  | 8,28E-02 | 1,00E+00 | 7,39E-01 |
| GOTERM_MF_FAT | GO:0043169~cation binding                                                                                | 278 | 14,2 | 8,46E-02 | 1,00E+00 | 7,41E-01 |
| GOTERM_MF_FAT | GO:0008235~metalloexopeptidase activity                                                                  | 11  | 0,6  | 8,80E-02 | 1,00E+00 | 7,49E-01 |

Ada2a - Activation

| Category      | Term                                                                                | Number of affected genes | percentage | PValue   | Bonferroni | Benjamini |
|---------------|-------------------------------------------------------------------------------------|--------------------------|------------|----------|------------|-----------|
| GOTERM_BP_FAT | GO:0055114~oxidation reduction                                                      | 264                      | 11,0       | 4,07E-68 | 7,92E-65   | 7,92E-65  |
| GOTERM_BP_FAT | GO:006091~generation of precursor metabolites and energy                            | 107                      | 4,5        | 2,82E-33 | 5,49E-30   | 2,74E-30  |
| GOTERM_BP_FAT | GO:0015980~energy derivation by oxidation of organic compounds                      | 65                       | 2,7        | 8,90E-25 | 1,73E-21   | 5,77E-22  |
| GOTERM_BP_FAT | GO:0045333~cellular respiration                                                     | 60                       | 2,5        | 5,85E-23 | 1,14E-19   | 2,85E-20  |
| GOTERM_BP_FAT | GO:0006119~oxidative phosphorylation                                                | 67                       | 2,8        | 8,83E-22 | 1,72E-18   | 3,43E-19  |
| GOTERM_BP_FAT | GO:0006030~chitin metabolic process                                                 | 61                       | 2,5        | 2,27E-21 | 4,42E-18   | 7,37E-19  |
| GOTERM_BP_FAT | GO:0022900~electron transport chain                                                 | 52                       | 2,2        | 3,10E-20 | 6,03E-17   | 8,62E-18  |
| GOTERM_BP_FAT | GO:0005976~polysaccharide metabolic process                                         | 70                       | 2,9        | 1,51E-19 | 2,93E-16   | 3,66E-17  |
| GOTERM_BP_FAT | GO:0022904~respiratory electron transport chain                                     | 45                       | 1,9        | 9,51E-19 | 1,85E-15   | 2,05E-16  |
| GOTERM_BP_FAT | GO:0042775~mitochondrial ATP synthesis coupled electron transport                   | 42                       | 1,8        | 3,35E-18 | 6,52E-15   | 6,52E-16  |
| GOTERM_BP_FAT | GO:0042773~ATP synthesis coupled electron transport                                 | 43                       | 1,8        | 7,70E-18 | 1,50E-14   | 1,36E-15  |
| GOTERM_BP_FAT | GO:0006022~aminoglycan metabolic process                                            | 64                       | 2,7        | 1,60E-17 | 3,12E-14   | 2,60E-15  |
| GOTERM_BP_FAT | GO:0019318~hexose metabolic process                                                 | 39                       | 1,6        | 3,86E-11 | 7,50E-08   | 5,77E-09  |
| GOTERM_BP_FAT | GO:0006120~mitochondrial electron transport, NADH to ubiquinone                     | 23                       | 1,0        | 5,01E-11 | 9,75E-08   | 6,96E-09  |
| GOTERM_BP_FAT | GO:0006508~proteolysis                                                              | 171                      | 7,1        | 2,26E-10 | 4,40E-07   | 2,93E-08  |
| GOTERM_BP_FAT | GO:0005996~monosaccharide metabolic process                                         | 41                       | 1,7        | 2,47E-10 | 4,80E-07   | 3,00E-08  |
| GOTERM_BP_FAT | GO:0006631~fatty acid metabolic process                                             | 28                       | 1,2        | 7,13E-10 | 1,39E-06   | 8,16E-08  |
| GOTERM_BP_FAT | GO:0051186~cofactor metabolic process                                               | 41                       | 1,7        | 5,56E-09 | 1,08E-05   | 6,00E-07  |
| GOTERM_BP_FAT | GO:0006811~ion transport                                                            | 92                       | 3,8        | 1,30E-08 | 2,53E-05   | 1,33E-06  |
| GOTERM_BP_FAT | GO:0046394~carboxylic acid biosynthetic process                                     | 29                       | 1,2        | 2,63E-08 | 5,11E-05   | 2,55E-06  |
| GOTERM_BP_FAT | GO:0016053~organic acid biosynthetic process                                        | 29                       | 1,2        | 2,63E-08 | 5,11E-05   | 2,55E-06  |
| GOTERM_BP_FAT | GO:0006633~fatty acid biosynthetic process                                          | 19                       | 0,8        | 3,52E-08 | 6,85E-05   | 3,26E-06  |
| GOTERM_BP_FAT | GO:0006732~coenzyme metabolic process                                               | 35                       | 1,5        | 3,92E-08 | 7,62E-05   | 3,46E-06  |
| GOTERM_BP_FAT | GO:0015672~monovalent inorganic cation transport                                    | 54                       | 2,3        | 1,34E-07 | 2,61E-04   | 1,13E-05  |
| GOTERM_BP_FAT | GO:0006006~glucose metabolic process                                                | 27                       | 1,1        | 1,57E-07 | 3,05E-04   | 1,27E-05  |
| GOTERM_BP_FAT | GO:0006818~hydrogen transport                                                       | 27                       | 1,1        | 4,93E-07 | 9,58E-04   | 3,83E-05  |
| GOTERM_BP_FAT | GO:0006812~cation transport                                                         | 68                       | 2,8        | 7,46E-07 | 1,45E-03   | 5,58E-05  |
| GOTERM_BP_FAT | GO:0015992~proton transport                                                         | 26                       | 1,1        | 1,38E-06 | 2,67E-03   | 9,91E-05  |
| GOTERM_BP_FAT | GO:0044271~nitrogen compound biosynthetic process                                   | 63                       | 2,6        | 1,88E-06 | 3,65E-03   | 1,31E-04  |
| GOTERM_BP_FAT | GO:0006084~acetyl-CoA metabolic process                                             | 18                       | 0,8        | 2,51E-06 | 4,88E-03   | 1,69E-04  |
| GOTERM_BP_FAT | GO:0044275~cellular carbohydrate catabolic process                                  | 22                       | 0,9        | 4,78E-06 | 9,26E-03   | 3,10E-04  |
| GOTERM_BP_FAT | GO:0009109~coenzyme catabolic process                                               | 17                       | 0,7        | 5,13E-06 | 9,93E-03   | 3,22E-04  |
| GOTERM_BP_FAT | GO:0009060~aerobic respiration                                                      | 17                       | 0,7        | 8,36E-06 | 1,61E-02   | 5,08E-04  |
| GOTERM_BP_FAT | GO:0051187~cofactor catabolic process                                               | 17                       | 0,7        | 8,36E-06 | 1,61E-02   | 5,08E-04  |
| GOTERM_BP_FAT | GO:0006099~tricarboxylic acid cycle                                                 | 16                       | 0,7        | 1,70E-05 | 3,26E-02   | 1,00E-03  |
| GOTERM_BP_FAT | GO:0046356~acetyl-CoA catabolic process                                             | 16                       | 0,7        | 1,70E-05 | 3,26E-02   | 1,00E-03  |
| GOTERM_BP_FAT | GO:0046164~alcohol catabolic process                                                | 21                       | 0,9        | 1,92E-05 | 3,66E-02   | 1,10E-03  |
| GOTERM_BP_FAT | GO:0015986~ATP synthesis coupled proton transport                                   | 22                       | 0,9        | 2,67E-05 | 5,05E-02   | 1,48E-03  |
| GOTERM_BP_FAT | GO:0015985~energy coupled proton transport, down electrochemical gradient           | 22                       | 0,9        | 2,67E-05 | 5,05E-02   | 1,48E-03  |
| GOTERM_BP_FAT | GO:0016052~carbohydrate catabolic process                                           | 28                       | 1,2        | 4,02E-05 | 7,52E-02   | 2,17E-03  |
| GOTERM_BP_FAT | GO:0034220~ion transmembrane transport                                              | 22                       | 0,9        | 4,91E-05 | 9,10E-02   | 2,58E-03  |
| GOTERM_BP_FAT | GO:0019748~secondary metabolic process                                              | 25                       | 1,0        | 6,87E-05 | 1,25E-01   | 3,51E-03  |
| GOTERM_BP_FAT | GO:0006007~glucose catabolic process                                                | 18                       | 0,8        | 7,13E-05 | 1,29E-01   | 3,55E-03  |
| GOTERM_BP_FAT | GO:0019320~hexose catabolic process                                                 | 18                       | 0,8        | 7,13E-05 | 1,29E-01   | 3,55E-03  |
| GOTERM_BP_FAT | GO:0046365~monosaccharide catabolic process                                         | 18                       | 0,8        | 1,00E-04 | 1,77E-01   | 4,86E-03  |
| GOTERM_BP_FAT | GO:0006096~glycolysis                                                               | 15                       | 0,6        | 2,67E-04 | 4,05E-01   | 1,26E-02  |
| GOTERM_BP_FAT | GO:0043603~cellular amide metabolic process                                         | 10                       | 0,4        | 2,77E-04 | 4,17E-01   | 1,28E-02  |
| GOTERM_BP_FAT | GO:0006754~ATP biosynthetic process                                                 | 25                       | 1,0        | 2,78E-04 | 4,18E-01   | 1,25E-02  |
| GOTERM_BP_FAT | GO:0009636~response to toxin                                                        | 12                       | 0,5        | 2,97E-04 | 4,39E-01   | 1,31E-02  |
| GOTERM_BP_FAT | GO:0016310~phosphorylation                                                          | 90                       | 3,8        | 3,72E-04 | 5,15E-01   | 1,60E-02  |
| GOTERM_BP_FAT | GO:0046034~ATP metabolic process                                                    | 25                       | 1,0        | 4,23E-04 | 5,61E-01   | 1,77E-02  |
| GOTERM_BP_FAT | GO:0016042~lipid catabolic process                                                  | 17                       | 0,7        | 4,85E-04 | 6,11E-01   | 1,99E-02  |
| GOTERM_BP_FAT | GO:0006163~purine nucleotide metabolic process                                      | 35                       | 1,5        | 5,50E-04 | 6,57E-01   | 2,21E-02  |
| GOTERM_BP_FAT | GO:0006164~purine nucleotide biosynthetic process                                   | 34                       | 1,4        | 5,51E-04 | 6,58E-01   | 2,16E-02  |
| GOTERM_BP_FAT | GO:0009145~purine nucleoside triphosphate biosynthetic process                      | 25                       | 1,0        | 6,31E-04 | 7,07E-01   | 2,43E-02  |
| GOTERM_BP_FAT | GO:0009206~purine ribonucleoside triphosphate biosynthetic process                  | 25                       | 1,0        | 6,31E-04 | 7,07E-01   | 2,43E-02  |
| GOTERM_BP_FAT | GO:0044242~cellular lipid catabolic process                                         | 12                       | 0,5        | 6,91E-04 | 7,39E-01   | 2,60E-02  |
| GOTERM_BP_FAT | GO:0009152~purine ribonucleotide biosynthetic process                               | 29                       | 1,2        | 7,28E-04 | 7,57E-01   | 2,69E-02  |
| GOTERM_BP_FAT | GO:0009260~ribonucleotide biosynthetic process                                      | 30                       | 1,3        | 7,39E-04 | 7,63E-01   | 2,68E-02  |
| GOTERM_BP_FAT | GO:0009142~nucleoside triphosphate biosynthetic process                             | 25                       | 1,0        | 7,65E-04 | 7,74E-01   | 2,72E-02  |
| GOTERM_BP_FAT | GO:0009201~ribonucleoside triphosphate biosynthetic process                         | 25                       | 1,0        | 7,65E-04 | 7,74E-01   | 2,72E-02  |
| GOTERM_BP_FAT | GO:0009165~nucleotide biosynthetic process                                          | 38                       | 1,6        | 1,21E-03 | 9,05E-01   | 4,19E-02  |
| GOTERM_BP_FAT | GO:0034654~nucleobase, nucleoside, nucleotide and nucleic acid biosynthetic process | 39                       | 1,6        | 1,51E-03 | 9,47E-01   | 5,12E-02  |
| GOTERM_BP_FAT | GO:0034404~nucleobase, nucleoside and nucleotide biosynthetic process               | 39                       | 1,6        | 1,51E-03 | 9,47E-01   | 5,12E-02  |
| GOTERM_BP_FAT | GO:0016054~organic acid catabolic process                                           | 16                       | 0,7        | 1,55E-03 | 9,51E-01   | 5,14E-02  |
| GOTERM_BP_FAT | GO:0046395~carboxylic acid catabolic process                                        | 16                       | 0,7        | 1,55E-03 | 9,51E-01   | 5,14E-02  |
| GOTERM_BP_FAT | GO:0009205~purine ribonucleoside triphosphate metabolic process                     | 25                       | 1,0        | 1,58E-03 | 9,53E-01   | 5,15E-02  |
| GOTERM_BP_FAT | GO:0009144~purine nucleoside triphosphate metabolic process                         | 25                       | 1,0        | 1,58E-03 | 9,53E-01   | 5,15E-02  |
| GOTERM_BP_FAT | GO:0055085~transmembrane transport                                                  | 30                       | 1,3        | 1,61E-03 | 9,57E-01   | 5,19E-02  |
| GOTERM_BP_FAT | GO:0009259~ribonucleotide metabolic process                                         | 30                       | 1,3        | 1,61E-03 | 9,57E-01   | 5,19E-02  |
| GOTERM_BP_FAT | GO:0009150~purine ribonucleotide metabolic process                                  | 29                       | 1,2        | 1,62E-03 | 9,58E-01   | 5,13E-02  |
| GOTERM_BP_FAT | GO:0009199~ribonucleoside triphosphate metabolic process                            | 25                       | 1,0        | 1,87E-03 | 9,74E-01   | 5,79E-02  |
| GOTERM_BP_FAT | GO:0051188~cofactor biosynthetic process                                            | 19                       | 0,8        | 2,14E-03 | 9,85E-01   | 6,51E-02  |
| GOTERM_BP_FAT | GO:0009141~nucleoside triphosphate metabolic process                                | 25                       | 1,0        | 2,20E-03 | 9,86E-01   | 6,58E-02  |
| GOTERM_BP_FAT | GO:0030001~metal ion transport                                                      | 39                       | 1,6        | 3,42E-03 | 9,99E-01   | 9,89E-02  |
| GOTERM_BP_FAT | GO:0055002~striated muscle cell development                                         | 15                       | 0,6        | 4,50E-03 | 1,00E+00   | 1,26E-01  |
| GOTERM_BP_FAT | GO:0055001~muscle cell development                                                  | 15                       | 0,6        | 4,50E-03 | 1,00E+00   | 1,26E-01  |
| GOTERM_BP_FAT | GO:0006952~defense response                                                         | 40                       | 1,7        | 4,51E-03 | 1,00E+00   | 1,25E-01  |
| GOTERM_BP_FAT | GO:0034637~cellular carbohydrate biosynthetic process                               | 10                       | 0,4        | 5,59E-03 | 1,00E+00   | 1,50E-01  |
| GOTERM_BP_FAT | GO:0016051~carbohydrate biosynthetic process                                        | 17                       | 0,7        | 6,27E-03 | 1,00E+00   | 1,65E-01  |
| GOTERM_BP_FAT | GO:0006575~cellular amino acid derivative metabolic process                         | 18                       | 0,8        | 6,47E-03 | 1,00E+00   | 1,67E-01  |
| GOTERM_BP_FAT | GO:0010817~regulation of hormone levels                                             | 12                       | 0,5        | 8,20E-03 | 1,00E+00   | 2,04E-01  |
| GOTERM_BP_FAT | GO:0042445~hormone metabolic process                                                | 12                       | 0,5        | 8,20E-03 | 1,00E+00   | 2,04E-01  |
| GOTERM_BP_FAT | GO:0009064~glutamine family amino acid metabolic process                            | 11                       | 0,5        | 9,17E-03 | 1,00E+00   | 2,23E-01  |
| GOTERM_BP_FAT | GO:0006796~phosphate metabolic process                                              | 103                      | 4,3        | 9,63E-03 | 1,00E+00   | 2,30E-01  |
| GOTERM_BP_FAT | GO:0006793~phosphorus metabolic process                                             | 103                      | 4,3        | 9,63E-03 | 1,00E+00   | 2,30E-01  |
| GOTERM_BP_FAT | GO:0006814~sodium ion transport                                                     | 20                       | 0,8        | 1,41E-02 | 1,00E+00   | 3,16E-01  |
| GOTERM_BP_FAT | GO:0006790~sulfur metabolic process                                                 | 12                       | 0,5        | 1,61E-02 | 1,00E+00   | 3,46E-01  |
| GOTERM_BP_FAT | GO:0007606~sensory perception of chemical stimulus                                  | 41                       | 1,7        | 1,85E-02 | 1,00E+00   | 3,85E-01  |
| GOTERM_BP_FAT | GO:0009063~cellular amino acid catabolic process                                    | 11                       | 0,5        | 1,86E-02 | 1,00E+00   | 3,81E-01  |
| GOTERM_BP_FAT | GO:0009108~coenzyme biosynthetic process                                            | 13                       | 0,5        | 2,03E-02 | 1,00E+00   | 4,04E-01  |



|               |                                                                                                      |     |      |          |          |          |
|---------------|------------------------------------------------------------------------------------------------------|-----|------|----------|----------|----------|
| GOTERM_BP_FAT | GO:0008610~lipid biosynthetic process                                                                | 27  | 1,1  | 2,64E-02 | 1,00E+00 | 4,87E-01 |
| GOTERM_BP_FAT | GO:0051146~striated muscle cell differentiation                                                      | 17  | 0,7  | 2,66E-02 | 1,00E+00 | 4,85E-01 |
| GOTERM_BP_FAT | GO:0045087~innate immune response                                                                    | 22  | 0,9  | 2,78E-02 | 1,00E+00 | 4,96E-01 |
| GOTERM_BP_FAT | GO:0007608~sensory perception of smell                                                               | 21  | 0,9  | 2,91E-02 | 1,00E+00 | 5,08E-01 |
| GOTERM_BP_FAT | GO:0009310~amine catabolic process                                                                   | 11  | 0,5  | 3,36E-02 | 1,00E+00 | 5,56E-01 |
| GOTERM_BP_FAT | GO:0031032~actomyosin structure organization                                                         | 11  | 0,5  | 4,75E-02 | 1,00E+00 | 6,80E-01 |
| GOTERM_BP_FAT | GO:0007519~skeletal muscle tissue development                                                        | 10  | 0,4  | 6,65E-02 | 1,00E+00 | 7,97E-01 |
| GOTERM_BP_FAT | GO:0042692~muscle cell differentiation                                                               | 17  | 0,7  | 7,65E-02 | 1,00E+00 | 8,38E-01 |
| GOTERM_BP_FAT | GO:0007498~mesoderm development                                                                      | 20  | 0,8  | 7,68E-02 | 1,00E+00 | 8,36E-01 |
| GOTERM_BP_FAT | GO:0006820~anion transport                                                                           | 12  | 0,5  | 8,14E-02 | 1,00E+00 | 8,50E-01 |
| GOTERM_BP_FAT | GO:0009309~amine biosynthetic process                                                                | 12  | 0,5  | 8,14E-02 | 1,00E+00 | 8,50E-01 |
| GOTERM_CC_FAT | GO:0005739~mitochondrion                                                                             | 192 | 8,0  | 2,41E-24 | 8,10E-22 | 8,10E-22 |
| GOTERM_CC_FAT | GO:0044429~mitochondrial part                                                                        | 152 | 6,3  | 1,16E-23 | 3,89E-21 | 1,94E-21 |
| GOTERM_CC_FAT | GO:0042598~vesicular fraction                                                                        | 56  | 2,3  | 2,25E-21 | 7,57E-19 | 2,52E-19 |
| GOTERM_CC_FAT | GO:0005792~microsome                                                                                 | 56  | 2,3  | 2,25E-21 | 7,57E-19 | 2,52E-19 |
| GOTERM_CC_FAT | GO:0005624~membrane fraction                                                                         | 57  | 2,4  | 2,53E-17 | 8,50E-15 | 2,13E-15 |
| GOTERM_CC_FAT | GO:0005626~insoluble fraction                                                                        | 57  | 2,4  | 2,25E-16 | 7,46E-14 | 1,49E-14 |
| GOTERM_CC_FAT | GO:0070469~respiratory chain                                                                         | 48  | 2,0  | 1,18E-15 | 4,10E-13 | 6,84E-14 |
| GOTERM_CC_FAT | GO:0000267~cell fraction                                                                             | 57  | 2,4  | 1,27E-15 | 4,10E-13 | 5,86E-14 |
| GOTERM_CC_FAT | GO:0005746~mitochondrial respiratory chain                                                           | 46  | 1,9  | 6,88E-15 | 2,31E-12 | 2,89E-13 |
| GOTERM_CC_FAT | GO:0005740~mitochondrial envelope                                                                    | 94  | 3,9  | 6,13E-14 | 2,06E-11 | 2,29E-12 |
| GOTERM_CC_FAT | GO:0044455~mitochondrial membrane part                                                               | 60  | 2,5  | 1,83E-13 | 6,13E-11 | 6,13E-12 |
| GOTERM_CC_FAT | GO:0005576~extracellular region                                                                      | 151 | 6,3  | 5,02E-13 | 1,69E-10 | 1,53E-11 |
| GOTERM_CC_FAT | GO:0031966~mitochondrial membrane                                                                    | 87  | 3,6  | 1,15E-12 | 3,85E-10 | 3,21E-11 |
| GOTERM_CC_FAT | GO:0005743~mitochondrial inner membrane                                                              | 75  | 3,1  | 6,49E-12 | 2,18E-09 | 1,68E-10 |
| GOTERM_CC_FAT | GO:0005811~lipid particle                                                                            | 86  | 3,6  | 2,44E-11 | 8,21E-09 | 5,86E-10 |
| GOTERM_CC_FAT | GO:0031980~mitochondrial lumen                                                                       | 61  | 2,5  | 1,59E-10 | 5,33E-08 | 3,55E-09 |
| GOTERM_CC_FAT | GO:0005759~mitochondrial matrix                                                                      | 61  | 2,5  | 1,59E-10 | 5,33E-08 | 3,55E-09 |
| GOTERM_CC_FAT | GO:0019866~organelle inner membrane                                                                  | 76  | 3,2  | 2,08E-10 | 6,98E-08 | 4,36E-09 |
| GOTERM_CC_FAT | GO:0005747~mitochondrial respiratory chain complex I                                                 | 26  | 1,1  | 2,99E-09 | 1,01E-06 | 5,92E-08 |
| GOTERM_CC_FAT | GO:0030964~NADH dehydrogenase complex                                                                | 26  | 1,1  | 2,99E-09 | 1,01E-06 | 5,92E-08 |
| GOTERM_CC_FAT | GO:0045271~respiratory chain complex I                                                               | 26  | 1,1  | 2,99E-09 | 1,01E-06 | 5,92E-08 |
| GOTERM_CC_FAT | GO:0019898~extrinsic to membrane                                                                     | 57  | 2,4  | 5,74E-09 | 1,93E-06 | 1,07E-07 |
| GOTERM_CC_FAT | GO:0031967~organelle envelope                                                                        | 97  | 4,1  | 2,05E-07 | 6,90E-05 | 3,63E-06 |
| GOTERM_CC_FAT | GO:0031090~organelle membrane                                                                        | 117 | 4,9  | 2,19E-07 | 7,37E-05 | 3,68E-06 |
| GOTERM_CC_FAT | GO:0031975~envelope                                                                                  | 97  | 4,1  | 2,39E-07 | 8,02E-05 | 3,82E-06 |
| GOTERM_CC_FAT | GO:0043292~contractile fiber                                                                         | 15  | 0,6  | 2,57E-07 | 8,64E-05 | 3,93E-06 |
| GOTERM_CC_FAT | GO:0005783~endoplasmic reticulum                                                                     | 80  | 3,3  | 3,11E-06 | 1,04E-03 | 4,54E-05 |
| GOTERM_CC_FAT | GO:0044449~contractile fiber part                                                                    | 13  | 0,5  | 4,30E-06 | 1,44E-03 | 6,01E-05 |
| GOTERM_CC_FAT | GO:0005761~mitochondrial ribosome                                                                    | 30  | 1,3  | 5,38E-06 | 1,80E-03 | 7,23E-05 |
| GOTERM_CC_FAT | GO:0000313~organellar ribosome                                                                       | 30  | 1,3  | 5,38E-06 | 1,80E-03 | 7,23E-05 |
| GOTERM_CC_FAT | GO:0000314~organellar small ribosomal subunit                                                        | 16  | 0,7  | 3,70E-05 | 1,23E-02 | 4,78E-04 |
| GOTERM_CC_FAT | GO:0005763~mitochondrial small ribosomal subunit                                                     | 16  | 0,7  | 3,70E-05 | 1,23E-02 | 4,78E-04 |
| GOTERM_CC_FAT | GO:0030016~myofibril                                                                                 | 11  | 0,5  | 6,47E-05 | 2,15E-02 | 8,05E-04 |
| GOTERM_CC_FAT | GO:0016469~proton-transporting two-sector ATPase complex                                             | 23  | 1,0  | 2,32E-04 | 7,49E-02 | 2,78E-03 |
| GOTERM_CC_FAT | GO:0030017~sarcomere                                                                                 | 10  | 0,4  | 2,39E-04 | 7,73E-02 | 2,77E-03 |
| GOTERM_CC_FAT | GO:0005773~vacuole                                                                                   | 21  | 0,9  | 1,39E-03 | 3,74E-01 | 1,55E-02 |
| GOTERM_CC_FAT | GO:0016021~integral to membrane                                                                      | 271 | 11,3 | 1,63E-03 | 4,22E-01 | 1,75E-02 |
| GOTERM_CC_FAT | GO:0016471~vacuolar proton-transporting V-type ATPase complex                                        | 13  | 0,5  | 1,88E-03 | 4,68E-01 | 1,95E-02 |
| GOTERM_CC_FAT | GO:0033178~proton-transporting two-sector ATPase complex, catalytic domain                           | 13  | 0,5  | 1,88E-03 | 4,68E-01 | 1,95E-02 |
| GOTERM_CC_FAT | GO:0044437~vacuolar part                                                                             | 14  | 0,6  | 2,08E-03 | 5,04E-01 | 2,10E-02 |
| GOTERM_CC_FAT | GO:0005774~vacuolar membrane                                                                         | 14  | 0,6  | 2,08E-03 | 5,04E-01 | 2,10E-02 |
| GOTERM_CC_FAT | GO:0033176~proton-transporting V-type ATPase complex                                                 | 14  | 0,6  | 2,85E-03 | 6,17E-01 | 2,78E-02 |
| GOTERM_CC_FAT | GO:0031224~intrinsic to membrane                                                                     | 272 | 11,4 | 3,47E-03 | 6,89E-01 | 3,28E-02 |
| GOTERM_CC_FAT | GO:0000315~organellar large ribosomal subunit                                                        | 16  | 0,7  | 9,95E-03 | 9,65E-01 | 8,91E-02 |
| GOTERM_CC_FAT | GO:0005762~mitochondrial large ribosomal subunit                                                     | 16  | 0,7  | 9,95E-03 | 9,65E-01 | 8,91E-02 |
| GOTERM_CC_FAT | GO:0045259~proton-transporting ATP synthase complex                                                  | 11  | 0,5  | 1,46E-02 | 9,93E-01 | 1,25E-01 |
| GOTERM_CC_FAT | GO:0005777~peroxisome                                                                                | 14  | 0,6  | 1,68E-02 | 9,97E-01 | 1,39E-01 |
| GOTERM_CC_FAT | GO:0042579~microbody                                                                                 | 14  | 0,6  | 1,68E-02 | 9,97E-01 | 1,39E-01 |
| GOTERM_CC_FAT | GO:0015935~small ribosomal subunit                                                                   | 19  | 0,8  | 3,12E-02 | 1,00E+00 | 2,39E-01 |
| GOTERM_CC_FAT | GO:0005615~extracellular space                                                                       | 22  | 0,9  | 3,48E-02 | 1,00E+00 | 2,58E-01 |
| GOTERM_CC_FAT | GO:0044421~extracellular region part                                                                 | 34  | 1,4  | 8,11E-02 | 1,00E+00 | 5,00E-01 |
| GOTERM_CC_FAT | GO:0033177~proton-transporting two-sector ATPase complex, proton-transporting domain                 | 10  | 0,4  | 8,59E-02 | 1,00E+00 | 5,13E-01 |
| GOTERM_MF_FAT | GO:0009055~electron carrier activity                                                                 | 99  | 4,1  | 8,74E-24 | 8,72E-21 | 8,72E-21 |
| GOTERM_MF_FAT | GO:0005506~iron ion binding                                                                          | 107 | 4,5  | 1,74E-18 | 1,74E-15 | 8,68E-16 |
| GOTERM_MF_FAT | GO:0046906~tetrapyrrole binding                                                                      | 70  | 2,9  | 1,47E-17 | 1,46E-14 | 4,88E-15 |
| GOTERM_MF_FAT | GO:0020037~heme binding                                                                              | 70  | 2,9  | 1,47E-17 | 1,46E-14 | 4,88E-15 |
| GOTERM_MF_FAT | GO:0008061~chitin binding                                                                            | 56  | 2,3  | 5,63E-17 | 1,11E-13 | 2,76E-14 |
| GOTERM_MF_FAT | GO:0042302~structural constituent of cuticle                                                         | 59  | 2,5  | 2,16E-14 | 2,16E-11 | 4,32E-12 |
| GOTERM_MF_FAT | GO:0005198~structural molecule activity                                                              | 148 | 6,2  | 3,24E-14 | 3,23E-11 | 5,39E-12 |
| GOTERM_MF_FAT | GO:0005214~structural constituent of chitin-based cuticle                                            | 55  | 2,3  | 7,64E-14 | 7,63E-11 | 1,09E-11 |
| GOTERM_MF_FAT | GO:0001871~pattern binding                                                                           | 59  | 2,5  | 1,33E-13 | 1,32E-10 | 1,65E-11 |
| GOTERM_MF_FAT | GO:0030247~polysaccharide binding                                                                    | 59  | 2,5  | 1,33E-13 | 1,32E-10 | 1,65E-11 |
| GOTERM_MF_FAT | GO:0030246~carbohydrate binding                                                                      | 74  | 3,1  | 2,33E-11 | 2,33E-08 | 2,59E-09 |
| GOTERM_MF_FAT | GO:0048037~cofactor binding                                                                          | 72  | 3,0  | 3,53E-11 | 3,51E-08 | 3,51E-09 |
| GOTERM_MF_FAT | GO:0017171~serine hydrolase activity                                                                 | 102 | 4,3  | 2,26E-10 | 2,25E-07 | 2,05E-08 |
| GOTERM_MF_FAT | GO:0008236~serine-type peptidase activity                                                            | 101 | 4,2  | 3,47E-10 | 3,46E-07 | 2,88E-08 |
| GOTERM_MF_FAT | GO:0008233~peptidase activity                                                                        | 176 | 7,3  | 2,44E-09 | 2,43E-06 | 1,87E-07 |
| GOTERM_MF_FAT | GO:0004252~serine-type endopeptidase activity                                                        | 91  | 3,8  | 4,81E-09 | 4,80E-06 | 3,43E-07 |
| GOTERM_MF_FAT | GO:0008010~structural constituent of chitin-based larval cuticle                                     | 24  | 1,0  | 1,30E-08 | 1,29E-05 | 8,63E-07 |
| GOTERM_MF_FAT | GO:0070011~peptidase activity, acting on L-amino acid peptides                                       | 164 | 6,8  | 2,68E-08 | 2,67E-05 | 1,67E-06 |
| GOTERM_MF_FAT | GO:0003954~NADH dehydrogenase activity                                                               | 25  | 1,0  | 2,79E-08 | 2,78E-05 | 1,64E-06 |
| GOTERM_MF_FAT | GO:0016651~oxidoreductase activity, acting on NADH or NADPH                                          | 28  | 1,2  | 5,09E-08 | 5,07E-05 | 2,82E-06 |
| GOTERM_MF_FAT | GO:0016490~structural constituent of peritrophic membrane                                            | 17  | 0,7  | 8,00E-08 | 7,97E-05 | 4,20E-06 |
| GOTERM_MF_FAT | GO:0004175~endopeptidase activity                                                                    | 128 | 5,3  | 8,15E-08 | 8,13E-05 | 4,06E-06 |
| GOTERM_MF_FAT | GO:0005062~coenzyme binding                                                                          | 52  | 2,2  | 1,17E-07 | 1,16E-04 | 5,54E-06 |
| GOTERM_MF_FAT | GO:0004091~carboxylesterase activity                                                                 | 43  | 1,8  | 1,79E-07 | 1,78E-04 | 8,10E-06 |
| GOTERM_MF_FAT | GO:0005013~NADH dehydrogenase (quinone) activity                                                     | 21  | 0,9  | 4,52E-07 | 4,50E-04 | 1,96E-05 |
| GOTERM_MF_FAT | GO:0016655~oxidoreductase activity, acting on NADH or NADPH, quinone or similar compound as acceptor | 21  | 0,9  | 4,52E-07 | 4,50E-04 | 1,96E-05 |
| GOTERM_MF_FAT | GO:0008137~NADH dehydrogenase (ubiquinone) activity                                                  | 21  | 0,9  | 4,52E-07 | 4,50E-04 | 1,96E-05 |
| GOTERM_MF_FAT | GO:0015078~hydrogen ion transmembrane transporter activity                                           | 38  | 1,6  | 1,20E-06 | 1,19E-03 | 4,98E-05 |
| GOTERM_MF_FAT | GO:0019842~vitamin binding                                                                           | 39  | 1,6  | 1,32E-06 | 1,32E-03 | 5,27E-05 |
| GOTERM_MF_FAT | GO:0015077~monovalent inorganic cation transmembrane transporter activity                            | 38  | 1,6  | 2,17E-06 | 2,16E-03 | 8,31E-05 |
| GOTERM_MF_FAT | GO:0004364~glutathione transferase activity                                                          | 20  | 0,8  | 4,26E-06 | 4,24E-03 | 1,57E-04 |
| GOTERM_MF_FAT | GO:0015020~glucuronosyltransferase activity                                                          | 19  | 0,8  | 4,34E-06 | 4,32E-03 | 1,55E-04 |

|               |                                                                                                          |    |     |          |          |          |
|---------------|----------------------------------------------------------------------------------------------------------|----|-----|----------|----------|----------|
| GOTERM_MF_FAT | GO:0016765~transferase activity, transferring alkyl or aryl (other than methyl) groups                   | 27 | 1,1 | 4,65E-06 | 4,63E-03 | 1,60E-04 |
| GOTERM_MF_FAT | GO:0022890~inorganic cation transmembrane transporter activity                                           | 45 | 1,9 | 6,37E-06 | 6,34E-03 | 2,12E-04 |
| GOTERM_MF_FAT | GO:0008553~hydrogen-exporting ATPase activity, phosphorylative mechanism                                 | 22 | 0,9 | 9,44E-05 | 8,98E-02 | 3,03E-03 |
| GOTERM_MF_FAT | GO:0030170~pyridoxal phosphate binding                                                                   | 18 | 0,8 | 1,90E-04 | 1,73E-01 | 5,90E-03 |
| GOTERM_MF_FAT | GO:0070279~vitamin B6 binding                                                                            | 18 | 0,8 | 1,90E-04 | 1,73E-01 | 5,90E-03 |
| GOTERM_MF_FAT | GO:0004035~alkaline phosphatase activity                                                                 | 10 | 0,4 | 3,48E-04 | 2,93E-01 | 1,05E-02 |
| GOTERM_MF_FAT | GO:0043492~ATPase activity, coupled to movement of substances                                            | 42 | 1,8 | 3,65E-04 | 3,05E-01 | 1,06E-02 |
| GOTERM_MF_FAT | GO:0042626~ATPase activity, coupled to transmembrane movement of substances                              | 42 | 1,8 | 3,65E-04 | 3,05E-01 | 1,06E-02 |
| GOTERM_MF_FAT | GO:0016298~lipase activity                                                                               | 31 | 1,3 | 4,21E-04 | 3,43E-01 | 1,19E-02 |
| GOTERM_MF_FAT | GO:0016820~hydrolase activity, acting on acid anhydrides, catalyzing transmembrane movement of substa    | 42 | 1,8 | 5,10E-04 | 3,98E-01 | 1,40E-02 |
| GOTERM_MF_FAT | GO:0031406~carboxylic acid binding                                                                       | 24 | 1,0 | 6,34E-04 | 4,69E-01 | 1,70E-02 |
| GOTERM_MF_FAT | GO:0004806~triacylglycerol lipase activity                                                               | 17 | 0,7 | 6,67E-04 | 4,86E-01 | 1,73E-02 |
| GOTERM_MF_FAT | GO:0015926~glucosidase activity                                                                          | 11 | 0,5 | 6,72E-04 | 4,88E-01 | 1,70E-02 |
| GOTERM_MF_FAT | GO:0015370~solute:sodium symporter activity                                                              | 23 | 1,0 | 7,91E-04 | 5,46E-01 | 1,95E-02 |
| GOTERM_MF_FAT | GO:0008237~metallopeptidase activity                                                                     | 48 | 2,0 | 9,04E-04 | 5,94E-01 | 2,18E-02 |
| GOTERM_MF_FAT | GO:0051287~NAD or NADH binding                                                                           | 17 | 0,7 | 9,27E-04 | 6,04E-01 | 2,18E-02 |
| GOTERM_MF_FAT | GO:0015662~ATPase activity, coupled to transmembrane movement of ions, phosphorylative mechanism         | 26 | 1,1 | 1,03E-03 | 6,42E-01 | 2,36E-02 |
| GOTERM_MF_FAT | GO:0015405~P-P-bond-hydrolysis-driven transmembrane transporter activity                                 | 45 | 1,9 | 1,25E-03 | 7,13E-01 | 2,79E-02 |
| GOTERM_MF_FAT | GO:0015399~primary active transmembrane transporter activity                                             | 45 | 1,9 | 1,25E-03 | 7,13E-01 | 2,79E-02 |
| GOTERM_MF_FAT | GO:0042625~ATPase activity, coupled to transmembrane movement of ions                                    | 26 | 1,1 | 2,35E-03 | 9,04E-01 | 5,07E-02 |
| GOTERM_MF_FAT | GO:0019829~cation-transporting ATPase activity                                                           | 13 | 0,5 | 2,85E-03 | 9,42E-01 | 6,00E-02 |
| GOTERM_MF_FAT | GO:0004180~carboxypeptidase activity                                                                     | 17 | 0,7 | 3,88E-03 | 9,79E-01 | 7,91E-02 |
| GOTERM_MF_FAT | GO:0050660~FAD binding                                                                                   | 21 | 0,9 | 3,93E-03 | 9,80E-01 | 7,86E-02 |
| GOTERM_MF_FAT | GO:0046961~proton-transporting ATPase activity, rotational mechanism                                     | 11 | 0,5 | 4,14E-03 | 9,84E-01 | 8,10E-02 |
| GOTERM_MF_FAT | GO:0015294~solute:cation symporter activity                                                              | 25 | 1,0 | 6,08E-03 | 9,98E-01 | 1,14E-01 |
| GOTERM_MF_FAT | GO:0004620~phospholipase activity                                                                        | 17 | 0,7 | 7,90E-03 | 1,00E+00 | 1,44E-01 |
| GOTERM_MF_FAT | GO:0008509~anion transmembrane transporter activity                                                      | 27 | 1,1 | 1,03E-02 | 1,00E+00 | 1,79E-01 |
| GOTERM_MF_FAT | GO:0015293~symporter activity                                                                            | 25 | 1,0 | 1,16E-02 | 1,00E+00 | 1,97E-01 |
| GOTERM_MF_FAT | GO:0004222~metalloendopeptidase activity                                                                 | 24 | 1,0 | 1,23E-02 | 1,00E+00 | 2,04E-01 |
| GOTERM_MF_FAT | GO:0016877~ligase activity, forming carbon-sulfur bonds                                                  | 10 | 0,4 | 1,43E-02 | 1,00E+00 | 2,30E-01 |
| GOTERM_MF_FAT | GO:0005549~odorant binding                                                                               | 33 | 1,4 | 1,90E-02 | 1,00E+00 | 2,90E-01 |
| GOTERM_MF_FAT | GO:0016811~hydrolase activity, acting on carbon-nitrogen (but not peptide) bonds, in linear amides       | 19 | 0,8 | 1,92E-02 | 1,00E+00 | 2,88E-01 |
| GOTERM_MF_FAT | GO:0015101~organic cation transmembrane transporter activity                                             | 13 | 0,5 | 2,51E-02 | 1,00E+00 | 3,53E-01 |
| GOTERM_MF_FAT | GO:0015296~anion:cation symporter activity                                                               | 13 | 0,5 | 2,51E-02 | 1,00E+00 | 3,53E-01 |
| GOTERM_MF_FAT | GO:0016701~oxidoreductase activity, acting on single donors with incorporation of molecular oxygen       | 13 | 0,5 | 3,08E-02 | 1,00E+00 | 4,10E-01 |
| GOTERM_MF_FAT | GO:0051536~iron-sulfur cluster binding                                                                   | 16 | 0,7 | 3,19E-02 | 1,00E+00 | 4,16E-01 |
| GOTERM_MF_FAT | GO:0051540~metal cluster binding                                                                         | 16 | 0,7 | 3,19E-02 | 1,00E+00 | 4,16E-01 |
| GOTERM_MF_FAT | GO:0004656~procollagen-proline 4-dioxygenase activity                                                    | 10 | 0,4 | 3,29E-02 | 1,00E+00 | 4,21E-01 |
| GOTERM_MF_FAT | GO:0019798~procollagen-proline dioxygenase activity                                                      | 10 | 0,4 | 3,29E-02 | 1,00E+00 | 4,21E-01 |
| GOTERM_MF_FAT | GO:0008238~exopeptidase activity                                                                         | 28 | 1,2 | 3,44E-02 | 1,00E+00 | 4,31E-01 |
| GOTERM_MF_FAT | GO:0031545~peptidyl-proline 4-dioxygenase activity                                                       | 10 | 0,4 | 4,16E-02 | 1,00E+00 | 4,90E-01 |
| GOTERM_MF_FAT | GO:0031543~peptidyl-proline dioxygenase activity                                                         | 10 | 0,4 | 4,16E-02 | 1,00E+00 | 4,90E-01 |
| GOTERM_MF_FAT | GO:0031418~L-ascorbic acid binding                                                                       | 10 | 0,4 | 4,16E-02 | 1,00E+00 | 4,90E-01 |
| GOTERM_MF_FAT | GO:0016706~oxidoreductase activity, acting on paired donors, with incorporation or reduction of molecula | 13 | 0,5 | 4,50E-02 | 1,00E+00 | 5,12E-01 |
| GOTERM_MF_FAT | GO:0015300~solute:solute antiporter activity                                                             | 10 | 0,4 | 5,19E-02 | 1,00E+00 | 5,58E-01 |
| GOTERM_MF_FAT | GO:0016702~oxidoreductase activity, acting on single donors with incorporation of molecular oxygen, inco | 12 | 0,5 | 5,69E-02 | 1,00E+00 | 5,87E-01 |
| GOTERM_MF_FAT | GO:0015297~antiporter activity                                                                           | 10 | 0,4 | 6,36E-02 | 1,00E+00 | 6,24E-01 |
| GOTERM_MF_FAT | GO:0022803~passive transmembrane transporter activity                                                    | 43 | 1,8 | 7,07E-02 | 1,00E+00 | 6,59E-01 |
| GOTERM_MF_FAT | GO:0015267~channel activity                                                                              | 43 | 1,8 | 7,07E-02 | 1,00E+00 | 6,59E-01 |
| GOTERM_MF_FAT | GO:0022838~substrate specific channel activity                                                           | 41 | 1,7 | 8,69E-02 | 1,00E+00 | 7,31E-01 |
| GOTERM_MF_FAT | GO:0022836~gated channel activity                                                                        | 28 | 1,2 | 9,08E-02 | 1,00E+00 | 7,42E-01 |
